# Supplementary material for: Mass Administration of Ivermectin for the Elimination of Onchocerciasis Significantly Reduced and Maintained Low the Prevalence of Strongyloides stercoralis in Esmeraldas, Ecuador
Source: PLoS Negl Trop Dis. 2015 Nov 5;9(11):e0004150. doi: 10.1371/journal.pntd.0004150 (PMC4635009; doi:10.1371/journal.pntd.0004150)
Supplement: S1 Database — (XLS) [file pntd.0004150.s001.xls]

## Sheet: 2013
Codigo	Comunidad	Sexo	Edad	Year	Etnia	Resultado	Strongy	Ascaris	Ancylost	Trichuris	ELISA	RESULT	Area	AntiSs	FinalResul
ANGO 01	ANGO	F	14	2013	N	P	0	3	0	0	0.082	0	Onco	1	0
ANGO 21	ANGO	M	12	2013	N	P	0	2	0	0	0	0	Onco	1	0
ANGO 20	ANGO	M	16	2013	N	N	0	0	0	0	0.053	0	Onco	1	0
ANGO 11	ANGO	F	8	2013	N	P	0	1	0	0	0.042	0	Onco	1	0
ANGO 10	ANGO	F	6	2013	N	P	0	0	0	1	0.003	0	Onco	1	0
ANGO 06	ANGO	M	5	2013	N	P	0	1	0	0	-0.003	0	Onco	1	0
ANGO 02	ANGO	F	0	2013	N	P	0	3	0	0	0.123	0	Onco	1	0
ANGO 03	ANGO	F	6	2013	N	N	0	0	0	0	0.001	0	Onco	1	0
ANGO 13	ANGO	M	7	2013	N	N	0	0	0	0	0.038	0	Onco	1	0
ANGO 15	ANGO	M	12	2013	N	P	0	3	0	0	0.003	0	Onco	1	0
ANGO 22	ANGO	F	11	2013	N	P	0	3	0	0	0.012	0	Onco	1	0
ANGO 19	ANGO	M	9	2013	N	N	0	0	0	0	0.066	0	Onco	1	0
ANGO 18	ANGO	M	14	2013	N	P	0	2	1	1	0.105	0	Onco	1	0
ANGO 17	ANGO	M	11	2013	N	P	0	1	0	0	-0.003	0	Onco	1	0
ANGO 08	ANGO	F	5	2013	N	N	0	0	0	0	0	0	Onco	1	0
ANGO 16	ANGO	M	10	2013	N	P	0	1	0	0	2.508	2	Onco	3	1
ANGO 12	ANGO	M	12	2013	N	P	0	0	0	1	0	0	Onco	1	0
ANGO 07	ANGO	F	7	2013	N	N	0	0	0	0	0.04	0	Onco	1	0
ANGO 05	ANGO	F	9	2013	N	N	0	0	0	0	0.029	0	Onco	1	0
ANGO 04	ANGO	M	12	2013	N	P	0	4	1	0	0.001	0	Onco	1	0
ANGO 09	ANGO	F	11	2013	N	P	0	2	0	0	0.202	1	Onco	2	0
ANGO 14	ANGO	F	10	2013	N	P	0	1	0	0	0.073	0	Onco	1	0
ANGO 23	ANGO	M	7	2013	N	P	0	1	0	0	0.039	0	Onco	1	0
ANGO 24	ANGO	F	10	2013	N	P	0	1	0	0	0.039	0	Onco	1	0
PLNU 13	PLNU	F	9	2013	N	N	0	0	0	0	0.004	0	Onco	1	0
PLNU 07	PLNU	M	6	2013	N	N	0	0	0	0	0	0	Onco	1	0
PLNU 10	PLNU	M	5	2013	N	P	0	1	1	0	1.44	2	Onco	3	1
PLNU 06	PLNU	F	5	2013	N	P	0	3	0	0	0.059	0	Onco	1	0
PLNU 11	PLNU	F	16	2013	N	N	0	0	0	0	-0.002	0	Onco	1	0
PLNU 08	PLNU	F	6	2013	N	N	0	0	0	0	0	0	Onco	1	0
PLNU 12	PLNU	M	10	2013	N	P	0	5	1	1	0	0	Onco	1	0
PLNU 20	PLNU	F	8	2013	N	P	0	2	0	0	0	0	Onco	1	0
PLNU 16	PLNU	F	11	2013	N	P	0	2	1	0	0.149	0	Onco	1	0
PLNU 21	PLNU	M	10	2013	N	P	0	2	0	0	0	0	Onco	1	0
PLNU 03	PLNU	M	9	2013	N	P	0	2	0	0	0	0	Onco	1	0
PLNU 23	PLNU	M	4	2013	N	P	0	4	0	1	-0.002	0	Onco	1	0
PLNU 04	PLNU	M	5	2013	N	P	0	4	0	0	0.046	0	Onco	1	0
PLNU 05	PLNU	M	13	2013	N	P	0	3	1	0	0	0	Onco	1	0
PLNU 01	PLNU	F	5	2013	N	P	0	1	0	0	0.115	0	Onco	1	0
PLNU 02	PLNU	F	5	2013	N	P	0	3	0	0	0.049	0	Onco	1	0
PLNU 22	PLNU	F	10	2013	N	P	0	1	0	0	-0.001	0	Onco	1	0
PLNU 17	PLNU	M	11	2013	N	P	0	1	0	0	0	0	Onco	1	0
PLNU 09	PLNU	M	4	2013	N	N	0	0	0	0	0	0	Onco	1	0
PLNU 14	PLNU	F	4	2013	N	P	0	2	0	0	0	0	Onco	1	0
PLNU 15	PLNU	F	7	2013	N	P	0	4	0	0	0.003	0	Onco	1	0
PLNU 18	PLNU	F	5	2013	N	P	0	3	0	0	0.056	0	Onco	1	0
PLNU 19	PLNU	F	12	2013	N	P	0	3	0	0	0	0	Onco	1	0
PLNU 24	PLNU	F	6	2013	N	P	0	3	1	1	0	0	Onco	1	0
PLNU 25	PLNU	F	5	2013	N	P	0	3	0	0	-0.004	0	Onco	1	0
PLTI 28	PLTI	F	6	2013	N	P	0	3	0	0	0.095	0	Onco	1	0
PLTI 24	PLTI	M	6	2013	N	P	0	3	0	1	0.013	0	Onco	1	0
PLTI 20	PLTI	F	9	2013	N	P	0	3	1	1	0.013	0	Onco	1	0
PLTI 11	PLTI	M	7	2013	N	P	0	2	0	0	0.157	0	Onco	1	0
PLTI 12	PLTI	M	9	2013	N	P	0	2	3	0	0.03	0	Onco	1	0
PLTI 30	PLTI	M	12	2013	N	P	0	2	0	0	0	0	Onco	1	0
PLTI 27	PLTI	F	11	2013	N	P	0	3	0	0	0.133	0	Onco	1	0
PLTI 26	PLTI	F	10	2013	N	P	0	4	0	1	-0.001	0	Onco	1	0
PLTI 19	PLTI	F	11	2013	N	P	0	3	0	1	0	0	Onco	1	0
PLTI 16	PLTI	M	8	2013	N	P	0	2	0	0	0.063	0	Onco	1	0
PLTI 17	PLTI	M	6	2013	N	P	0	4	0	1	0.14	0	Onco	1	0
PLTI 25	PLTI	F	9	2013	N	N	0	0	0	0	-0.004	0	Onco	1	0
PLTI 15	PLTI	F	8	2013	N	P	0	2	0	0	0.123	0	Onco	1	0
PLTI 29	PLTI	F	14	2013	N	P	0	3	0	0	0	0	Onco	1	0
PLTI 21	PLTI	F	7	2013	N	N	0	0	0	0	0	0	Onco	1	0
PLTI 09	PLTI	F	13	2013	N	P	0	2	0	0	0	0	Onco	1	0
PLTI 10	PLTI	M	18	2013	N	P	0	4	0	1	0	0	Onco	1	0
PLTI 07	PLTI	M	11	2013	N	P	0	2	0	0	0.314	1	Onco	2	0
PLTI 08	PLTI	M	8	2013	N	P	0	2	0	0	0.076	0	Onco	1	0
PLTI 04	PLTI	M	6	2013	N	P	0	1	0	1	0.006	0	Onco	1	0
PLTI 03	PLTI	F	11	2013	N	P	0	2	0	0	-0.001	0	Onco	1	0
PLTI 06	PLTI	M	8	2013	N	P	0	2	0	0	0.105	0	Onco	1	0
PLTI 01	PLTI	M	17	2013	N	P	0	3	0	1	0	0	Onco	1	0
PLTI 02	PLTI	M	15	2013	N	P	0	3	0	0	0.005	0	Onco	1	0
PLTI 22	PLTI	M	8	2013	N	N	0	0	0	0	0	0	Onco	1	0
PLTI 23	PLTI	M	6	2013	N	N	0	0	0	0	0.024	0	Onco	1	0
PLTI 18	PLTI	M	9	2013	N	P	0	4	0	1	0.064	0	Onco	1	0
PLTI 13	PLTI	M	5	2013	N	P	0	1	0	0	-0.001	0	Onco	1	0
PLTI 14	PLTI	M	7	2013	N	P	0	1	0	0	0.027	0	Onco	1	0
PLTI 05	PLTI	M	10	2013	N	P	0	4	0	0	0.102	0	Onco	1	0
PLTI 31	PLTI	M	9	2013	N	N	0	0	0	0	0.004	0	Onco	1	0
PLTI 32	PLTI	F	10	2013	N	P	0	1	0	0	0.003	0	Onco	1	0
PLTI 33	PLTI	F	7	2013	N	N	0	0	0	0	0.003	0	Onco	1	0
PLTI 34	PLTI	M	9	2013	N	P	0	2	0	0	0.004	0	Onco	1	0
PLTI 35	PLTI	M	6	2013	N	P	0	2	0	0	-0.002	0	Onco	1	0
PLTI 36	PLTI	F	11	2013	N	P	0	2	0	0	0.017	0	Onco	1	0
PLTI 37	PLTI	M	6	2013	N	N	0	0	0	0	0.147	0	Onco	1	0
PLTI 38	PLTI	F	5	2013	N	P	0	2	0	1	0.08	0	Onco	1	0
PLTI 39	PLTI	M	12	2013	N	N	0	0	0	0	0.03	0	Onco	1	0
PLTI 40	PLTI	F	11	2013	N	P	0	2	0	1	0.064	0	Onco	1	0
PLTI 41	PLTI	F	9	2013	N	P	0	2	0	0	0.002	0	Onco	1	0
PLOR 01	PLOR	F	5	2013	M	N	0	0	0	0	0	0	Onco	1	0
PLOR 02	PLOR	F	2	2013	N	N	0	0	0	0	-0.004	0	Onco	1	0
PLOR 03	PLOR	F	12	2013	N	N	0	0	0	0	-0.001	0	Onco	1	0
PLOR 04	PLOR	M	6	2013	N	N	0	0	0	0	0.098	0	Onco	1	0
PLOR 05	PLOR	F	9	2013	N	N	0	0	0	0	0.114	0	Onco	1	0
PLOR 06	PLOR	F	10	2013	N	N	0	0	0	0	0.002	0	Onco	1	0
PLOR 07	PLOR	M	3	2013	N	N	0	0	0	0	0.001	0	Onco	1	0
PLOR 08	PLOR	M	7	2013	N	N	0	0	0	0	0	0	Onco	1	0
PLOR 09	PLOR	F	11	2013	N	N	0	0	0	0	0	0	Onco	1	0
PLOR 10	PLOR	M	8	2013	N	N	0	0	0	0	-0.002	0	Onco	1	0
PLOR 11	PLOR	M	2	2013	N	N	0	0	0	0	-0.002	0	Onco	1	0
PLOR 12	PLOR	F	8	2013	N	N	0	0	0	0	-0.004	0	Onco	1	0
PLOR 13	PLOR	M	11	2013	N	N	0	0	0	0	0	0	Onco	1	0
PLOR 14	PLOR	M	7	2013	N	N	0	0	0	0	-0.004	0	Onco	1	0
PLOR 15	PLOR	M	8	2013	N	N	0	0	0	0	0.007	0	Onco	1	0
PLOR 16	PLOR	M	12	2013	N	N	0	0	0	0	0.011	0	Onco	1	0
PLOR 17	PLOR	F	12	2013	N	N	0	0	0	0	0	0	Onco	1	0
PLOR 18	PLOR	F	9	2013	N	N	0	0	0	0	-0.002	0	Onco	1	0
PLOR 19	PLOR	F	8	2013	N	N	0	0	0	0	-0.003	0	Onco	1	0
PLOR 20	PLOR	F	13	2013	N	N	0	0	0	0	0	0	Onco	1	0
PLOR 21	PLOR	F	5	2013	N	N	0	0	0	0	-0.004	0	Onco	1	0
PLOR 22	PLOR	F	7	2013	N	N	0	0	0	0	-0.002	0	Onco	1	0
PLOR 23	PLOR	F	9	2013	N	N	0	0	0	0	-0.005	0	Onco	1	0
PLOR 24	PLOR	F	11	2013	N	N	0	0	0	0	0.015	0	Onco	1	0
PLOR 25	PLOR	F	10	2013	N	N	0	0	0	0	0.002	0	Onco	1	0
PLOR 26	PLOR	M	10	2013	N	N	0	0	0	0	0	0	Onco	1	0
PLOR 27	PLOR	F	8	2013	N	N	0	0	0	0	0	0	Onco	1	0
PLOR 28	PLOR	M	11	2013	N	P	0	1	0	0	0	0	Onco	1	0
PLOR 29	PLOR	M	14	2013	N	N	0	0	0	0	0.033	0	Onco	1	0
PLOR 30	PLOR	F	5	2013	N	N	0	0	0	0	0	0	Onco	1	0
PLOR 31	PLOR	M	8	2013	N	N	0	0	0	0	0.058	0	Onco	1	0
PLOR 32	PLOR	M	9	2013	N	N	0	0	0	0	-0.003	0	Onco	1	0
PLOR 33	PLOR	F	8	2013	N	N	0	0	0	0	-0.005	0	Onco	1	0
PLOR 34	PLOR	F	8	2013	N	N	0	0	0	0	-0.006	0	Onco	1	0
PLOR 35	PLOR	F	11	2013	N	N	0	0	0	0	-0.004	0	Onco	1	0
PLOR 36	PLOR	F	6	2013	N	N	0	0	0	0	0.091	0	Onco	1	0
PLOR 37	PLOR	M	6	2013	N	P	0	1	0	0	0	0	Onco	1	0
PLOR 38	PLOR	M	10	2013	N	P	0	1	0	0	0.002	0	Onco	1	0
PLOR 39	PLOR	M	7	2013	N	N	0	0	0	0	0.032	0	Onco	1	0
PLOR 40	PLOR	M	12	2013	N	N	0	0	0	0	-0.001	0	Onco	1	0
PLOR 41	PLOR	M	5	2013	N	N	0	0	0	0	0	0	Onco	1	0
PLOR 42	PLOR	F	16	2013	N	N	0	0	0	0	0	0	Onco	1	0
PLOR 43	PLOR	M	14	2013	N	N	0	0	0	0	-0.004	0	Onco	1	0
PLOR 44	PLOR	F	6	2013	N	N	0	0	0	0	-0.002	0	Onco	1	0
PLOR 45	PLOR	M	8	2013	N	P	0	2	0	0	0.129	0	Onco	1	0
PLOR 46	PLOR	F	9	2013	N	N	0	0	0	0	0.04	0	Onco	1	0
PLOR 47	PLOR	M	11	2013	N	N	0	0	0	0	0.004	0	Onco	1	0
PLOR 48	PLOR	F	12	2013	N	N	0	0	0	0	0.027	0	Onco	1	0
PLOR 49	PLOR	M	11	2013	N	N	0	0	0	0	0	0	Onco	1	0
PLOR 50	PLOR	M	8	2013	N	N	0	0	0	0	0	0	Onco	1	0
PLOR 51	PLOR	F	6	2013	N	N	0	0	0	0	0	0	Onco	1	0
PLOR 52	PLOR	M	6	2013	N	P	0	1	0	0	0.007	0	Onco	1	0
PLOR 53	PLOR	F	7	2013	N	N	0	0	0	0	-0.002	0	Onco	1	0
PLOR 54	PLOR	F	11	2013	N	N	0	0	0	0	0	0	Onco	1	0
PLOR 55	PLOR	M	9	2013	N	N	0	0	0	0	0.041	0	Onco	1	0
PLOR 56	PLOR	F	7	2013	N	P	0	1	0	0	0.041	0	Onco	1	0
PLOR 57	PLOR	M	14	2013	N	N	0	0	0	0	0	0	Onco	1	0
PLOR 58	PLOR	F	10	2013	N	N	0	0	0	0	0	0	Onco	1	0
PLOR 59	PLOR	M	10	2013	N	P	0	1	0	0	0	0	Onco	1	0
PLOR 60	PLOR	M	12	2013	N	N	0	0	0	0	0	0	Onco	1	0
PLOR 61	PLOR	F	8	2013	N	N	0	0	0	0	0	0	Onco	1	0
PLOR 62	PLOR	F	4	2013	N	N	0	0	0	0	0.006	0	Onco	1	0
PLOR 63	PLOR	F	7	2013	N	N	0	0	0	0	0	0	Onco	1	0
PLOR 64	PLOR	M	12	2013	N	N	0	0	0	0	0	0	Onco	1	0
PLOR 65	PLOR	M	14	2013	N	N	0	0	0	0	0.001	0	Onco	1	0
PLOR 66	PLOR	M	1	2013	N	N	0	0	0	0	0.012	0	Onco	1	0
PLOR 67	PLOR	M	15	2013	N	N	0	0	0	0	0	0	Onco	1	0
PLOR 68	PLOR	M	11	2013	N	N	0	0	0	0	0.063	0	Onco	1	0
PLOR 69	PLOR	F	6	2013	N	N	0	0	0	0	0.035	0	Onco	1	0
PLOR 70	PLOR	M	8	2013	N	N	0	0	0	0	0	0	Onco	1	0
PLOR 71	PLOR	F	2	2013	N	N	0	0	0	0	0.032	0	Onco	1	0
PLOR 72	PLOR	M	4	2013	N	P	0	1	0	0	0.004	0	Onco	1	0
PLOR 73	PLOR	M	9	2013	N	N	0	0	0	0	0.014	0	Onco	1	0
PLOR 74	PLOR	M	13	2013	N	N	0	0	0	0	0.023	0	Onco	1	0
PLOR 75	PLOR	M	7	2013	N	N	0	0	0	0	0.196	0	Onco	1	0
PLOR 76	PLOR	F	7	2013	N	P	0	1	0	0	0.014	0	Onco	1	0
PLOR 77	PLOR	M	14	2013	N	N	0	0	0	0	0	0	Onco	1	0
PLOR 78	PLOR	F	12	2013	N	P	0	2	0	0	0	0	Onco	1	0
PLOR 79	PLOR	M	14	2013	N	N	0	0	0	0	0	0	Onco	1	0
PLOR 80	PLOR	F	7	2013	N	N	0	0	0	0	0.014	0	Onco	1	0
PLOR 81	PLOR	F	4	2013	N						0.096	0	Onco	1	0
PLOR 82	PLOR	M	5	2013	N	N	0	0	0	0	0.064	0	Onco	1	0
PLOR 83	PLOR	F	6	2013	N	N	0	0	0	0	0.404	1	Onco	2	0
PLOR 84	PLOR	M	6	2013	N	N	0	0	0	0	0.002	0	Onco	1	0
PLOR 85	PLOR	M	6	2013	N	N	0	0	0	0	0.005	0	Onco	1	0
PLOR 86	PLOR	M	5	2013	N						0.043	0	Onco	1	0
PLOR 87	PLOR	M	4	2013	N	N	0	0	0	0	0.062	0	Onco	1	0
PLOR 88	PLOR	M	5	2013	N	N	0	0	0	0	0.195	0	Onco	1	0
PLOR 89	PLOR	M		2013	N	N	0	0	0	0	0.033	0	Onco	1	0
PLOR 90	PLOR	M	6	2013	N	N	0	0	0	0	-0.005	0	Onco	1	0
ZAPO 01	ZAPO	F	8	2013	N	N	0	0	0	0	0.195	0	Onco	1	0
ZAPO 03	ZAPO	M	10	2013	N	N	0	0	0	0	0.051	0	Onco	1	0
ZAPO 02	ZAPO	M	5	2013	N	P	0	0	2	0	0.005	0	Onco	1	0
ZAPO 21	ZAPO	M	14	2013	N	P	0	0	1	0	0.01	0	Onco	1	0
ZAPO 22	ZAPO	M	12	2013	N	P	0	0	1	0	0	0	Onco	1	0
ZAPO 04	ZAPO	M	14	2013	N	P	0	0	1	0	0.048	0	Onco	1	0
ZAPO 15	ZAPO	F	12	2013	N	P	0	0	1	0	0.321	1	Onco	2	0
ZAPO 14	ZAPO	F	13	2013	N	P	0	1	0	0	0	0	Onco	1	0
ZAPO 05	ZAPO	F		2013	N						0	0	Onco	1	0
ZAPO 25	ZAPO	M	3	2013	N	P	0	0	0	1	0.132	0	Onco	1	0
ZAPO 23	ZAPO	M	7	2013	N	P	0	0	1	0	0.022	0	Onco	1	0
ZAPO 24	ZAPO	M	8	2013	N	P	0	2	1	0	0	0	Onco	1	0
ZAPO 20	ZAPO	F	13	2013	N	P	0	1	1	1	0	0	Onco	1	0
ZAPO 08	ZAPO	F	10	2013	N	N	0	0	0	0	0	0	Onco	1	0
ZAPO 09	ZAPO	F	8	2013	M	P	0	0	0	1	0	0	Onco	1	0
ZAPO 19	ZAPO	F	6	2013	N	N	0	0	0	0	0.027	0	Onco	1	0
ZAPO 17	ZAPO	F	13	2013	N	N	0	0	0	0	0	0	Onco	1	0
ZAPO 16	ZAPO	M	10	2013	N	P	0	0	1	0	0.108	0	Onco	1	0
ZAPO 06	ZAPO	F	10	2013	N	N	0	0	0	0	0	0	Onco	1	0
ZAPO 07	ZAPO	M	6	2013	N	P	0	0	1	0	0	0	Onco	1	0
ZAPO 12	ZAPO	F	10	2013	N	N	0	0	0	0	0.001	0	Onco	1	0
ZAPO 13	ZAPO	M	12	2013	N	P	0	0	1	0	0	0	Onco	1	0
ZAPO 11	ZAPO	F	8	2013	N	N	0	0	0	0	-0.001	0	Onco	1	0
ZAPO 10	ZAPO	F	6	2013	M	N	0	0	0	0	0	0	Onco	1	0
ZAPO 26	ZAPO	F	14	2013	N	P	0	2	1	0	0	0	Onco	1	0
ZAPO 27	ZAPO	M	5	2013	N	N	0	0	0	0	0.001	0	Onco	1	0
ZAPO 28	ZAPO	M	7	2013	N	P	0	0	0	1	0.008	0	Onco	1	0
ZAPO 29	ZAPO	F	9	2013	N	N	0	0	0	0	0.055	0	Onco	1	0
ZAPO 30	ZAPO	F	7	2013	N	N	0	0	0	0	0.015	0	Onco	1	0
GUAY 11	GUAY	M	7	2013	N	P	0	2	0	1	0	0	Onco	1	0
GUAY 05	GUAY	F	6	2013	N	P	0	3	0	0	0.019	0	Onco	1	0
GUAY 06	GUAY	F	12	2013	N	P	0	2	0	0	0.005	0	Onco	1	0
GUAY 19	GUAY	F	8	2013	N	N	0	0	0	0	0.072	0	Onco	1	0
GUAY 20	GUAY	M	11	2013	N	P	0	3	1	0	0.001	0	Onco	1	0
GUAY 10	GUAY	M	7	2013	N	N	0	0	0	0	0.337	1	Onco	2	0
GUAY 12	GUAY	M	10	2013	N	P	0	2	0	0	0	0	Onco	1	0
GUAY 14	GUAY	M	9	2013	N	P	0	2	0	1	0.002	0	Onco	1	0
GUAY 16	GUAY	M	8	2013	N	P	0	2	0	0	0.005	0	Onco	1	0
GUAY 03	GUAY	F	10	2013	N	N	0	0	0	0	0.027	0	Onco	1	0
GUAY 01	GUAY	M	5	2013	N	P	0	2	0	0	0.247	1	Onco	2	0
GUAY 08	GUAY	F	8	2013	N	N	0	0	0	0	0.023	0	Onco	1	0
GUAY 13	GUAY	F	10	2013	N	P	0	3	0	1	0.013	0	Onco	1	0
GUAY 07	GUAY	M	10	2013	N	P	0	3	0	0	0.012	0	Onco	1	0
GUAY 04	GUAY	F	6	2013	N	P	0	3	0	0	0.055	0	Onco	1	0
GUAY 02	GUAY	F	8	2013	N	N	0	0	0	0	0.002	0	Onco	1	0
GUAY 09	GUAY	F	15	2013	N	P	0	2	0	0	0.049	0	Onco	1	0
GUAY 15	GUAY	F	6	2013	N	P	0	2	0	0	-0.002	0	Onco	1	0
GUAY 17	GUAY	M	6	2013	N	N	0	0	0	0	0.147	0	Onco	1	0
GUAY 18	GUAY	F	6	2013	N	P	0	3	0	0	0.034	0	Onco	1	0
GUAY 22	GUAY	M	6	2013	N	P	0	1	0	0	0.08	0	Onco	1	0
GUAY 24	GUAY	M	6	2013	N	N	0	0	0	0	0.22	1	Onco	2	0
GUAY 25	GUAY	F	5	2013	N	N	0	0	0	0	0	0	Onco	1	0
GUAY 26	GUAY	M	4	2013	N	P	0	3	0	0	0.002	0	Onco	1	0
GUAY 27	GUAY	F	5	2013	N	N	0	0	0	0	-0.003	0	Onco	1	0
GUAY 28	GUAY	M	9	2013	N	P	0	1	0	0	0.036	0	Onco	1	0
GUAY 30	GUAY	F	6	2013	N	P	0	1	0	0	0.007	0	Onco	1	0
GUAY 31	GUAY	M	8	2013	N	P	0	1	0	0	0.107	0	Onco	1	0
GUAY 32	GUAY	M	7	2013	N	P	0	1	0	0	0	0	Onco	1	0
GUAY 34	GUAY	F	5	2013	N	P	0	2	0	0	0.032	0	Onco	1	0
GUAY 37	GUAY	F	6	2013	N	P	0	1	0	0	0.154	0	Onco	1	0
GUAY 38	GUAY	F	8	2013	N	P	0	3	0	0	0.113	0	Onco	1	0
GUAY 39	GUAY	F	8	2013	N	P	0	2	0	0	0.021	0	Onco	1	0
GUAY 21	GUAY	M		2013	N						0	0	Onco	1	0
GUAY 23	GUAY	F		2013	N						0	0	Onco	1	0
GUAY 29	GUAY	M	5	2013	N	N	0	0	0	0	0.098	0	Onco	1	0
GUAY 33	GUAY	M		2013	N						0	0	Onco	1	0
GUAY 35	GUAY	M		2013	N	P	0	1	0	0	0.027	0	Onco	1	0
GUAY 36	GUAY	M	10	2013	N	P	0	3	1	0	0.122	0	Onco	1	0
PARE 01	PARE	F	13	2013	N	P	0	3	0	0	0	0	Onco	1	0
PARE 02	PARE	F	11	2013	N	P	0	1	0	0	0	0	Onco	1	0
PARE 03	PARE	M	6	2013	N	P	0	3	0	0	0.031	0	Onco	1	0
PARE 04	PARE	M	8	2013	N	P	0	4	0	0	0.139	0	Onco	1	0
PARE 05	PARE	M	10	2013	N	P	0	3	0	0	0	0	Onco	1	0
PARE 06	PARE	F	8	2013	N	P	0	3	0	0	0	0	Onco	1	0
PARE 07	PARE	F	9	2013	N	P	0	1	0	0	0	0	Onco	1	0
PARE 08	PARE	F	6	2013	N	N	0	0	0	0	0.007	0	Onco	1	0
PARE 09	PARE	F	10	2013	N	P	0	3	0	0	0.046	0	Onco	1	0
PARE 10	PARE	M	11	2013	N	N	0	0	0	0	0	0	Onco	1	0
PARE 11	PARE	F	15	2013	N	P	0	2	0	0	0	0	Onco	1	0
PARE 12	PARE	F	11	2013	N	P	0	0	0	0	0.816	2	Onco	3	1
PARE 13	PARE	M	14	2013	N	P	0	2	0	1	0	0	Onco	1	0
PARE 14	PARE	M	5	2013	N	N	0	0	0	0	0	0	Onco	1	0
PARE 15	PARE	F	4	2013	N	P	0	4	0	0	0.033	0	Onco	1	0
PARE 16	PARE	F	12	2013	N	P	0	4	1	0	0	0	Onco	1	0
PARE 17	PARE	M	10	2013	N	P	0	3	0	0	0.007	0	Onco	1	0
PARE 18	PARE	M	12	2013	N	P	0	1	0	1	0.045	0	Onco	1	0
PARE 19	PARE	M	14	2013	N	P	0	1	0	0	0	0	Onco	1	0
PARE 20	PARE	M	10	2013	N	P	0	3	0	0	0.298	1	Onco	2	0
PARE 21	PARE	M	12	2013	M	P	0	2	0	1	0	0	Onco	1	0
PARE 22	PARE	M	9	2013	N	P	0	4	0	0	0.093	0	Onco	1	0
PARE 23	PARE	M		2013	N						-0.002	0	Onco	1	0
PARE 24	PARE	F	6	2013	N	P	0	2	0	0	0.099	0	Onco	1	0
PARE 25	PARE	F	5	2013	N	P	0	4	0	0	0	0	Onco	1	0
PARE 26	PARE	M	4	2013	N	P	0	1	0	0	0.065	0	Onco	1	0
PARE 27	PARE	M	6	2013	N	P	0	1	0	0	0.027	0	Onco	1	0
M501	BORB	F	41	2013	N	N	0	0	0	0	0.06	0	Not	1	0
M502	BORB	F	39	2013	N	P	0	1	0	0	0.021	0	Not	1	0
M503	BORB	F	34	2013	N	N	0	0	0	0	0.001	0	Not	1	0
M504	BORB	M	57	2013	M	N	0	0	0	0	0	0	Not	1	0
M505	BORB	F	37	2013	B	N	0	0	0	0	0.314	1	Not	2	0
M506	BORB	F	40	2013	N	N	0	0	0	0	0.177	0	Not	1	0
M507	BORB	F	30	2013	M	N	0	0	0	0	0.653	2	Not	3	1
M508	BORB	F	70	2013	N	N	0	0	0	0	0.063	0	Not	1	0
M509	BORB	F	36	2013	N	N	0	0	0	0	0.298	1	Not	2	0
M510	BORB	F	38	2013	N	N	0	0	0	0	0.016	0	Not	1	0
M511	BORB	F	26	2013	N	P	1	0	0	1	1.711	2	Not	3	1
M512	BORB	F	31	2013	N	N	0	0	0	0	1.508	2	Not	3	1
M513	BORB	F	38	2013	B	P	0	0	0	1	0.199	0	Not	1	0
M514	BORB	F	43	2013	N	N	0	0	0	0	0.074	0	Not	1	0
M515	BORB	F	50	2013	M	P	0	1	1	0	0.025	0	Not	1	0
M516	BORB	F	50	2013	M	N	0	0	0	0	0	0	Not	1	0
M517	BORB	F	43	2013	N	P	0	2	0	0	0.282	1	Not	2	0
M518	BORB	F	52	2013	N	P	0	3	0	0	0.031	0	Not	1	0
M519	BORB	F	33	2013	N	N	0	0	0	0	0.226	1	Not	2	0
M520	BORB	M	52	2013	B	N	0	0	0	0	0.013	0	Not	1	0
M521	BORB	F	39	2013	N	N	0	0	0	0	0.068	0	Not	1	0
M522	BORB	F	45	2013	B	N	0	0	0	0	0.221	1	Not	2	0
M523	BORB	F	34	2013	B	N	0	0	0	0	0.202	1	Not	2	0
M524	TIMB	F	58	2013	N	N	0	0	0	0	0	0	Onco	1	0
M525	BORB	F	27	2013	N	N	0	0	0	0	0.163	0	Not	1	0
M526	BORB	F	58	2013	N	P	0	2	0	0	0.009	0	Not	1	0
M527	BORB	F	53	2013	M	N	0	0	0	0	0.188	0	Not	1	0
M528	BORB	F	31	2013	B	N	0	0	0	0	0.179	0	Not	1	0
M529	BORB	F	38	2013	N	P	0	2	0	0	0.076	0	Not	1	0
M530	BORB	F	31	2013	N	P	0	1	0	0	0.056	0	Not	1	0
M531	BORB	F	24	2013	M	P	0	2	0	1	0.067	0	Not	1	0
M532	BORB	F	35	2013	M	P	0	1	0	0	0.085	0	Not	1	0
M533	BORB	F	43	2013	M	P	0	1	0	1	0.133	0	Not	1	0
M534	BORB	F	21	2013	M	P	0	0	0	1	1.902	2	Not	3	1
M535	BORB	F	54	2013	N	P	0	1	0	0	0.067	0	Not	1	0
M536	BORB	F	40	2013	M	N	0	0	0	0	0.682	2	Not	3	1
M537	BORB	F	28	2013	N	P	0	1	0	0	0	0	Not	1	0
M538	BORB	F	29	2013	N	N	0	0	0	0	0.058	0	Not	1	0
M539	BORB	F	53	2013	N	P	1	1	0	0	0.673	2	Not	3	1
M540	BORB	F	50	2013	N	N	0	0	0	0	0.152	0	Not	1	0
M541	BORB	F	58	2013	N	N	0	0	0	0	0.001	0	Not	1	0
M542	BORB	F	45	2013	N	N	0	0	0	0	0.035	0	Not	1	0
M543	BORB	F	34	2013	B	N	0	0	0	0	0.083	0	Not	1	0
M544	BORB	F	35	2013	M	N	0	0	0	0	0.142	0	Not	1	0
M545	BORB	F	53	2013	N	N	0	0	0	0	0.018	0	Not	1	0
M546	BORB	M	63	2013	M	N	0	0	0	0	0.059	0	Not	1	0
M547	BORB	F	52	2013	N						0.02	0	Not	1	0
M548	BORB	F	33	2013	N	N	0	0	0	0	0.269	1	Not	2	0
M549	RANC	F	69	2013	N	N	0	0	0	0	0.839	2	Not	3	1
M550	BORB	F	66	2013	B	N	0	0	0	0	0.002	0	Not	1	0
M551	BORB	F	41	2013	N	N	0	0	0	0	0.123	0	Not	1	0
M552	RANC	F	40	2013	N	P	0	0	0	1	0.202	1	Not	2	0
M553	BORB	F	64	2013	N	N	0	0	0	0	-0.002	0	Not	1	0
M554	BORB	F	40	2013	N	N	0	0	0	0	0.002	0	Not	1	0
M555	BORB	M	57	2013	N	N	0	0	0	0	0.419	1	Not	2	0
M556	BORB	M	44	2013	N	N	0	0	0	0	0.496	1	Not	2	0
M557	BORB	F	55	2013	N	N	0	0	0	0	0.123	0	Not	1	0
M558	BORB	F	41	2013	N	N	0	0	0	0	0.026	0	Not	1	0
M559	BORB	F	56	2013	M	N	0	0	0	0	0.05	0	Not	1	0
M560	BORB	F	59	2013	M	N	0	0	0	0	0.143	0	Not	1	0
M561	BORB	F	24	2013	N	N	0	0	0	0	0.047	0	Not	1	0
M562	BORB	F	39	2013	N	N	0	0	0	0	0.069	0	Not	1	0
M563	BORB	F	33	2013	N	P	0	1	0	0	0.013	0	Not	1	0
M564	BORB	F	27	2013	N	P	0	1	0	0	0.105	0	Not	1	0
M565	BORB	F	51	2013	N	N	0	0	0	0	0.439	1	Not	2	0
M566	BORB	F	16	2013	N	P	0	0	0	1	0.002	0	Not	1	0
M567	BORB	F	37	2013	N	N	0	0	0	0	0.027	0	Not	1	0
M568	BORB	F	43	2013	N	N	0	0	0	0	0.144	0	Not	1	0
M569	BORB	F	52	2013	N	N	0	0	0	0	-0.001	0	Not	1	0
M570	BORB	F	42	2013	M	P	0	2	0	0	0.433	1	Not	2	0
M571	BORB	F	36	2013	M	P	0	3	0	1	0.335	1	Not	2	0
M572	BORB	F	68	2013	N	P	0	1	0	0	0.004	0	Not	1	0
M573	BORB	F	30	2013	M	P	0	1	0	0	0.145	0	Not	1	0
M574	BORB	M	67	2013	M	N	0	0	0	0	0.105	0	Not	1	0
M575	BORB	F	47	2013	M	N	0	0	0	0	0.002	0	Not	1	0
M576	BORB	F	26	2013	N	N	0	0	0	0	1.309	2	Not	3	1
M577	BORB	F	41	2013	N	N	0	0	0	0	-0.003	0	Not	1	0
M578	BORB	F	50	2013	M	N	0	0	0	0	0.012	0	Not	1	0
M579	BORB	M	38	2013	N	N	0	0	0	0	0.22	1	Not	2	0
M580	BORB	F	23	2013	N	N	0	0	0	0	0.144	0	Not	1	0
M581	BORB	F	33	2013	N	N	0	0	0	0	0.101	0	Not	1	0
M582	BORB	F	34	2013	B	N	0	0	0	0	0.166	0	Not	1	0
M583	BORB	M	45	2013	N	P	0	2	0	0	0.056	0	Not	1	0
M584	BORB	F	33	2013	M	P	0	2	0	1	0.836	2	Not	3	1
M585	BORB	F	32	2013	N	P	0	1	0	0	0.3	1	Not	2	0
M586	BORB	F	47	2013	N	P	0	1	0	1	0.147	0	Not	1	0
M587	BORB	F	44	2013	N	N	0	0	0	0	0.192	0	Not	1	0
M588	BORB	F	19	2013	M	N	0	0	0	0	0.121	0	Not	1	0
M589	BORB	F	26	2013	N	P	0	4	0	1	0.195	0	Not	1	0
M590	BORB	F	36	2013	N	P	0	1	0	0	0.004	0	Not	1	0
M1	BORB	F	8	2013	N	N	0	0	0	0	0.016	0	Not	1	0
M2	BORB	M	9	2013	M	P	0	1	0	0	0.023	0	Not	1	0
M3	BORB	M	8	2013	N	N	0	0	0	0	0.279	1	Not	2	0
M4	BORB	F	11	2013	M	P	0	3	0	0	0.002	0	Not	1	0
M5	BORB	M	8	2013	N	N	0	0	0	0	0	0	Not	1	0
M6	BORB	F	8	2013	N	P	0	0	0	2	0.503	2	Not	3	1
M7	BORB	M	9	2013	M	P	0	0	1	3	0.254	1	Not	2	0
M8	BORB	F	12	2013	M	P	0	4	0	0	0.055	0	Not	1	0
M9	BORB	F	8	2013	M	P	0	3	0	2	0.062	0	Not	1	0
M10	BORB	M	10	2013	N	P	0	3	0	2	0.083	0	Not	1	0
M11	BORB	F	7	2013	N	P	0	1	0	1	0.131	0	Not	1	0
M12	BORB	M	8	2013	N	P	0	1	0	0	0.079	0	Not	1	0
M13	BORB	M	8	2013	N	N	0	0	0	0	0.001	0	Not	1	0
M14	BORB	M	13	2013	N	P	0	2	0	0	0.037	0	Not	1	0
M15	BORB	F	8	2013	M	P	0	1	0	1	0.014	0	Not	1	0
M16	BORB	F	12	2013	M	N	0	0	0	0	0.041	0	Not	1	0
M17	BORB	F	8	2013	M	N	0	0	0	0	0.08	0	Not	1	0
M18	BORB	F	9	2013	N	N	0	0	0	0	0.093	0	Not	1	0
M19	BORB	F	9	2013	N	N	0	0	0	0	0.698	2	Not	3	1
M20	BORB	F	9	2013	N	N	0	0	0	0	0.477	1	Not	2	0
M21	BORB	F	10	2013	N	P	2	4	0	1	0.022	0	Not	1	1
M22	BORB	F	9	2013	M	P	0	2	0	0	0.615	2	Not	3	1
M23	BORB	F	9	2013	N	N	0	0	0	0	0.014	0	Not	1	0
M24	BORB	M	7	2013	B	P	0	1	0	1	0.186	0	Not	1	0
M25	BORB	M	7	2013	B	N	0	0	0	0	0.204	1	Not	2	0
M26	BORB	M	10	2013	N	N	0	0	0	0	0.232	1	Not	2	0
M27	BORB	M	8	2013	M	P	0	0	0	1	0.216	1	Not	2	0
M28	BORB	F	8	2013	N	P	0	2	0	0	0.059	0	Not	1	0
M29	BORB	F	8	2013	B	N	0	0	0	0	0.219	1	Not	2	0
M30	BORB	M	8	2013	N	P	0	2	0	1	0.157	0	Not	1	0
M31	BORB	M	9	2013	M	P	0	4	0	2	1.841	2	Not	3	1
M32	BORB	F	9	2013	M	P	0	2	0	1	0.184	0	Not	1	0
M33	BORB	F	15	2013	B	P	0	1	0	0	0.161	0	Not	1	0
M34	BORB	F	11	2013	M	N	0	0	0	0	0.142	0	Not	1	0
M35	BORB	M	6	2013	N	P	0	1	0	0	0.007	0	Not	1	0
M36	BORB	M	8	2013	N	N	0	0	0	0	0.039	0	Not	1	0
M37	BORB	M	8	2013	N	P	0	0	2	1	0.059	0	Not	1	0
M38	BORB	M	8	2013	N	P	0	1	0	0	0.036	0	Not	1	0
M39	BORB	F	8	2013	N	P	0	1	0	1	0.121	0	Not	1	0
M40	BORB	M	9	2013	M	P	0	1	0	2	0.002	0	Not	1	0
M41	BORB	M	13	2013	N	N	0	0	0	0	-0.004	0	Not	1	0
M42	BORB	F	12	2013	N	N	0	0	0	0	0.074	0	Not	1	0
M43	BORB	F	10	2013	N	P	0	0	0	1	0.125	0	Not	1	0
M44	BORB	F	8	2013	B	P	0	0	0	1	-0.002	0	Not	1	0
M45	BORB	M	8	2013	M	P	0	0	0	1	0.006	0	Not	1	0
M46	BORB	M	9	2013	N	P	0	0	0	1	-0.004	0	Not	1	0
M47	BORB	F	9	2013	M	P	0	2	0	2	0.164	0	Not	1	0
M48	BORB	F	8	2013	N	P	0	2	0	2	0.113	0	Not	1	0
M49	BORB	F	8	2013	N	P	0	1	0	0	1.385	2	Not	3	1
M50	BORB	F	8	2013	M	N	0	0	0	0	0.008	0	Not	1	0
M51	BORB	F	8	2013	M	P	0	3	0	1	0.062	0	Not	1	0
M52	BORB	M	9	2013	N	N	0	0	0	0	0.242	1	Not	2	0
M53	BORB	F	11	2013	M	P	0	3	2	1	0.034	0	Not	1	0
M54	BORB	F	10	2013	N	P	0	1	1	1	0.012	0	Not	1	0
M55	BORB	M	13	2013	M						2.314	2	Not	3	1
M56	BORB	M	9	2013	N	P	0	2	0	0	0.116	0	Not	1	0
M57	BORB	M	8	2013	M	P	0	1	0	1	0.16	0	Not	1	0
M58	BORB	M	9	2013	N	P	0	1	0	0	0	0	Not	1	0
M59	BORB	F	8	2013	N	P	0	1	0	1	0.12	0	Not	1	0
M60	BORB	F	10	2013	N	P	0	1	0	0	-0.002	0	Not	1	0
M61	BORB	F	9	2013	N	N	0	0	0	0	0.057	0	Not	1	0
M62	BORB	F	9	2013	M	N	0	0	0	0	0.049	0	Not	1	0
M63	BORB	M	10	2013	N	P	0	0	1	2	0.974	2	Not	3	1
M64	BORB	F	10	2013	M	P	0	1	1	3	0.163	0	Not	1	0
M65	BORB	F	9	2013	M	N	0	0	0	0	0.077	0	Not	1	0
M66	BORB	M	13	2013	N	P	0	0	0	1	0.001	0	Not	1	0
M67	BORB	F	9	2013	N	N	0	0	0	0	0.042	0	Not	1	0
M68	BORB	F	11	2013	N	P	0	3	0	1	0.042	0	Not	1	0
M69	BORB	F	8	2013	N	P	0	1	0	1	-0.002	0	Not	1	0
M70	BORB	F	9	2013	N						0.074	0	Not	1	0
M71	BORB	M	10	2013	N	N	0	0	0	0	-0.001	0	Not	1	0
M72	BORB	F	10	2013	M	N	0	0	0	0	0.002	0	Not	1	0
M73	BORB	F	10	2013	N	P	0	4	0	2	2.588	2	Not	3	1
M74	BORB	F	12	2013	N	P	0	2	0	1	0.035	0	Not	1	0
M75	BORB	M	8	2013	N	P	0	1	0	0	-0.001	0	Not	1	0
M76	BORB	F	10	2013	N	P	0	3	0	1	0.017	0	Not	1	0
M77	BORB	F	12	2013	N	P	0	2	0	1	0.009	0	Not	1	0
M78	BORB	M	10	2013	M	P	0	4	0	2	-0.004	0	Not	1	0
M79	BORB	F	10	2013	N	P	0	1	0	1	0.005	0	Not	1	0
M80	BORB	M	9	2013	N	P	0	1	0	1	0.007	0	Not	1	0
M81	BORB	M	9	2013	M	P	0	1	0	1	0.036	0	Not	1	0
M82	BORB	F	10	2013	B	P	0	1	0	0	0.151	0	Not	1	0
M83	BORB	F	9	2013	M	N	0	0	0	0	1.633	2	Not	3	1
M84	BORB	M	9	2013	M						-0.003	0	Not	1	0
M85	BORB	F	10	2013	N	P	0	2	0	1	0.007	0	Not	1	0
M86	BORB	M	8	2013	N	P	0	1	0	1	-0.002	0	Not	1	0
M87	BORB	M	14	2013	N	P	0	1	0	1	0	0	Not	1	0
M88	BORB	F	10	2013	N	N	0	0	0	0	0.904	2	Not	3	1
M89	BORB	M	13	2013	N	P	0	2	0	1	2.009	2	Not	3	1
M90	BORB	F	10	2013	M	P	0	0	0	1	-0.001	0	Not	1	0
M91	BORB	M	12	2013	N	P	0	0	0	1	0.006	0	Not	1	0
M92	BORB	M	10	2013	N	P	0	2	0	1	0.173	0	Not	1	0
M93	BORB	M	13	2013	N	P	0	0	0	1	0.02	0	Not	1	0
M94	BORB	F	10	2013	N	P	0	0	0	1	-0.02	0	Not	1	0
M95	BORB	M	11	2013	M	P	0	1	0	0	0.026	0	Not	1	0
M96	BORB	M	10	2013	M	P	0	3	0	1	-0.001	0	Not	1	0
M97	BORB	M	12	2013	M	P	0	2	0	0	-0.001	0	Not	1	0
M98	BORB	M	14	2013	N	N	0	0	0	0	0.133	0	Not	1	0
M99	BORB	M	13	2013	M	P	0	2	0	0	-0.003	0	Not	1	0
M100	BORB	M	13	2013	N	P	0	1	0	1	0.027	0	Not	1	0
M101	BORB	F	9	2013	M	P	0	1	0	1	0.124	0	Not	1	0
M102	BORB	M	10	2013	N	P	0	1	0	1	-0.002	0	Not	1	0
M103	BORB	M	10	2013	N	N	0	0	0	0	0.699	2	Not	3	1
M104	BORB	F	11	2013	M	P	0	2	0	0	0.028	0	Not	1	0
M105	BORB	F	10	2013	N	P	0	2	1	0	0.17	0	Not	1	0
M106	BORB	M	12	2013	M	N	0	0	0	0	0.079	0	Not	1	0
M107	BORB	F	9	2013	M	P	0	1	0	1	0.045	0	Not	1	0
M108	BORB	M	12	2013	N	P	0	1	0	0	0.03	0	Not	1	0
M109	BORB	F	11	2013	N	P	0	2	0	0	1.507	2	Not	3	1
M110	BORB	M	11	2013	M	N	0	0	0	0	0.009	0	Not	1	0
M111	BORB	M	13	2013	N	P	0	1	0	0	0.137	0	Not	1	0
M112	BORB	F	10	2013	M	P	0	2	0	0	0.002	0	Not	1	0
M113	BORB	F	11	2013	N	P	0	1	0	0	0.227	1	Not	2	0
M114	BORB	F	11	2013	M	P	0	1	0	0	0	0	Not	1	0
M115	BORB	F	14	2013	N	N	0	0	0	0	0.014	0	Not	1	0
M116	BORB	F	10	2013	M	P	0	2	0	0	0.023	0	Not	1	0
M117	BORB	F	10	2013	M	N	0	0	0	0	0.006	0	Not	1	0
M118	BORB	F	10	2013	M	P	0	2	0	1	0.09	0	Not	1	0
M119	BORB	F	10	2013	N	P	0	1	0	1	0.018	0	Not	1	0
M120	BORB	F	10	2013	N	P	0	2	0	1	0.031	0	Not	1	0
M121	BORB	M	10	2013	B	P	0	1	0	1	-0.001	0	Not	1	0
M122	BORB	M	13	2013	M	N	0	0	0	0	0	0	Not	1	0
M123	BORB	M	11	2013	M	P	0	4	0	1	-0.004	0	Not	1	0
M124	BORB	M	14	2013	N	P	0	2	0	1	0.008	0	Not	1	0
M125	BORB	M	14	2013	N	N	0	0	0	0	0.035	0	Not	1	0
M126	BORB	M	10	2013	N	N	0	0	0	0	0.009	0	Not	1	0
M127	BORB	F	10	2013	N	N	0	0	0	0	0.002	0	Not	1	0
M128	BORB	M	10	2013	M	N	0	0	0	0	0.001	0	Not	1	0
M129	BORB	F	11	2013	M	N	0	0	0	0	0.047	0	Not	1	0
M130	BORB	M	9	2013	B	N	0	0	0	0	0.005	0	Not	1	0
M131	BORB	F	10	2013	M	N	0	0	0	0	0.004	0	Not	1	0
M132	BORB	F	10	2013	N	P	0	2	0	1	0	0	Not	1	0
M133	BORB	M	12	2013	M	P	0	4	0	0	0.268	1	Not	2	0
M134	BORB	M	13	2013	B	P	0	1	0	0	-0.002	0	Not	1	0
M135	BORB	M	13	2013	B	N	0	0	0	0	0.002	0	Not	1	0
M136	BORB	M	12	2013	B	N	0	0	0	0	0.017	0	Not	1	0
M137	BORB	F	10	2013	M	P	0	2	0	1	0.001	0	Not	1	0
M138	BORB	M	13	2013	B	N	0	0	0	0	0	0	Not	1	0
M139	BORB	M	11	2013	B	N	0	0	0	0	-0.002	0	Not	1	0
M140	BORB	F	12	2013	N	N	0	0	0	0	0.353	1	Not	2	0
M141	BORB	M	12	2013	M	N	0	0	0	0	0.005	0	Not	1	0
M142	BORB	F	10	2013	N	P	0	3	0	2	0.121	0	Not	1	0
M143	BORB	F	12	2013	N	N	0	0	0	0	0.065	0	Not	1	0
M144	BORB	M	13	2013	N	P	0	2	0	1	0.001	0	Not	1	0
M145	BORB	M	11	2013	N	P	0	1	1	0	0.084	0	Not	1	0
M146	BORB	M	11	2013	M	P	0	0	0	1	0	0	Not	1	0
M147	BORB	M	11	2013	N	N	0	0	0	0	0.005	0	Not	1	0
M148	BORB	M	16	2013	M	P	0	2	1	0	0.117	0	Not	1	0
M149	BORB	M	11	2013	N	P	0	2	0	0	0.012	0	Not	1	0
M150	BORB	M	12	2013	M	P	0	2	0	0	0.107	0	Not	1	0
M151	BORB	F	12	2013	B	P	0	1	0	0	0.041	0	Not	1	0
M152	BORB	F	14	2013	B	P	0	1	0	0	0.001	0	Not	1	0
M153	BORB	F	12	2013	N	N	0	0	0	0	-0.002	0	Not	1	0
M154	BORB	F	13	2013	N	P	0	1	0	1	-0.004	0	Not	1	0
M155	BORB	F	12	2013	N	N	0	0	0	0	0.014	0	Not	1	0
M156	BORB	F	11	2013	M	N	0	0	0	0	0	0	Not	1	0
M157	BORB	F	11	2013	N	N	0	0	0	0	0.005	0	Not	1	0
M158	BORB	F	11	2013	N	P	0	0	0	1	0.073	0	Not	1	0
M159	BORB	F	10	2013	N	N	0	0	0	0	0.003	0	Not	1	0
M160	BORB	F	11	2013	M	P	0	0	0	1	0.002	0	Not	1	0
M161	BORB	F	11	2013	M	P	0	0	0	0	0.002	0	Not	1	0
M162	BORB	F	12	2013	M	N	0	0	0	0	-0.003	0	Not	1	0
M163	BORB	F	12	2013	N	P	0	1	0	0	-0.002	0	Not	1	0
M164	BORB	F	12	2013	N	P	0	3	1	2	0.254	1	Not	2	0
M165	BORB	M	11	2013	N	P	0	1	0	0	-0.002	0	Not	1	0
M166	BORB	F	13	2013	N	P	0	1	0	0	0.323	1	Not	2	0
M167	BORB	M	14	2013	N	N	0	0	0	0	0.003	0	Not	1	0
M168	BORB	F	13	2013	N	P	0	2	0	0	1.011	2	Not	3	1
M169	BORB	M	12	2013	N	P	0	1	0	0	0.018	0	Not	1	0
M170	BORB	F	12	2013	M	N	0	0	0	0	0.917	2	Not	3	1
M171	BORB	M	12	2013	M	P	0	0	0	1	-0.003	0	Not	1	0
M172	BORB	F	12	2013	M	N	0	0	0	0	-0.001	0	Not	1	0
M173	BORB	M	12	2013	B	N	0	0	0	0	-0.003	0	Not	1	0
M174	BORB	F	11	2013	M	N	0	0	0	0	0.161	0	Not	1	0
M175	BORB	F	12	2013	M	N	0	0	0	0	0.002	0	Not	1	0
M176	BORB	F	13	2013	N	N	0	0	0	0	0.016	0	Not	1	0
M177	BORB	M	12	2013	N	P	0	2	0	0	-0.003	0	Not	1	0
M178	BORB	M	12	2013	N	P	0	2	0	0	0.001	0	Not	1	0
ANGO A1	ANGO	M	39	2013	N	P	0	2	0	0	-0.076	0	Onco	1	0
ANGO A2	ANGO	M	58	2013	N	P	0	3	0	0	-0.078	0	Onco	1	0
ANGO A3	ANGO	M	53	2013	N	P	0	1	0	0	-0.076	0	Onco	1	0
ANGO A4	ANGO	F	49	2013	N	P	0	2	1	0	-0.056	0	Onco	1	0
ANGO A6	ANGO	F	48	2013	N	P	0	1	0	0	-0.015	0	Onco	1	0
ANGO A7	ANGO	M	27	2013	N	N	0	0	0	0	0.001	0	Onco	1	0
ANGO A8	ANGO	F	31	2013	N	P	0	1	0	0	0.106	0	Onco	1	0
ANGO A9	ANGO	F	53	2013	N	N	0	0	0	0	0.038	0	Onco	1	0
ANGO A10	ANGO	F	58	2013	N	P	0	2	0	0	0.065	0	Onco	1	0
ANGO A11	ANGO	F	22	2013	N	N	0	0	0	0	1.064	2	Onco	3	1
ANGO A12	ANGO	F	24	2013	N	N	0	0	0	0	0.035	0	Onco	1	0
ANGO A13	ANGO	F	20	2013	N	P	0	1	0	0	0.083	0	Onco	1	0
ANGO A15	ANGO	M	26	2013	N	P	0	1	0	0	0.026	0	Onco	1	0
ANGO A16	ANGO	F	49	2013	N	P	1	1	0	0	0.013	0	Onco	1	1
ANGO A17	ANGO	F	26	2013	N	N	0	0	0	0	0.109	0	Onco	1	0
ANGO A18	ANGO	M	60	2013	N	P	0	1	0	1	0.141	0	Onco	1	0
ANGO A19	ANGO	M	22	2013	N	N	0	0	0	0	0.2	1	Onco	2	0
PARE A1	PARE	F	67	2013	N	N	0	0	0	0	0.15	0	Onco	1	0
PARE A2	PARE	F		2013	N	P	0	1	0	0	0.281	1	Onco	2	0
PARE A3	PARE	F	36	2013	N	N	0	0	0	0	0.113	0	Onco	1	0
PARE A4	PARE	F	28	2013	N	P	0	1	0	0	0.044	0	Onco	1	0
PARE A5	PARE	F		2013	N	P	0	1	0	0	0.106	0	Onco	1	0
PARE A6	PARE	F	51	2013	N	P	0	1	0	0	0.375	1	Onco	2	0
PARE A7	PARE	F	46	2013	N	N	0	0	0	0	0.045	0	Onco	1	0
PARE A8	PARE	M		2013	N	P	0	1	0	0	0.059	0	Onco	1	0
PARE A9	PARE	F	20	2013	N	P	0	1	0	0	0.156	0	Onco	1	0
PARE A10	PARE	F	24	2013	N	N	0	0	0	0	0.051	0	Onco	1	0
PARE A11	PARE	F		2013	N	N	0	0	0	0	0.055	0	Onco	1	0
PARE A12	PARE	M	26	2013	N	P	0	4	0	0	0.019	0	Onco	1	0
PARE A13	PARE	F	30	2013	N						0.043	0	Onco	1	0
PARE A14	PARE	F	43	2013	N						0.005	0	Onco	1	0
PLOR A1	PLOR	F	82	2013	N	N	0	0	0	0	-0.073	0	Onco	1	0
PLOR A10	PLOR	M	37	2013	N	N	0	0	0	0	-0.072	0	Onco	1	0
PLOR A100	PLOR	M	41	2013	N	N	0	0	0	0	-0.075	0	Onco	1	0
PLOR A12	PLOR	M	43	2013	N	P	0	1	0	0	-0.076	0	Onco	1	0
PLOR A13	PLOR	F	35	2013	N	N	0	0	0	0	-0.068	0	Onco	1	0
PLOR A14	PLOR	M	59	2013	M	P	0	2	0	0	0.645	2	Onco	3	1
PLOR A15	PLOR	F	39	2013	N	P	0	1	0	0	-0.072	0	Onco	1	0
PLOR A16	PLOR	M	19	2013	N	P	0	1	0	0	-0.048	0	Onco	1	0
PLOR A17	PLOR	F	46	2013	N	P	0	1	0	0	-0.077	0	Onco	1	0
PLOR A18	PLOR	F	36	2013	N	P	0	1	0	0	-0.073	0	Onco	1	0
PLOR A19	PLOR	M	44	2013	N	N	0	0	0	0	-0.077	0	Onco	1	0
PLOR A2	PLOR	F	59	2013	N	P	0	2	0	0	-0.076	0	Onco	1	0
PLOR A20	PLOR	M	31	2013	N	N	0	0	0	0	0.109	0	Onco	1	0
PLOR A21	PLOR	M	46	2013	N	N	0	0	0	0	-0.071	0	Onco	1	0
PLOR A22	PLOR	M	44	2013	N	N	0	0	0	0	-0.029	0	Onco	1	0
PLOR A23	PLOR	M	14	2013	N	N	0	0	0	0	-0.071	0	Onco	1	0
PLOR A25	PLOR	M	49	2013	N	N	0	0	0	0	-0.075	0	Onco	1	0
PLOR A26	PLOR	F	70	2013	N	N	0	0	0	0	-0.061	0	Onco	1	0
PLOR A27	PLOR	F	76	2013	N	N	0	0	0	0	-0.076	0	Onco	1	0
PLOR A28	PLOR	F	35	2013	N	P	0	1	1	0	-0.076	0	Onco	1	0
PLOR A29	PLOR	F	55	2013	N	N	0	0	0	0	-0.052	0	Onco	1	0
PLOR A3	PLOR	M	72	2013	N	N	0	0	0	0	0.116	0	Onco	1	0
PLOR A30	PLOR	M	35	2013	N	P	0	3	0	1	-0.076	0	Onco	1	0
PLOR A31	PLOR	M	67	2013	N	N	0	0	0	0	0.062	0	Onco	1	0
PLOR A32	PLOR	M	58	2013	N	N	0	0	0	0	-0.073	0	Onco	1	0
PLOR A33	PLOR	M	34	2013	N	P	0	1	0	0	0.019	0	Onco	1	0
PLOR A34	PLOR	M	58	2013	N	N	0	0	0	0	-0.07	0	Onco	1	0
PLOR A35	PLOR	F	31	2013	N	N	0	0	0	0	0.052	0	Onco	1	0
PLOR A36	PLOR	F	27	2013	N	P	0	1	0	0	-0.05	0	Onco	1	0
PLOR A37	PLOR	F	68	2013	N	N	0	0	0	0	0.029	0	Onco	1	0
PLOR A38	PLOR	M		2013	N						-0.057	0	Onco	1	0
PLOR A39	PLOR	F	58	2013	N	P	0	1	0	0	0.117	0	Onco	1	0
PLOR A4	PLOR	M	38	2013	N	P	0	2	0	0	0.166	0	Onco	1	0
PLOR A40	PLOR	F	23	2013	N	N	0	0	0	0	-0.073	0	Onco	1	0
PLOR A41	PLOR	F	22	2013	N	N	0	0	0	0	-0.074	0	Onco	1	0
PLOR A42	PLOR	M	32	2013	N	N	0	0	0	0	-0.062	0	Onco	1	0
PLOR A43	PLOR	F	43	2013	N	N	0	0	0	0	-0.005	0	Onco	1	0
PLOR A44	PLOR	F	16	2013	N	P	0	3	0	0	-0.079	0	Onco	1	0
PLOR A45	PLOR	M	34	2013	N	N	0	0	0	0	-0.077	0	Onco	1	0
PLOR A46	PLOR	F	59	2013	N	N	0	0	0	0	-0.08	0	Onco	1	0
PLOR A47	PLOR	F	73	2013	N	P	0	3	1	1	-0.064	0	Onco	1	0
PLOR A48	PLOR	M	38	2013	N	P	0	2	0	0	-0.071	0	Onco	1	0
PLOR A49	PLOR	F	38	2013	N	P	0	2	0	0	-0.079	0	Onco	1	0
PLOR A5	PLOR	M	40	2013	N	P	0	2	0	0	-0.056	0	Onco	1	0
PLOR A50	PLOR	M	33	2013	N	P	0	1	0	0	-0.077	0	Onco	1	0
PLOR A51	PLOR	F	71	2013	N	N	0	0	0	0	-0.074	0	Onco	1	0
PLOR A52	PLOR	F	33	2013	N	N	0	0	0	0	-0.077	0	Onco	1	0
PLOR A53	PLOR	F	80	2013	N	P	0	1	0	0	-0.076	0	Onco	1	0
PLOR A54	PLOR	F	49	2013	N	P	0	1	0	0	-0.072	0	Onco	1	0
PLOR A55	PLOR	M	30	2013	N	P	0	1	0	0	-0.077	0	Onco	1	0
PLOR A56	PLOR	F	31	2013	N	N	0	0	0	0	-0.072	0	Onco	1	0
PLOR A57	PLOR	F	42	2013	N	P	0	1	0	0	-0.076	0	Onco	1	0
PLOR A58	PLOR	F	43	2013	N	P	0	2	0	0	-0.074	0	Onco	1	0
PLOR A59	PLOR	M	32	2013	N	P	0	1	0	0	0.635	2	Onco	3	1
PLOR A6	PLOR	M	50	2013	N	P	0	1	0	0	-0.074	0	Onco	1	0
PLOR A60	PLOR	M	32	2013	N	P	0	2	0	0	-0.076	0	Onco	1	0
PLOR A61	PLOR	M	54	2013	N	P	0	3	0	0	-0.075	0	Onco	1	0
PLOR A62	PLOR	M	33	2013	N	P	0	3	0	0	-0.078	0	Onco	1	0
PLOR A63	PLOR	F	41	2013	N	N	0	0	0	0	0.175	0	Onco	1	0
PLOR A64	PLOR	M	31	2013	N	P	0	2	0	0	-0.073	0	Onco	1	0
PLOR A65	PLOR	F	41	2013	N	N	0	0	0	0	-0.074	0	Onco	1	0
PLOR A66	PLOR	M	20	2013	N	N	0	0	0	0	-0.078	0	Onco	1	0
PLOR A68	PLOR	M		2013	N						-0.038	0	Onco	1	0
PLOR A69	PLOR	F	42	2013	N						-0.075	0	Onco	1	0
PLOR A7	PLOR	F	40	2013	N	P	0	2	0	0	-0.077	0	Onco	1	0
PLOR A70	PLOR	F	38	2013	N	N	0	0	0	0	-0.077	0	Onco	1	0
PLOR A71	PLOR	M	17	2013	N	N	0	0	0	0	-0.075	0	Onco	1	0
PLOR A72	PLOR	M		2013	N						0.127	0	Onco	1	0
PLOR A73	PLOR	F	15	2013	N	N	0	0	0	0	-0.074	0	Onco	1	0
PLOR A74	PLOR	F	81	2013	N	P	0	1	0	0	0	0	Onco	1	0
PLOR A75	PLOR	F	20	2013	N	N	0	0	0	0	-0.075	0	Onco	1	0
PLOR A76	PLOR	M		2013	N						-0.075	0	Onco	1	0
PLOR A77	PLOR	F		2013	N						-0.075	0	Onco	1	0
PLOR A78	PLOR	M		2013	N	N	0	0	0	0	-0.077	0	Onco	1	0
PLOR A79	PLOR	F	17	2013	N	N	0	0	0	0	-0.06	0	Onco	1	0
PLOR A8	PLOR	M	58	2013	N	P	0	3	0	0	0.197	0	Onco	1	0
PLOR A80	PLOR	M		2013	N						-0.074	0	Onco	1	0
PLOR A81	PLOR	M	80	2013	N	N	0	0	0	0	0.097	0	Onco	1	0
PLOR A82	PLOR	F	27	2013	N	N	0	0	0	0	-0.06	0	Onco	1	0
PLOR A83	PLOR	F	16	2013	N	N	0	0	0	0	-0.076	0	Onco	1	0
PLOR A84	PLOR	M	20	2013	N	N	0	0	0	0	-0.063	0	Onco	1	0
PLOR A85	PLOR	M		2013	N						-0.076	0	Onco	1	0
PLOR A86	PLOR	M		2013	N						-0.08	0	Onco	1	0
PLOR A87	PLOR	M		2013	N						-0.054	0	Onco	1	0
PLOR A88	PLOR	F	37	2013	N	P	0	3	0	0	0.073	0	Onco	1	0
PLOR A89	PLOR	F	54	2013	N	N	0	0	0	0	0.001	0	Onco	1	0
PLOR A9	PLOR	F	19	2013	N						-0.074	0	Onco	1	0
PLOR A90	PLOR	F	43	2013	N	P	0	2	0	0	-0.07	0	Onco	1	0
PLOR A91	PLOR	F	87	2013	N	N	0	0	0	0	-0.074	0	Onco	1	0
PLNU A1	PLNU	F	22	2013	N	N	0	0	0	0	0.047	0	Onco	1	0
PLNU A2	PLNU	M	58	2013	N	N	0	0	0	0	0.094	0	Onco	1	0
PLNU A4	PLNU	F	54	2013	N	N	0	0	0	0	0.012	0	Onco	1	0
PLNU A5	PLNU	F	25	2013	N	N	0	0	0	0	0.154	0	Onco	1	0
PLNU A6	PLNU	F	20	2013	N	N	0	0	0	0	0.045	0	Onco	1	0
PLNU A7	PLNU	F	62	2013	N	N	0	0	0	0	0.274	1	Onco	2	0
PLNU A8	PLNU	F	20	2013	N	N	0	0	0	0	0.05	0	Onco	1	0
PLNU A9	PLNU	M	68	2013	N	N	0	0	0	0	0.013	0	Onco	1	0
PLNU A10	PLNU	F	55	2013	N	P	0	0	0	1	0.128	0	Onco	1	0
PLNU A11	PLNU	F	27	2013	N	P	0	1	0	0	0.078	0	Onco	1	0
PLNU A12	PLNU	F	24	2013	N	P	0	2	0	0	0.005	0	Onco	1	0
PLTI A1	PLTI	F	72	2013	N						0.008	0	Onco	1	0
PLTI A2	PLTI	F	49	2013	N						0.055	0	Onco	1	0
PLTI A3	PLTI	F	83	2013	N						0.232	1	Onco	2	0
PLTI A4	PLTI	F	27	2013	N						0.069	0	Onco	1	0
PLTI A6	PLTI	F	60	2013	N						0.009	0	Onco	1	0
PLTI A7	PLTI	M	60	2013	N						0.324	1	Onco	2	0
PLTI A8	PLTI	M	29	2013	N						0.172	0	Onco	1	0
PLTI A9	PLTI	M	22	2013	N						0.014	0	Onco	1	0
PLTI A10	PLTI	F	65	2013	N						0.178	0	Onco	1	0
PLTI A11	PLTI	M	76	2013	N						0.033	0	Onco	1	0
PLTI A12	PLTI	M	61	2013	N						0.102	0	Onco	1	0
PLTI A14	PLTI	M	34	2013	N						0.129	0	Onco	1	0
PLTI A15	PLTI	M	37	2013	N						0.46	1	Onco	2	0
PLTI A16	PLTI	M	59	2013	N						0.033	0	Onco	1	0
PLTI A17	PLTI	M	22	2013	N						0.004	0	Onco	1	0
PLTI A18	PLTI	F	74	2013	N						0.006	0	Onco	1	0
PLTI A19	PLTI	F	88	2013	N						0.185	0	Onco	1	0
PLTI A20	PLTI	F	31	2013	N						0.013	0	Onco	1	0
PLTI A21	PLTI	F	34	2013	N						0.086	0	Onco	1	0
PLTI A22	PLTI	F	32	2013	N						0.017	0	Onco	1	0
PLTI A25	PLTI	M	53	2013	N						0.007	0	Onco	1	0
PLTI A26	PLTI	F	56	2013	N						0.01	0	Onco	1	0
PLTI A27	PLTI	F	53	2013	N						0.222	1	Onco	2	0
PLTI A28	PLTI	F	59	2013	N						0.023	0	Onco	1	0
ZAPO A1	ZAPO	F	54	2013	N	N	0	0	0	0	0.056	0	Onco	1	0
ZAPO A2	ZAPO	F	47	2013	N	N	0	0	0	0	0.004	0	Onco	1	0
ZAPO A3	ZAPO	F	24	2013	N	P	0	1	0	0	0.09	0	Onco	1	0
ZAPO A4	ZAPO	F	36	2013	N	P	0	0	1	0	0.098	0	Onco	1	0
ZAPO A5	ZAPO	M	39	2013	N	P	0	0	1	0	0.082	0	Onco	1	0
ZAPO A6	ZAPO	M	45	2013	N	P	0	1	0	0	0.026	0	Onco	1	0
ZAPO A7	ZAPO	F	33	2013	N	N	0	0	0	0	0.095	0	Onco	1	0
ZAPO A8	ZAPO	M		2013	N	P	0	1	0	0	0.094	0	Onco	1	0
ZAPO A9	ZAPO	M	27	2013	N	P	0	1	2	0	0.066	0	Onco	1	0
ZAPO A10	ZAPO	M	28	2013	N	N	0	0	0	0	0.38	1	Onco	2	0
ZAPO A11	ZAPO	M	15	2013	N	P	0	1	0	0	0.045	0	Onco	1	0
ZAPO A12	ZAPO	F	42	2013	N	P	0	1	0	0	0.098	0	Onco	1	0
ZAPO A13	ZAPO	M	36	2013	N	P	0	0	1	0	0.074	0	Onco	1	0
ZAPO A14	ZAPO	M	57	2013	N	N	0	0	0	0	0.235	1	Onco	2	0
ZAPO A15	ZAPO	M	44	2013	N	N	0	0	0	0	0.08	0	Onco	1	0
ZAPO A16	ZAPO	F	17	2013	N	N	0	0	0	0	0.001	0	Onco	1	0
M 591	BORB	F	43	2013	N	N	0	0	0	0	0.478	1	Not	2	0
M 592	BORB	F	19	2013	N	N	0	0	0	0	0.261	1	Not	2	0
M 593	BORB	F	54	2013	N	P	0	1	0	0	0.079	0	Not	1	0
M 594	BORB	F	16	2013	N	P	0	1	0	0	0.078	0	Not	1	0
M 595	BORB	F	35	2013	N	P	0	0	0	1	0.209	1	Not	2	0
M 596	BORB	F	23	2013	N	P	0	2	0	0	0.109	0	Not	1	0
M 597	BORB	M	43	2013	N	P	0	1	0	0	0.057	0	Not	1	0
M 598	BORB	M	64	2013	N	P	0	1	0	0	0.408	1	Not	2	0
M 599	BORB	F	38	2013	N	N	0	0	0	0	-0.018	0	Not	1	0
M 600	BORB	F	26	2013	N	N	0	0	0	0	0.104	0	Not	1	0
M 601	BORB	M	38	2013	N	P	0	1	0	0	2.274	2	Not	3	1
M 602	BORB	F	21	2013	N	P	0	1	0	0	0.126	0	Not	1	0
M 603	BORB	F	45	2013	N	P	0	1	0	0	0.468	1	Not	2	0
M 604	BORB	F	50	2013	N	N	0	0	0	0	0.261	1	Not	2	0
M 605	BORB	F	21	2013	N	N	0	0	0	0	-0.011	0	Not	1	0
M 606	BORB	F	49	2013	N	P	0	2	0	0	0.102	0	Not	1	0
M 607	BORB	M	53	2013	N	P	0	1	0	0	0.071	0	Not	1	0
M 608	BORB	F	57	2013	N	N	0	0	0	0	0.088	0	Not	1	0
M 609	BORB	F	79	2013	N	P	0	0	0	1	0.004	0	Not	1	0
M 610	BORB	M	20	2013	N	P	0	1	0	0	0.103	0	Not	1	0
M 611	BORB	F	78	2013	N	N	0	0	0	0	0.382	1	Not	2	0
M 612	BORB	M	24	2013	N	P	0	2	0	0	0.147	0	Not	1	0
M 613	BORB	F	27	2013	N	P	0	1	0	0	0.353	1	Not	2	0
M 614	BORB	F	66	2013	N	N	0	0	0	0	0.137	0	Not	1	0
M 615	BORB	M	18	2013	N	P	0	2	0	1	-0.01	0	Not	1	0
M 616	BORB	F	44	2013	N	N	0	0	0	0	0.094	0	Not	1	0
M 617	BORB	F	46	2013	N	N	0	0	0	0	-0.023	0	Not	1	0
M 618	BORB	F	42	2013	N	P	0	1	0	0	-0.024	0	Not	1	0
M 619	BORB	M	80	2013	N	N	0	0	0	0	0.127	0	Not	1	0
M 620	BORB	F	77	2013	N						0.235	1	Not	2	0
M 621	BORB	F	59	2013	N	N	0	0	0	0	1.252	2	Not	3	1
M 622	BORB	F	57	2013	N	P	1	0	0	0	1.462	2	Not	3	1
M 623	BORB	F	40	2013	N	N	0	0	0	0	0.188	0	Not	1	0
M 624	BORB	M	49	2013	N	P	1	2	0	1	1.306	2	Not	3	1
M 625	BORB	F	31	2013	N	P	0	1	0	1	0.487	1	Not	2	0
M 626	BORB	F	43	2013	N	N	0	0	0	0	0.111	0	Not	1	0
M 627	BORB	F	64	2013	N	N	0	0	0	0	2.025	2	Not	3	1
M 628	BORB	F	50	2013	N	N	0	0	0	0	0.105	0	Not	1	0
M 629	BORB	M	40	2013	N	P	0	2	0	0	2.019	2	Not	3	1
RANC 1	RANC	F	61	2013	N	P	0	2	0	0	0.093	0	Not	1	0
RANC 2	RANC	F	33	2013	N	P	0	2	0	1	0.272	1	Not	2	0
RANC 3	RANC	M	44	2013	N	N	0	0	0	0	0.599	2	Not	3	1
RANC 4	RANC	F	67	2013	N	N	0	0	0	0	0.161	0	Not	1	0
RANC 5	RANC	M	21	2013	N	P	0	2	0	0	0.078	0	Not	1	0
RANC 6	RANC	M	31	2013	N	P	0	2	0	0	1.276	2	Not	3	1
RANC 7	RANC	M	18	2013	N	P	0	1	0	0	0.669	2	Not	3	1
RANC 8	RANC	F	37	2013	N	P	0	2	0	1	0.735	2	Not	3	1
RANC 9	RANC	F	36	2013	N	N	0	0	0	0	0.1	0	Not	1	0
PAMP 1	PAMP	F	61	2013	N	P	0	1	0	0	0.253	1	Not	2	0
PAMP 2	PAMP	M	76	2013	N	P	0	1	0	1	0.336	1	Not	2	0
PAMP 3	PAMP	M		2013	N	N	0	0	0	0	2.294	2	Not	3	1
PAMP 4	PAMP	F	50	2013	N	N	0	0	0	0	0.343	1	Not	2	0
PAMP 5	PAMP	F	27	2013	N	P	0	4	0	1	0.256	1	Not	2	0
PAMP 6	PAMP	F	36	2013	N	P	0	4	0	1	0.781	2	Not	3	1
PAMP 7	PAMP	F	26	2013	N	P	0	2	0	1	0.434	1	Not	2	0
PAMP 8	PAMP	F	14	2013	N	P	0	1	0	0	0.874	2	Not	3	1
PAMP 9	PAMP	F	75	2013	N	P	0	1	0	0	0.018	0	Not	1	0
PAMP 10	PAMP	M	59	2013	N	P	0	2	0	2	0.097	0	Not	1	0
PAMP 11	PAMP	M	54	2013	N	P	0	2	0	1	1.729	2	Not	3	1
PAMP 12	PAMP	F	69	2013	N	P	0	1	0	1	0.826	2	Not	3	1
PAMP 13	PAMP	F	20	2013	N	P	0	0	1	0	1.259	2	Not	3	1
PAMP 14	PAMP	F	19	2013	N	N	0	0	0	0	0.173	0	Not	1	0
PAMP 15	PAMP	F	21	2013	N	P	0	1	0	1	0.173	0	Not	1	0
PAMP 16	PAMP	F	19	2013	N	P	0	2	0	1	0.169	0	Not	1	0
PAMP 17	PAMP	F	63	2013	N	P	0	1	0	1	0.547	2	Not	3	1
PAMP 18	PAMP	M	66	2013	N	N	0	0	0	0	2.277	2	Not	3	1
PAMP 19	PAMP	M	31	2013	N	P	0	2	0	0	0.833	2	Not	3	1
PAMP 20	PAMP	F	38	2013	N	P	0	1	0	0	0.778	2	Not	3	1
PAMP 21	PAMP	F	32	2013	N	N	0	0	0	0	0.137	0	Not	1	0
PAMP 22	PAMP	F	16	2013	N	N	0	0	0	0	0.134	0	Not	1	0
PAMP 23	PAMP	M	33	2013	N	N	0	0	0	0	0.198	0	Not	1	0
PAMP 24	PAMP	F	31	2013	N	P	0	1	1	2	1.335	2	Not	3	1
PAMP 25	PAMP	F	16	2013	N	P	0	3	0	0	0.006	0	Not	1	0
PARE A15				2013		P	0	2	0	0
PLNU A3				2013		P	0	1	0	0
ZAPO 18				2013		P	0	0	1	0
ANGO A5				2013		N	0	0	0	0
ANGO A14				2013		P	0	3	0	0
PLOR A24				2013		N	0	0	0	0

## Sheet: 1999_NotOncho
1999	Età	Genere	Anno	EMCCEhisto_dispar	EMCTEhisto_dispar	EMCCalterate	EMCCEcoli	EMCTEcoli	EMCCEnana	EMCTEnana	EMCCIbutschlii	EMCTIbutschlii	EMCCEhartmanni	EMCTEhartmanni	EMCCEpolecki	EMCTEpolecki	EMCAltro	EMCCGlamblia	EMCTGlamblia	EMCCCmesnili	EMCTCmesnili	EMCIbelli	EMCShominis	EMCAlumbricoides	EMCTtrichiura	EMCAncilostomatide	EMCSstercoralis
1	11	S	1999	FALSE	FALSE	FALSE	TRUE	FALSE	TRUE	FALSE	FALSE	FALSE	FALSE	FALSE	FALSE	FALSE		FALSE	FALSE	FALSE	FALSE	FALSE	FALSE	TRUE	TRUE	FALSE	TRUE
2	9	M	1999	FALSE	FALSE	FALSE	TRUE	TRUE	TRUE	FALSE	FALSE	FALSE	TRUE	FALSE	FALSE	FALSE		TRUE	FALSE	FALSE	FALSE	FALSE	FALSE	FALSE	FALSE	FALSE	FALSE
3	10	M	1999	FALSE	FALSE	TRUE	TRUE	TRUE	FALSE	FALSE	TRUE	FALSE	TRUE	FALSE	FALSE	FALSE	T. E. hominis	FALSE	FALSE	FALSE	FALSE	FALSE	FALSE	TRUE	TRUE	FALSE	FALSE
4	12	M	1999	FALSE	FALSE	FALSE	FALSE	FALSE	FALSE	FALSE	FALSE	FALSE	TRUE	FALSE	FALSE	FALSE		FALSE	FALSE	FALSE	FALSE	FALSE	FALSE	TRUE	TRUE	FALSE	TRUE
5	9	M	1999	FALSE	FALSE	FALSE	FALSE	FALSE	TRUE	FALSE	TRUE	FALSE	TRUE	FALSE	FALSE	FALSE	B. hominis	FALSE	FALSE	FALSE	FALSE	FALSE	FALSE	TRUE	TRUE	FALSE	TRUE
6	10	M	1999	FALSE	FALSE	FALSE	TRUE	FALSE	TRUE	FALSE	TRUE	FALSE	FALSE	FALSE	FALSE	FALSE		FALSE	FALSE	FALSE	FALSE	FALSE	FALSE	TRUE	TRUE	FALSE	FALSE
7	10	M	1999	FALSE	FALSE	FALSE	FALSE	FALSE	FALSE	FALSE	FALSE	FALSE	FALSE	FALSE	FALSE	FALSE		TRUE	FALSE	FALSE	FALSE	FALSE	FALSE	TRUE	TRUE	FALSE	FALSE
8	7	M	1999	FALSE	FALSE	FALSE	FALSE	FALSE	FALSE	FALSE	FALSE	FALSE	FALSE	FALSE	FALSE	FALSE	C. 13 mic.	TRUE	FALSE	FALSE	FALSE	FALSE	FALSE	FALSE	TRUE	FALSE	FALSE
9	11	M	1999	TRUE	FALSE	FALSE	TRUE	FALSE	TRUE	FALSE	TRUE	FALSE	TRUE	FALSE	FALSE	FALSE	Cisti ??	FALSE	FALSE	FALSE	FALSE	FALSE	FALSE	TRUE	TRUE	TRUE	FALSE
10	9	F	1999	FALSE	FALSE	FALSE	FALSE	FALSE	FALSE	FALSE	FALSE	FALSE	FALSE	FALSE	FALSE	FALSE	T. vulpis	FALSE	FALSE	FALSE	FALSE	FALSE	FALSE	TRUE	TRUE	FALSE	FALSE
11	9	F	1999	TRUE	FALSE	FALSE	TRUE	FALSE	FALSE	FALSE	TRUE	FALSE	TRUE	FALSE	FALSE	FALSE	Cisti ??	FALSE	FALSE	FALSE	FALSE	FALSE	FALSE	TRUE	TRUE	TRUE	FALSE
12	12	F	1999	TRUE	FALSE	FALSE	TRUE	FALSE	FALSE	FALSE	TRUE	FALSE	TRUE	FALSE	FALSE	FALSE		FALSE	FALSE	FALSE	FALSE	FALSE	FALSE	TRUE	TRUE	TRUE	FALSE
13	11	M	1999	FALSE	FALSE	FALSE	TRUE	FALSE	FALSE	FALSE	FALSE	FALSE	FALSE	FALSE	FALSE	FALSE	B. hominis	FALSE	FALSE	TRUE	FALSE	FALSE	FALSE	FALSE	FALSE	FALSE	FALSE
14	11	M	1999	FALSE	FALSE	TRUE	TRUE	TRUE	FALSE	FALSE	TRUE	FALSE	TRUE	FALSE	FALSE	FALSE	T. vulpis	FALSE	FALSE	FALSE	FALSE	FALSE	FALSE	FALSE	TRUE	FALSE	FALSE
15	9	F	1999	FALSE	FALSE	FALSE	TRUE	TRUE	FALSE	FALSE	FALSE	FALSE	FALSE	FALSE	FALSE	FALSE		FALSE	FALSE	FALSE	FALSE	FALSE	FALSE	FALSE	FALSE	FALSE	FALSE
16	9	F	1999	FALSE	FALSE	FALSE	FALSE	FALSE	FALSE	FALSE	FALSE	FALSE	FALSE	FALSE	FALSE	FALSE		FALSE	FALSE	FALSE	FALSE	FALSE	FALSE	FALSE	TRUE	FALSE	FALSE
17	13	M	1999	TRUE	FALSE	FALSE	TRUE	TRUE	FALSE	FALSE	TRUE	FALSE	TRUE	FALSE	FALSE	FALSE		FALSE	FALSE	FALSE	FALSE	FALSE	FALSE	FALSE	TRUE	FALSE	FALSE
18	6	M	1999	FALSE	FALSE	FALSE	FALSE	FALSE	FALSE	FALSE	FALSE	FALSE	FALSE	FALSE	FALSE	FALSE		FALSE	FALSE	FALSE	FALSE	FALSE	FALSE	FALSE	TRUE	FALSE	FALSE
19	10	F	1999	FALSE	FALSE	FALSE	FALSE	FALSE	FALSE	FALSE	TRUE	FALSE	TRUE	FALSE	FALSE	FALSE		TRUE	FALSE	FALSE	FALSE	FALSE	FALSE	TRUE	TRUE	FALSE	FALSE
20	12	M	1999	FALSE	FALSE	FALSE	FALSE	FALSE	FALSE	FALSE	FALSE	FALSE	FALSE	FALSE	FALSE	FALSE		FALSE	FALSE	FALSE	FALSE	FALSE	FALSE	TRUE	TRUE	FALSE	FALSE
21	14	M	1999	FALSE	FALSE	FALSE	FALSE	FALSE	FALSE	FALSE	FALSE	FALSE	FALSE	FALSE	FALSE	FALSE		FALSE	FALSE	FALSE	FALSE	FALSE	FALSE	FALSE	TRUE	FALSE	TRUE
22	10	F	1999	FALSE	FALSE	FALSE	TRUE	TRUE	FALSE	FALSE	TRUE	FALSE	TRUE	FALSE	FALSE	FALSE		FALSE	FALSE	FALSE	FALSE	FALSE	FALSE	TRUE	TRUE	FALSE	FALSE
23	9	F	1999	FALSE	FALSE	FALSE	TRUE	FALSE	FALSE	FALSE	FALSE	FALSE	FALSE	FALSE	FALSE	FALSE		FALSE	FALSE	FALSE	FALSE	FALSE	FALSE	TRUE	TRUE	FALSE	TRUE
24	12	M	1999	FALSE	FALSE	FALSE	TRUE	TRUE	FALSE	FALSE	FALSE	FALSE	TRUE	FALSE	FALSE	FALSE	Cisti ??	FALSE	FALSE	FALSE	FALSE	FALSE	FALSE	TRUE	TRUE	TRUE	FALSE
25	13	F	1999	FALSE	FALSE	FALSE	TRUE	TRUE	FALSE	FALSE	FALSE	FALSE	TRUE	FALSE	FALSE	FALSE	Cisti ??	FALSE	FALSE	TRUE	FALSE	FALSE	FALSE	TRUE	TRUE	FALSE	TRUE
26	12	M	1999	TRUE	FALSE	FALSE	TRUE	FALSE	FALSE	FALSE	TRUE	FALSE	TRUE	FALSE	FALSE	FALSE		FALSE	FALSE	FALSE	FALSE	FALSE	FALSE	TRUE	TRUE	TRUE	TRUE
27	11	F	1999	FALSE	FALSE	TRUE	TRUE	TRUE	FALSE	FALSE	FALSE	FALSE	FALSE	FALSE	FALSE	FALSE		FALSE	FALSE	FALSE	FALSE	FALSE	FALSE	TRUE	TRUE	FALSE	FALSE
28	10	F	1999	FALSE	FALSE	FALSE	TRUE	FALSE	FALSE	FALSE	TRUE	FALSE	FALSE	FALSE	FALSE	FALSE		FALSE	FALSE	TRUE	FALSE	FALSE	FALSE	TRUE	TRUE	FALSE	FALSE
29	17	S	1999	FALSE	FALSE	FALSE	TRUE	FALSE	FALSE	FALSE	FALSE	FALSE	TRUE	FALSE	FALSE	FALSE		FALSE	FALSE	FALSE	FALSE	FALSE	FALSE	TRUE	TRUE	TRUE	FALSE
29	15	M	1999	FALSE	FALSE	FALSE	FALSE	FALSE	FALSE	FALSE	FALSE	FALSE	FALSE	FALSE	FALSE	FALSE		FALSE	FALSE	FALSE	FALSE	FALSE	FALSE	FALSE	FALSE	FALSE	FALSE
30	12	M	1999	FALSE	FALSE	FALSE	FALSE	FALSE	FALSE	FALSE	FALSE	FALSE	FALSE	FALSE	FALSE	FALSE		FALSE	FALSE	FALSE	FALSE	FALSE	FALSE	TRUE	TRUE	FALSE	FALSE
31	13	M	1999	FALSE	FALSE	FALSE	TRUE	FALSE	TRUE	FALSE	TRUE	FALSE	TRUE	FALSE	FALSE	FALSE	Cisti ??	FALSE	FALSE	FALSE	FALSE	FALSE	FALSE	TRUE	TRUE	FALSE	FALSE
32	10	F	1999	FALSE	FALSE	FALSE	FALSE	FALSE	FALSE	FALSE	FALSE	FALSE	FALSE	FALSE	FALSE	FALSE		TRUE	FALSE	FALSE	FALSE	FALSE	FALSE	FALSE	FALSE	FALSE	FALSE
33	13	M	1999	FALSE	FALSE	FALSE	FALSE	FALSE	FALSE	FALSE	FALSE	FALSE	FALSE	FALSE	FALSE	FALSE		FALSE	FALSE	FALSE	FALSE	FALSE	FALSE	TRUE	FALSE	FALSE	FALSE
34	12	M	1999	FALSE	FALSE	FALSE	FALSE	FALSE	FALSE	FALSE	FALSE	FALSE	FALSE	FALSE	FALSE	FALSE		FALSE	FALSE	FALSE	FALSE	FALSE	FALSE	FALSE	TRUE	FALSE	FALSE
35	11	M	1999	FALSE	FALSE	FALSE	TRUE	TRUE	TRUE	FALSE	FALSE	FALSE	FALSE	FALSE	FALSE	FALSE	C. E. harmanni ??	FALSE	FALSE	FALSE	FALSE	FALSE	FALSE	FALSE	TRUE	FALSE	FALSE
36	10	F	1999	FALSE	FALSE	FALSE	TRUE	FALSE	FALSE	FALSE	TRUE	FALSE	FALSE	FALSE	TRUE	FALSE	C. mononucleate indiagnosticabili	FALSE	FALSE	TRUE	FALSE	FALSE	FALSE	FALSE	FALSE	FALSE	FALSE
37	12	F	1999	FALSE	FALSE	FALSE	TRUE	FALSE	TRUE	FALSE	TRUE	FALSE	TRUE	FALSE	FALSE	FALSE	Cisti ??	TRUE	FALSE	FALSE	FALSE	FALSE	FALSE	FALSE	FALSE	FALSE	FALSE
38	16	M	1999	FALSE	FALSE	FALSE	TRUE	FALSE	FALSE	FALSE	TRUE	FALSE	FALSE	FALSE	FALSE	FALSE		FALSE	FALSE	FALSE	FALSE	FALSE	FALSE	TRUE	TRUE	TRUE	FALSE
39	10	F	1999	FALSE	FALSE	FALSE	TRUE	FALSE	FALSE	FALSE	FALSE	FALSE	TRUE	FALSE	FALSE	FALSE		FALSE	FALSE	FALSE	FALSE	FALSE	FALSE	TRUE	TRUE	FALSE	FALSE
40	13	F	1999	FALSE	FALSE	FALSE	TRUE	FALSE	TRUE	FALSE	TRUE	FALSE	FALSE	FALSE	FALSE	FALSE		FALSE	FALSE	FALSE	FALSE	FALSE	FALSE	TRUE	TRUE	FALSE	FALSE
41	12	F	1999	FALSE	FALSE	FALSE	FALSE	FALSE	FALSE	FALSE	FALSE	FALSE	FALSE	FALSE	FALSE	FALSE		TRUE	FALSE	FALSE	FALSE	FALSE	FALSE	FALSE	TRUE	FALSE	TRUE
42	11	M	1999	FALSE	FALSE	TRUE	TRUE	FALSE	FALSE	FALSE	FALSE	FALSE	FALSE	FALSE	FALSE	FALSE		TRUE	FALSE	FALSE	FALSE	FALSE	FALSE	TRUE	TRUE	FALSE	FALSE
43	13	M	1999	FALSE	FALSE	FALSE	TRUE	FALSE	FALSE	FALSE	FALSE	FALSE	FALSE	FALSE	FALSE	FALSE	C. E. hartmanni ??	FALSE	FALSE	FALSE	FALSE	FALSE	FALSE	TRUE	TRUE	TRUE	TRUE
44	9	M	1999	FALSE	FALSE	FALSE	TRUE	FALSE	FALSE	FALSE	TRUE	FALSE	FALSE	FALSE	FALSE	FALSE	C. alterate comp. E. hatmanni	FALSE	FALSE	FALSE	FALSE	FALSE	FALSE	FALSE	FALSE	FALSE	FALSE
45	10	F	1999	FALSE	FALSE	FALSE	TRUE	FALSE	FALSE	FALSE	FALSE	FALSE	FALSE	FALSE	FALSE	FALSE		FALSE	FALSE	FALSE	FALSE	FALSE	FALSE	FALSE	TRUE	FALSE	FALSE
46	10	F	1999	FALSE	FALSE	FALSE	FALSE	FALSE	FALSE	FALSE	TRUE	FALSE	FALSE	FALSE	FALSE	FALSE		FALSE	FALSE	FALSE	FALSE	FALSE	FALSE	FALSE	FALSE	FALSE	FALSE
47	12	M	1999	FALSE	FALSE	FALSE	FALSE	FALSE	FALSE	FALSE	FALSE	FALSE	FALSE	FALSE	FALSE	FALSE		FALSE	FALSE	FALSE	FALSE	FALSE	FALSE	TRUE	TRUE	FALSE	FALSE
48	8	M	1999	FALSE	FALSE	FALSE	TRUE	TRUE	TRUE	FALSE	TRUE	FALSE	TRUE	FALSE	FALSE	FALSE		FALSE	FALSE	TRUE	FALSE	FALSE	FALSE	TRUE	FALSE	FALSE	FALSE
49	9	M	1999	FALSE	FALSE	FALSE	FALSE	FALSE	FALSE	FALSE	FALSE	FALSE	FALSE	FALSE	FALSE	FALSE		TRUE	FALSE	FALSE	FALSE	FALSE	FALSE	TRUE	TRUE	TRUE	FALSE
50	10	F	1999	TRUE	FALSE	FALSE	TRUE	FALSE	TRUE	FALSE	TRUE	FALSE	TRUE	FALSE	FALSE	FALSE	T. vulpis	TRUE	FALSE	FALSE	FALSE	FALSE	FALSE	TRUE	TRUE	FALSE	TRUE
51	10	M	1999	FALSE	FALSE	FALSE	FALSE	FALSE	FALSE	FALSE	FALSE	FALSE	FALSE	FALSE	FALSE	FALSE	H. nana	FALSE	FALSE	FALSE	FALSE	FALSE	FALSE	FALSE	TRUE	FALSE	FALSE
52	11	F	1999	TRUE	FALSE	FALSE	TRUE	FALSE	FALSE	FALSE	FALSE	FALSE	FALSE	FALSE	TRUE	FALSE	B. hominis	FALSE	FALSE	FALSE	FALSE	FALSE	FALSE	TRUE	TRUE	FALSE	FALSE
53	14	F	1999	TRUE	FALSE	FALSE	TRUE	TRUE	FALSE	FALSE	FALSE	FALSE	FALSE	FALSE	FALSE	FALSE		FALSE	FALSE	FALSE	FALSE	FALSE	FALSE	TRUE	TRUE	FALSE	TRUE
54	7	M	1999	FALSE	FALSE	FALSE	FALSE	TRUE	FALSE	FALSE	FALSE	FALSE	FALSE	FALSE	FALSE	FALSE	Non estratto	FALSE	FALSE	FALSE	FALSE	FALSE	FALSE	TRUE	TRUE	FALSE	FALSE
55	9	F	1999	FALSE	FALSE	FALSE	TRUE	FALSE	TRUE	FALSE	TRUE	FALSE	FALSE	FALSE	FALSE	FALSE	B. hominis	FALSE	FALSE	FALSE	FALSE	FALSE	FALSE	TRUE	TRUE	TRUE	FALSE
56	13	M	1999	FALSE	FALSE	FALSE	FALSE	FALSE	FALSE	FALSE	FALSE	FALSE	FALSE	FALSE	FALSE	FALSE	B. hominis	FALSE	FALSE	FALSE	FALSE	FALSE	FALSE	TRUE	FALSE	FALSE	FALSE
57	13	F	1999	FALSE	FALSE	FALSE	TRUE	TRUE	FALSE	FALSE	TRUE	FALSE	FALSE	FALSE	FALSE	FALSE	B. hominis	FALSE	FALSE	FALSE	FALSE	FALSE	FALSE	TRUE	FALSE	FALSE	FALSE
58	12	F	1999	FALSE	FALSE	FALSE	TRUE	TRUE	TRUE	FALSE	FALSE	FALSE	TRUE	FALSE	FALSE	FALSE		FALSE	FALSE	FALSE	FALSE	FALSE	FALSE	TRUE	FALSE	FALSE	FALSE
59	12	M	1999	FALSE	FALSE	FALSE	TRUE	FALSE	TRUE	FALSE	FALSE	FALSE	FALSE	FALSE	FALSE	FALSE		FALSE	FALSE	FALSE	FALSE	FALSE	FALSE	TRUE	FALSE	FALSE	FALSE
60	10	F	1999	FALSE	FALSE	FALSE	TRUE	FALSE	TRUE	FALSE	FALSE	FALSE	TRUE	FALSE	FALSE	FALSE	B. hominis	FALSE	FALSE	FALSE	FALSE	FALSE	FALSE	FALSE	FALSE	FALSE	FALSE
61	14	F	1999	FALSE	FALSE	FALSE	TRUE	TRUE	FALSE	FALSE	FALSE	FALSE	FALSE	FALSE	FALSE	FALSE	E. Poleki ??	TRUE	TRUE	FALSE	FALSE	FALSE	FALSE	TRUE	TRUE	FALSE	FALSE
62	10	F	1999	FALSE	FALSE	FALSE	FALSE	FALSE	FALSE	FALSE	FALSE	FALSE	FALSE	FALSE	FALSE	FALSE	Criptos. ??	FALSE	FALSE	FALSE	FALSE	FALSE	FALSE	FALSE	FALSE	FALSE	FALSE
63	8	M	1999	FALSE	FALSE	FALSE	TRUE	FALSE	FALSE	FALSE	TRUE	FALSE	FALSE	FALSE	FALSE	FALSE	B. hominis	FALSE	FALSE	TRUE	FALSE	FALSE	FALSE	TRUE	TRUE	FALSE	FALSE
64	13	F	1999	FALSE	FALSE	FALSE	FALSE	FALSE	FALSE	FALSE	FALSE	FALSE	FALSE	FALSE	FALSE	FALSE	C. indiagnosticabili	FALSE	FALSE	FALSE	FALSE	FALSE	FALSE	FALSE	TRUE	FALSE	FALSE
65	10	M	1999	FALSE	FALSE	FALSE	FALSE	FALSE	FALSE	FALSE	FALSE	FALSE	FALSE	FALSE	FALSE	FALSE		FALSE	FALSE	FALSE	FALSE	FALSE	FALSE	TRUE	TRUE	TRUE	FALSE
66	9	M	1999	FALSE	FALSE	FALSE	FALSE	TRUE	TRUE	FALSE	FALSE	FALSE	FALSE	FALSE	FALSE	FALSE	B. hominis	TRUE	FALSE	FALSE	FALSE	FALSE	FALSE	FALSE	FALSE	FALSE	FALSE
67	15	M	1999	FALSE	FALSE	FALSE	FALSE	FALSE	FALSE	FALSE	FALSE	FALSE	FALSE	FALSE	FALSE	FALSE		FALSE	FALSE	FALSE	FALSE	FALSE	FALSE	FALSE	TRUE	TRUE	FALSE
68	10	F	1999	FALSE	FALSE	FALSE	FALSE	FALSE	FALSE	FALSE	FALSE	FALSE	FALSE	FALSE	FALSE	FALSE		FALSE	FALSE	FALSE	FALSE	FALSE	FALSE	TRUE	TRUE	TRUE	FALSE
69	12	F	1999	FALSE	FALSE	FALSE	TRUE	FALSE	FALSE	FALSE	FALSE	FALSE	FALSE	FALSE	TRUE	FALSE		FALSE	FALSE	FALSE	FALSE	FALSE	FALSE	TRUE	TRUE	TRUE	FALSE
70	17	S	1999	FALSE	FALSE	FALSE	FALSE	FALSE	TRUE	FALSE	TRUE	FALSE	FALSE	FALSE	FALSE	FALSE		FALSE	FALSE	FALSE	FALSE	FALSE	FALSE	TRUE	FALSE	FALSE	FALSE
70	14	F	1999	FALSE	FALSE	FALSE	FALSE	FALSE	FALSE	FALSE	TRUE	FALSE	FALSE	FALSE	FALSE	FALSE		TRUE	FALSE	FALSE	FALSE	FALSE	FALSE	FALSE	FALSE	FALSE	FALSE
71	14	F	1999	FALSE	FALSE	FALSE	TRUE	FALSE	FALSE	FALSE	FALSE	FALSE	FALSE	FALSE	FALSE	FALSE		FALSE	FALSE	FALSE	FALSE	FALSE	FALSE	TRUE	TRUE	TRUE	TRUE
72	12	M	1999	FALSE	FALSE	FALSE	FALSE	FALSE	FALSE	FALSE	TRUE	FALSE	FALSE	FALSE	FALSE	FALSE		FALSE	FALSE	FALSE	FALSE	FALSE	FALSE	TRUE	TRUE	TRUE	FALSE
73	10	M	1999	TRUE	FALSE	FALSE	TRUE	TRUE	FALSE	FALSE	FALSE	FALSE	TRUE	TRUE	FALSE	FALSE		FALSE	FALSE	FALSE	FALSE	FALSE	FALSE	TRUE	TRUE	TRUE	FALSE
74	8	F	1999	FALSE	FALSE	FALSE	FALSE	FALSE	FALSE	FALSE	FALSE	FALSE	FALSE	FALSE	FALSE	FALSE		FALSE	FALSE	FALSE	FALSE	FALSE	FALSE	TRUE	TRUE	FALSE	FALSE
75	16	M	1999	FALSE	FALSE	FALSE	TRUE	TRUE	TRUE	FALSE	TRUE	FALSE	TRUE	FALSE	FALSE	FALSE	Trof. flagellato ?	FALSE	FALSE	TRUE	FALSE	FALSE	FALSE	TRUE	TRUE	FALSE	FALSE
76	12	M	1999	FALSE	FALSE	FALSE	TRUE	FALSE	FALSE	FALSE	FALSE	FALSE	FALSE	FALSE	FALSE	FALSE		FALSE	FALSE	TRUE	FALSE	FALSE	FALSE	FALSE	TRUE	FALSE	TRUE
77	12	F	1999	TRUE	FALSE	FALSE	TRUE	FALSE	TRUE	FALSE	TRUE	FALSE	FALSE	FALSE	FALSE	FALSE		FALSE	FALSE	TRUE	FALSE	FALSE	FALSE	FALSE	FALSE	FALSE	FALSE
78	17	S	1999	FALSE	FALSE	FALSE	FALSE	FALSE	FALSE	FALSE	FALSE	FALSE	FALSE	FALSE	FALSE	FALSE		FALSE	FALSE	FALSE	FALSE	FALSE	FALSE	FALSE	TRUE	FALSE	FALSE
78	9	M	1999	FALSE	FALSE	TRUE	TRUE	TRUE	FALSE	FALSE	TRUE	FALSE	FALSE	FALSE	FALSE	FALSE		FALSE	FALSE	FALSE	FALSE	FALSE	FALSE	FALSE	FALSE	FALSE	FALSE
79	15	S	1999	FALSE	FALSE	FALSE	FALSE	FALSE	FALSE	FALSE	FALSE	FALSE	FALSE	FALSE	FALSE	FALSE		FALSE	FALSE	FALSE	FALSE	FALSE	FALSE	FALSE	TRUE	FALSE	TRUE
79	11	F	1999	FALSE	FALSE	FALSE	TRUE	FALSE	TRUE	FALSE	TRUE	FALSE	FALSE	FALSE	FALSE	FALSE		FALSE	FALSE	TRUE	FALSE	FALSE	FALSE	FALSE	FALSE	FALSE	FALSE
80	16	S	1999	FALSE	FALSE	FALSE	TRUE	FALSE	FALSE	FALSE	FALSE	FALSE	FALSE	FALSE	FALSE	FALSE		FALSE	FALSE	FALSE	FALSE	FALSE	FALSE	FALSE	FALSE	FALSE	FALSE
80	10	M	1999	FALSE	FALSE	TRUE	TRUE	FALSE	TRUE	FALSE	FALSE	FALSE	TRUE	FALSE	TRUE	FALSE	T. vulpis	FALSE	FALSE	TRUE	FALSE	FALSE	FALSE	TRUE	TRUE	FALSE	FALSE
81	0	S	1999	FALSE	FALSE	FALSE	TRUE	FALSE	FALSE	FALSE	FALSE	FALSE	FALSE	FALSE	FALSE	FALSE		FALSE	FALSE	FALSE	FALSE	FALSE	FALSE	FALSE	TRUE	FALSE	TRUE
81	9	F	1999	FALSE	FALSE	FALSE	FALSE	FALSE	FALSE	FALSE	FALSE	FALSE	FALSE	FALSE	FALSE	FALSE		FALSE	FALSE	FALSE	FALSE	FALSE	FALSE	TRUE	FALSE	FALSE	FALSE
82	9	F	1999	FALSE	FALSE	FALSE	TRUE	FALSE	FALSE	FALSE	FALSE	FALSE	FALSE	FALSE	FALSE	FALSE		FALSE	FALSE	FALSE	FALSE	FALSE	FALSE	TRUE	TRUE	FALSE	TRUE
83	13	F	1999	FALSE	FALSE	FALSE	FALSE	FALSE	FALSE	FALSE	FALSE	FALSE	FALSE	FALSE	FALSE	FALSE		FALSE	FALSE	FALSE	FALSE	FALSE	FALSE	TRUE	TRUE	FALSE	FALSE
84	9	M	1999	FALSE	FALSE	FALSE	TRUE	FALSE	FALSE	FALSE	FALSE	FALSE	TRUE	FALSE	FALSE	FALSE	Cisti alterate	FALSE	FALSE	FALSE	FALSE	FALSE	FALSE	TRUE	TRUE	FALSE	TRUE
85	12	F	1999	TRUE	FALSE	FALSE	TRUE	TRUE	TRUE	FALSE	TRUE	FALSE	TRUE	FALSE	FALSE	FALSE	B. hominis	TRUE	FALSE	FALSE	FALSE	FALSE	FALSE	FALSE	FALSE	FALSE	FALSE
86	12	F	1999	FALSE	FALSE	FALSE	FALSE	FALSE	FALSE	FALSE	FALSE	FALSE	FALSE	FALSE	FALSE	FALSE		FALSE	FALSE	FALSE	FALSE	FALSE	FALSE	TRUE	TRUE	FALSE	TRUE
87	10	M	1999	FALSE	FALSE	FALSE	TRUE	FALSE	FALSE	FALSE	TRUE	FALSE	TRUE	FALSE	FALSE	FALSE		FALSE	FALSE	FALSE	FALSE	FALSE	FALSE	TRUE	TRUE	TRUE	FALSE
88	12	F	1999	FALSE	FALSE	FALSE	TRUE	FALSE	FALSE	FALSE	FALSE	FALSE	TRUE	FALSE	FALSE	FALSE	Cisti 12,82 mic.	FALSE	FALSE	FALSE	FALSE	FALSE	FALSE	TRUE	TRUE	TRUE	FALSE
89	10	F	1999	FALSE	FALSE	FALSE	FALSE	FALSE	FALSE	FALSE	FALSE	FALSE	FALSE	FALSE	FALSE	FALSE		FALSE	FALSE	FALSE	FALSE	FALSE	FALSE	FALSE	FALSE	FALSE	FALSE
90	7	F	1999	FALSE	FALSE	FALSE	FALSE	FALSE	FALSE	FALSE	FALSE	FALSE	FALSE	FALSE	FALSE	FALSE		FALSE	FALSE	FALSE	FALSE	FALSE	FALSE	TRUE	TRUE	FALSE	FALSE
91	9	F	1999	FALSE	FALSE	FALSE	TRUE	FALSE	FALSE	FALSE	FALSE	FALSE	FALSE	FALSE	FALSE	FALSE	Cisti 13 mic.	TRUE	FALSE	FALSE	FALSE	FALSE	FALSE	TRUE	TRUE	TRUE	FALSE
92	6	F	1999	FALSE	FALSE	FALSE	TRUE	FALSE	TRUE	FALSE	TRUE	TRUE	TRUE	FALSE	FALSE	FALSE	Cisti 13 mic.	FALSE	FALSE	FALSE	FALSE	FALSE	FALSE	TRUE	TRUE	FALSE	FALSE
93	7	M	1999	TRUE	FALSE	FALSE	TRUE	FALSE	TRUE	FALSE	TRUE	FALSE	TRUE	FALSE	FALSE	FALSE		FALSE	FALSE	FALSE	FALSE	FALSE	FALSE	TRUE	TRUE	TRUE	TRUE
95	6	M	1999	TRUE	TRUE	FALSE	TRUE	TRUE	TRUE	FALSE	FALSE	FALSE	FALSE	FALSE	FALSE	FALSE	Trof. flagellato Pentatricomonas ?	TRUE	TRUE	TRUE	FALSE	FALSE	FALSE	TRUE	TRUE	FALSE	FALSE
96	7	M	1999	FALSE	TRUE	FALSE	TRUE	TRUE	FALSE	FALSE	TRUE	FALSE	TRUE	FALSE	FALSE	FALSE		TRUE	TRUE	FALSE	FALSE	FALSE	FALSE	FALSE	TRUE	FALSE	FALSE
97	8	M	1999	FALSE	FALSE	FALSE	FALSE	FALSE	FALSE	FALSE	FALSE	FALSE	FALSE	FALSE	FALSE	FALSE		TRUE	FALSE	FALSE	FALSE	FALSE	FALSE	TRUE	TRUE	TRUE	FALSE
98	9	F	1999	TRUE	FALSE	FALSE	TRUE	FALSE	FALSE	FALSE	TRUE	FALSE	TRUE	FALSE	FALSE	FALSE	H. nana	FALSE	FALSE	FALSE	FALSE	FALSE	FALSE	FALSE	TRUE	FALSE	FALSE
99	12	F	1999	FALSE	FALSE	FALSE	TRUE	FALSE	FALSE	FALSE	TRUE	FALSE	TRUE	TRUE	FALSE	FALSE		FALSE	FALSE	FALSE	FALSE	FALSE	FALSE	TRUE	TRUE	TRUE	FALSE
100	13	F	1999	FALSE	FALSE	FALSE	FALSE	FALSE	TRUE	FALSE	TRUE	FALSE	TRUE	FALSE	FALSE	FALSE		FALSE	FALSE	FALSE	FALSE	FALSE	FALSE	TRUE	TRUE	FALSE	FALSE
101	6	M	1999	FALSE	FALSE	FALSE	FALSE	FALSE	FALSE	FALSE	FALSE	FALSE	FALSE	FALSE	FALSE	FALSE		FALSE	FALSE	FALSE	FALSE	FALSE	FALSE	FALSE	FALSE	FALSE	FALSE
102	7	M	1999	FALSE	FALSE	FALSE	FALSE	FALSE	TRUE	FALSE	TRUE	FALSE	FALSE	FALSE	FALSE	FALSE		FALSE	FALSE	FALSE	FALSE	FALSE	FALSE	FALSE	FALSE	FALSE	FALSE
104	13	M	1999	FALSE	FALSE	FALSE	TRUE	FALSE	FALSE	FALSE	TRUE	FALSE	FALSE	FALSE	FALSE	FALSE		FALSE	FALSE	FALSE	FALSE	FALSE	FALSE	TRUE	TRUE	FALSE	FALSE
105	13	F	1999	FALSE	FALSE	FALSE	TRUE	FALSE	TRUE	FALSE	TRUE	FALSE	FALSE	FALSE	FALSE	FALSE		FALSE	FALSE	FALSE	FALSE	FALSE	FALSE	TRUE	TRUE	FALSE	FALSE
107	7	F	1999	FALSE	FALSE	FALSE	FALSE	FALSE	FALSE	FALSE	FALSE	FALSE	FALSE	FALSE	FALSE	FALSE	Uova di Acaro	TRUE	FALSE	FALSE	FALSE	FALSE	FALSE	FALSE	FALSE	FALSE	FALSE
108	6	F	1999	TRUE	FALSE	FALSE	TRUE	TRUE	FALSE	FALSE	TRUE	FALSE	FALSE	FALSE	FALSE	FALSE	B. hominis, Trof. ??	FALSE	FALSE	TRUE	FALSE	FALSE	FALSE	FALSE	FALSE	FALSE	FALSE
109	7	F	1999	FALSE	FALSE	FALSE	TRUE	TRUE	TRUE	FALSE	FALSE	FALSE	TRUE	FALSE	FALSE	FALSE		TRUE	FALSE	FALSE	FALSE	FALSE	FALSE	FALSE	TRUE	FALSE	FALSE
110	7	F	1999	TRUE	FALSE	FALSE	TRUE	FALSE	FALSE	FALSE	TRUE	FALSE	TRUE	FALSE	FALSE	FALSE		TRUE	FALSE	FALSE	FALSE	FALSE	FALSE	FALSE	FALSE	FALSE	FALSE
111	13	M	1999	FALSE	FALSE	FALSE	FALSE	FALSE	FALSE	FALSE	FALSE	FALSE	FALSE	FALSE	FALSE	FALSE		FALSE	FALSE	FALSE	FALSE	FALSE	FALSE	TRUE	FALSE	FALSE	FALSE
113	8	F	1999	TRUE	FALSE	FALSE	TRUE	FALSE	TRUE	FALSE	TRUE	FALSE	TRUE	FALSE	FALSE	FALSE		FALSE	FALSE	TRUE	FALSE	FALSE	FALSE	FALSE	FALSE	FALSE	FALSE
114	6	M	1999	FALSE	FALSE	FALSE	FALSE	FALSE	FALSE	FALSE	FALSE	FALSE	FALSE	FALSE	FALSE	FALSE	Uova di Acaro	FALSE	FALSE	FALSE	FALSE	FALSE	FALSE	FALSE	TRUE	FALSE	TRUE
115	10	F	1999	TRUE	FALSE	FALSE	TRUE	FALSE	FALSE	FALSE	FALSE	FALSE	TRUE	FALSE	FALSE	FALSE		FALSE	FALSE	FALSE	FALSE	FALSE	FALSE	TRUE	TRUE	TRUE	TRUE
116	13	F	1999	FALSE	FALSE	FALSE	TRUE	TRUE	FALSE	FALSE	TRUE	FALSE	TRUE	FALSE	FALSE	FALSE	C 12,82 mic. T. vulpis	FALSE	FALSE	FALSE	FALSE	FALSE	FALSE	TRUE	TRUE	TRUE	TRUE
117	7	M	1999	FALSE	FALSE	FALSE	FALSE	FALSE	TRUE	FALSE	TRUE	FALSE	FALSE	FALSE	FALSE	FALSE		FALSE	FALSE	FALSE	FALSE	FALSE	FALSE	TRUE	TRUE	FALSE	FALSE
118	12	F	1999	FALSE	FALSE	FALSE	TRUE	FALSE	FALSE	FALSE	TRUE	FALSE	FALSE	FALSE	FALSE	FALSE	C. E. hartmanni ??	FALSE	FALSE	FALSE	FALSE	FALSE	FALSE	FALSE	FALSE	FALSE	FALSE
119	7	M	1999	FALSE	FALSE	FALSE	FALSE	FALSE	TRUE	FALSE	TRUE	FALSE	FALSE	FALSE	FALSE	FALSE	Uova Acaro	TRUE	FALSE	FALSE	FALSE	FALSE	FALSE	FALSE	TRUE	FALSE	FALSE
122	8	F	1999	FALSE	FALSE	FALSE	FALSE	FALSE	FALSE	FALSE	FALSE	FALSE	TRUE	FALSE	FALSE	FALSE	Uova di Acaro	FALSE	FALSE	FALSE	FALSE	FALSE	FALSE	FALSE	TRUE	FALSE	FALSE
123	6	F	1999	FALSE	FALSE	FALSE	FALSE	FALSE	FALSE	FALSE	FALSE	FALSE	FALSE	FALSE	FALSE	FALSE	T vulpis, Flagel: Chil. e/o Pentat.	FALSE	FALSE	FALSE	FALSE	FALSE	FALSE	TRUE	TRUE	FALSE	FALSE
124	12	F	1999	FALSE	FALSE	FALSE	TRUE	FALSE	TRUE	FALSE	TRUE	FALSE	FALSE	FALSE	FALSE	FALSE		FALSE	FALSE	FALSE	FALSE	FALSE	FALSE	TRUE	TRUE	FALSE	FALSE
125	6	F	1999	FALSE	FALSE	FALSE	TRUE	FALSE	FALSE	FALSE	FALSE	FALSE	FALSE	FALSE	FALSE	FALSE		TRUE	FALSE	FALSE	FALSE	FALSE	FALSE	FALSE	FALSE	FALSE	FALSE
127	6	M	1999	FALSE	FALSE	FALSE	TRUE	FALSE	TRUE	FALSE	FALSE	FALSE	FALSE	FALSE	FALSE	FALSE		TRUE	FALSE	FALSE	FALSE	FALSE	FALSE	FALSE	TRUE	FALSE	FALSE
128	8	F	1999	FALSE	FALSE	FALSE	TRUE	TRUE	FALSE	FALSE	FALSE	FALSE	FALSE	FALSE	FALSE	FALSE		TRUE	FALSE	FALSE	FALSE	FALSE	FALSE	FALSE	TRUE	FALSE	FALSE
129	9	M	1999	TRUE	FALSE	FALSE	TRUE	FALSE	FALSE	FALSE	FALSE	FALSE	FALSE	FALSE	FALSE	FALSE		TRUE	FALSE	FALSE	FALSE	FALSE	FALSE	FALSE	TRUE	FALSE	FALSE
131	8	M	1999	FALSE	FALSE	FALSE	TRUE	FALSE	FALSE	FALSE	FALSE	FALSE	FALSE	FALSE	FALSE	FALSE		FALSE	FALSE	FALSE	FALSE	FALSE	FALSE	FALSE	FALSE	FALSE	FALSE
133	6	F	1999	FALSE	FALSE	FALSE	FALSE	FALSE	FALSE	FALSE	FALSE	FALSE	TRUE	FALSE	FALSE	FALSE		FALSE	FALSE	FALSE	FALSE	FALSE	FALSE	FALSE	FALSE	FALSE	FALSE
134	10	F	1999	FALSE	FALSE	FALSE	TRUE	FALSE	TRUE	FALSE	TRUE	FALSE	TRUE	FALSE	FALSE	FALSE		FALSE	FALSE	FALSE	FALSE	FALSE	FALSE	TRUE	TRUE	FALSE	FALSE
138	7	M	1999	FALSE	FALSE	FALSE	FALSE	FALSE	FALSE	FALSE	TRUE	FALSE	FALSE	FALSE	FALSE	FALSE		FALSE	FALSE	FALSE	FALSE	FALSE	FALSE	FALSE	FALSE	FALSE	FALSE
139	6	M	1999	TRUE	FALSE	FALSE	FALSE	FALSE	TRUE	FALSE	FALSE	FALSE	FALSE	FALSE	FALSE	FALSE	C. E. coli ??	FALSE	FALSE	FALSE	FALSE	FALSE	FALSE	FALSE	FALSE	FALSE	FALSE
140	8	F	1999	FALSE	FALSE	FALSE	FALSE	TRUE	FALSE	FALSE	FALSE	FALSE	FALSE	FALSE	FALSE	FALSE	Trof. Entamoeba sp.	FALSE	FALSE	FALSE	FALSE	FALSE	FALSE	TRUE	TRUE	TRUE	FALSE
143	8	M	1999	FALSE	FALSE	FALSE	FALSE	FALSE	FALSE	FALSE	TRUE	FALSE	FALSE	FALSE	FALSE	FALSE		TRUE	TRUE	FALSE	FALSE	FALSE	FALSE	FALSE	TRUE	FALSE	TRUE
144	6	M	1999	FALSE	FALSE	FALSE	TRUE	FALSE	TRUE	FALSE	TRUE	FALSE	FALSE	FALSE	FALSE	FALSE	T. vulpis	FALSE	FALSE	FALSE	FALSE	FALSE	FALSE	FALSE	TRUE	FALSE	FALSE
145	6	F	1999	FALSE	FALSE	FALSE	TRUE	FALSE	FALSE	FALSE	FALSE	FALSE	FALSE	FALSE	FALSE	FALSE	Trof. Flagellato, T. vulpis	FALSE	FALSE	FALSE	FALSE	FALSE	FALSE	TRUE	TRUE	FALSE	FALSE
146	6	M	1999	FALSE	FALSE	FALSE	FALSE	FALSE	FALSE	FALSE	FALSE	FALSE	FALSE	FALSE	FALSE	FALSE	B. hominis	FALSE	FALSE	FALSE	FALSE	FALSE	FALSE	FALSE	FALSE	FALSE	FALSE
147	13	M	1999	FALSE	FALSE	FALSE	TRUE	FALSE	TRUE	FALSE	FALSE	FALSE	TRUE	FALSE	FALSE	FALSE		TRUE	FALSE	FALSE	FALSE	FALSE	FALSE	TRUE	TRUE	TRUE	FALSE
148	12	F	1999	FALSE	FALSE	FALSE	FALSE	FALSE	FALSE	FALSE	FALSE	FALSE	FALSE	FALSE	FALSE	FALSE	C./T. B. coli, T. vulpis	FALSE	FALSE	FALSE	FALSE	FALSE	FALSE	TRUE	TRUE	FALSE	FALSE
149	14	F	1999	FALSE	FALSE	FALSE	TRUE	FALSE	FALSE	FALSE	FALSE	FALSE	FALSE	FALSE	FALSE	FALSE		FALSE	FALSE	FALSE	FALSE	FALSE	FALSE	FALSE	TRUE	FALSE	FALSE
150	11	F	1999	FALSE	FALSE	FALSE	FALSE	FALSE	FALSE	FALSE	TRUE	FALSE	TRUE	FALSE	FALSE	FALSE	C. 12 mic.	TRUE	FALSE	FALSE	FALSE	FALSE	FALSE	TRUE	TRUE	FALSE	FALSE
151	6	M	1999	FALSE	FALSE	FALSE	FALSE	FALSE	TRUE	FALSE	FALSE	FALSE	TRUE	FALSE	FALSE	FALSE		FALSE	FALSE	FALSE	FALSE	FALSE	FALSE	TRUE	TRUE	FALSE	FALSE
152	7	M	1999	FALSE	FALSE	FALSE	TRUE	TRUE	TRUE	FALSE	TRUE	FALSE	FALSE	FALSE	FALSE	FALSE		FALSE	FALSE	FALSE	FALSE	FALSE	FALSE	FALSE	TRUE	FALSE	TRUE
153	10	M	1999	FALSE	FALSE	FALSE	TRUE	TRUE	FALSE	FALSE	FALSE	FALSE	FALSE	FALSE	FALSE	FALSE		TRUE	FALSE	FALSE	FALSE	FALSE	FALSE	FALSE	TRUE	FALSE	FALSE
155	16	F	1999	FALSE	FALSE	FALSE	TRUE	FALSE	TRUE	FALSE	TRUE	FALSE	TRUE	FALSE	FALSE	FALSE		FALSE	FALSE	TRUE	FALSE	FALSE	FALSE	FALSE	TRUE	FALSE	FALSE
157	9	M	1999	FALSE	FALSE	FALSE	TRUE	TRUE	FALSE	FALSE	TRUE	FALSE	FALSE	FALSE	FALSE	FALSE	Trof. Flagellato	FALSE	FALSE	FALSE	FALSE	FALSE	FALSE	FALSE	TRUE	FALSE	FALSE
158	10	M	1999	FALSE	FALSE	FALSE	FALSE	FALSE	FALSE	FALSE	FALSE	FALSE	FALSE	FALSE	FALSE	FALSE	Trof. Entamoeba sp.	TRUE	FALSE	FALSE	FALSE	FALSE	FALSE	FALSE	TRUE	FALSE	FALSE
159	6	F	1999	FALSE	FALSE	FALSE	FALSE	FALSE	FALSE	FALSE	TRUE	FALSE	TRUE	FALSE	FALSE	FALSE		FALSE	FALSE	FALSE	FALSE	FALSE	FALSE	FALSE	FALSE	FALSE	FALSE
160	6	F	1999	FALSE	FALSE	FALSE	FALSE	FALSE	FALSE	FALSE	FALSE	FALSE	FALSE	FALSE	FALSE	FALSE		FALSE	FALSE	FALSE	FALSE	FALSE	FALSE	FALSE	FALSE	FALSE	FALSE
162	10	F	1999	FALSE	FALSE	FALSE	TRUE	FALSE	FALSE	FALSE	FALSE	FALSE	FALSE	FALSE	FALSE	FALSE	C 13 mic.	TRUE	FALSE	FALSE	FALSE	FALSE	FALSE	FALSE	TRUE	FALSE	TRUE
164	8	M	1999	FALSE	FALSE	FALSE	FALSE	FALSE	FALSE	FALSE	TRUE	FALSE	FALSE	FALSE	FALSE	FALSE	T. vulpis	TRUE	FALSE	TRUE	FALSE	FALSE	FALSE	FALSE	TRUE	FALSE	FALSE
165	8	F	1999	FALSE	FALSE	FALSE	FALSE	FALSE	FALSE	FALSE	FALSE	FALSE	FALSE	FALSE	FALSE	FALSE		FALSE	FALSE	FALSE	FALSE	FALSE	FALSE	FALSE	FALSE	FALSE	FALSE
166	8	F	1999	FALSE	FALSE	FALSE	TRUE	FALSE	FALSE	FALSE	FALSE	FALSE	FALSE	FALSE	FALSE	FALSE	C. 12,82 mic.	FALSE	FALSE	FALSE	FALSE	FALSE	FALSE	FALSE	FALSE	FALSE	FALSE
168	8	M	1999	FALSE	FALSE	FALSE	FALSE	FALSE	FALSE	FALSE	FALSE	FALSE	FALSE	FALSE	FALSE	FALSE		FALSE	FALSE	FALSE	FALSE	FALSE	FALSE	FALSE	FALSE	FALSE	FALSE
172	6	F	1999	TRUE	FALSE	FALSE	FALSE	FALSE	TRUE	FALSE	FALSE	FALSE	FALSE	FALSE	FALSE	FALSE	T. vulpis	FALSE	FALSE	FALSE	FALSE	FALSE	FALSE	FALSE	TRUE	FALSE	FALSE
173	8	F	1999	FALSE	FALSE	FALSE	TRUE	TRUE	TRUE	FALSE	FALSE	FALSE	FALSE	FALSE	FALSE	FALSE		FALSE	FALSE	FALSE	FALSE	FALSE	FALSE	TRUE	TRUE	FALSE	TRUE
174	7	F	1999	TRUE	FALSE	FALSE	TRUE	FALSE	FALSE	FALSE	TRUE	FALSE	TRUE	FALSE	FALSE	FALSE		TRUE	FALSE	FALSE	FALSE	FALSE	FALSE	FALSE	TRUE	FALSE	FALSE
175	10	M	1999	FALSE	FALSE	FALSE	TRUE	FALSE	FALSE	FALSE	TRUE	FALSE	FALSE	FALSE	FALSE	FALSE	C. 12,82 mic.	TRUE	TRUE	FALSE	FALSE	FALSE	FALSE	FALSE	TRUE	FALSE	FALSE
176	12	M	1999	FALSE	FALSE	FALSE	FALSE	FALSE	FALSE	FALSE	FALSE	FALSE	FALSE	FALSE	FALSE	FALSE		FALSE	FALSE	FALSE	FALSE	FALSE	FALSE	FALSE	TRUE	FALSE	FALSE
178	6	M	1999	FALSE	FALSE	FALSE	FALSE	FALSE	FALSE	FALSE	FALSE	FALSE	FALSE	FALSE	FALSE	FALSE		TRUE	FALSE	FALSE	FALSE	FALSE	FALSE	FALSE	FALSE	FALSE	FALSE

## Sheet: 1999_Oncho
IDContator		Anno	Eta	AgeGroup	Genere	EMDNHnana	EMDNHdimin	EMDNAltro	EMDNCGlamb	EMDNTGlamb	EMDNCCmesn	EMDNTCmesn	EMDNIbelli	EMDNShomin	EMDNAlumbr	EMDNTtrich	EMDNAncilo	EMDNSsterc	EMDNCapill	EMDNEvermi	EMDNCBcoli	EMDNTBcoli	EMCNCEhist	EMCNTEhist	EMCNCalter	EMCNCEcoli	EMCNTEcoli	EMCNCEnana	EMCNTEnana	EMCNCIbuts	EMCNTIbuts	EMCNCEhart	EMCNTEhart	EMCNHnana	EMCNHdimin	EMCNAltro	EMCNCGlamb	EMCNTGlamb	EMCNCCmesn	EMCNTCmesn	EMCNIbelli	EMCNShomin	EMCNAlumbr	EMCNTtrich	EMCNAncilo	EMCNSsterc	EMCNCapill	EMCNEvermi	EMCNCBcoli
426		1999	11	Bambino	M	1	1		1	1	1	1	1	1	1	1	1	1	1	1	1	1	5	1	1	2	1	2	1	4	1	2	1	1	1		1	1	1	1	1	1	1	1	1	1	1	1	1
427		1999	6	Bambino	M	1	1		1	1	1	1	1	1	1	1	1	1	1	1	1	1	1	1	1	5	4	4	1	4	1	1	1	1	1		1	1	1	1	1	1	1	1	1	1	1	1	1
428		1999	6	Bambino	M	1	1		1	1	1	1	1	1	1	1	1	1	1	1	1	1	1	1	1	1	1	1	1	1	1	1	1	1	1		1	1	1	1	1	1	1	1	1	1	1	1	1
429		1999	13	Bambino	M	1	1		1	1	1	1	1	1	1	1	1	1	1	1	1	1	1	1	1	1	1	1	1	1	1	1	1	1	1		1	1	1	1	1	1	1	1	1	1	1	1	1
432		1999	7	Bambino	M	1	1		1	1	1	1	1	1	1	1	1	1	1	1	1	1	1	1	1	1	1	1	1	1	1	1	1	1	1		1	1	1	1	1	1	1	1	1	1	1	1	1
433		1999	9	Bambino	F	1	1		1	1	1	1	1	1	1	1	1	1	1	1	1	1	1	1	1	1	1	1	1	1	1	1	1	1	1		1	1	1	1	1	1	1	1	1	1	1	1	1
434		1999	5	Bambino	F	1	1		1	1	1	1	1	1	1	1	1	1	1	1	1	1	1	1	1	1	1	1	1	1	1	1	1	1	1		1	1	1	1	1	1	1	1	1	1	1	1	1
435		1999	15	Bambino	M	1	1		1	1	1	1	1	1	1	1	1	1	1	1	1	1	5	1	1	1	1	2	1	1	1	4	1	1	1		1	1	1	1	1	1	1	1	3	1	1	1	1
436		1999	16	Bambino	M	1	1		1	1	1	1	1	1	1	1	1	1	1	1	1	1	1	1	1	1	1	1	1	1	1	1	1	1	1		1	1	1	1	1	1	1	1	1	1	1	1	1
437		1999	9	Bambino	F	1	1		1	1	1	1	1	1	1	1	1	1	1	1	1	1	1	1	4	4	1	1	1	5	1	4	1	1	1		1	1	1	1	1	1	6	4	1	1	1	1	1
438		1999	9	Bambino	M	1	1		1	1	1	1	1	1	1	1	1	1	1	1	1	1	1	1	1	1	1	1	1	1	1	1	1	1	1		1	1	1	1	1	1	1	1	1	1	1	1	1
439		1999	7	Bambino	M	1	1		1	1	1	1	1	1	1	1	1	1	1	1	1	1	4	1	1	2	1	5	1	4	1	4	1	1	1		5	1	1	1	1	1	4	1	1	1	1	1	1
440		1999	10	Bambino	F	1	1		1	1	1	1	1	1	1	1	1	1	1	1	1	1	1	1	1	1	1	1	1	1	1	1	1	1	1		1	1	1	1	1	1	1	1	1	1	1	1	1
441		1999	9	Bambino	M	1	1		1	1	1	1	1	1	1	1	1	1	1	1	1	1	1	1	1	1	1	1	1	1	1	1	1	1	1		1	1	1	1	1	1	2	1	4	1	1	1	1
442		1999	4	Bambino	F	1	1		1	1	1	1	1	1	1	1	1	1	1	1	1	1	4	1	1	5	5	1	1	1	1	1	1	1	1		1	1	1	1	1	1	5	1	1	1	1	1	1
443		1999	6	Bambino	F	1	1		1	1	1	1	1	1	1	1	1	1	1	1	1	1	1	1	1	1	1	3	1	3	1	1	1	1	1		1	1	1	1	1	1	5	4	4	1	4	1	1
444		1999	6	Bambino	F	1	1		1	1	1	1	1	1	1	1	1	1	1	1	1	1	1	1	1	1	1	1	1	1	1	1	1	1	1		1	1	1	1	1	1	1	1	1	1	1	1	1
445		1999	6	Bambino	F	1	1		1	1	1	1	1	1	1	1	1	1	1	1	1	1	1	1	1	1	1	1	1	1	1	1	1	1	1		1	1	1	1	1	1	1	1	1	1	1	1	1
446		1999	12	Bambino	M	1	1		1	1	1	1	1	1	1	1	1	1	1	1	1	1	1	1	1	1	1	1	1	1	1	1	1	1	1	Manca campione	1	1	1	1	1	1	1	1	1	1	1	1	1
447		1999	10	Bambino	M	1	1		1	1	1	1	1	1	1	1	1	1	1	1	1	1	1	1	1	3	1	1	1	1	1	1	1	1	4		1	1	1	1	1	1	1	2	1	1	1	1	1
448		1999	8	Bambino	F	1	1		1	1	1	1	1	1	1	1	1	1	1	1	1	1	1	1	1	3	1	1	1	4	1	1	1	1	1		1	1	1	1	1	1	2	1	1	1	1	1	1
449		1999	6	Bambino	M	1	1		1	1	1	1	1	1	1	1	1	1	1	1	1	1	1	1	1	1	1	1	1	1	1	1	1	1	1		1	1	1	1	1	1	1	1	1	1	1	1	1
450		1999	7	Bambino	F	1	1		1	1	1	1	1	1	1	1	1	1	1	1	1	1	4	1	1	1	1	4	1	5	1	4	1	1	1		1	1	1	1	1	1	3	1	3	1	1	1	1
451		1999	12	Bambino	F	1	1		1	1	1	1	1	1	1	1	1	1	1	1	1	1	1	1	1	1	1	1	1	1	1	1	1	1	1		1	1	1	1	1	1	1	1	1	1	1	3	1
452		1999	10	Bambino	M	1	1		1	1	1	1	1	1	1	1	1	1	1	1	1	1	1	1	1	1	1	1	1	1	1	1	1	1	1		1	1	1	1	1	1	1	1	1	1	1	1	1
453		1999	7	Bambino	F	1	1		1	1	1	1	1	1	1	1	1	1	1	1	1	1	1	1	1	1	1	1	1	1	1	1	1	1	1		1	1	1	1	1	1	5	4	4	1	1	1	1
454		1999	7	Bambino	F	1	1		1	1	1	1	1	1	1	1	1	1	1	1	1	1	1	1	1	1	1	1	1	1	1	1	1	1	1		1	1	1	1	1	1	5	4	4	1	1	1	1
455		1999	6	Bambino	F	1	1		1	1	1	1	1	1	1	1	1	1	1	1	1	1	1	1	1	1	1	1	1	1	1	1	1	1	1		1	1	1	1	1	1	5	4	4	1	1	1	1
456		1999	6	Bambino	F	1	1		1	1	1	1	1	1	1	1	1	1	1	1	1	1	1	1	1	1	1	1	1	1	1	1	1	1	1		1	1	1	1	1	1	1	1	1	1	1	1	1
457		1999	13	Bambino	M	1	1		1	1	1	1	1	1	1	1	1	1	1	1	1	1	5	1	1	4	1	2	1	2	1	4	1	1	1		1	1	1	1	1	1	6	4	3	1	1	1	1
458		1999	10	Bambino	M	1	1		1	1	1	1	1	1	1	1	1	1	1	1	1	1	1	1	1	4	2	3	1	5	1	1	1	1	1		1	1	1	1	1	1	5	2	2	1	1	1	1
459		1999	8	Bambino	M	1	1		1	1	1	1	1	1	1	1	1	1	1	1	1	1	1	1	1	2	4	1	1	1	1	1	1	1	1		1	1	1	1	1	1	4	2	2	1	1	1	1
460		1999	14	Bambino	M	1	1		1	1	1	1	1	1	1	1	1	1	1	1	1	1	4	1	1	4	1	1	1	4	1	1	1	1	1		1	1	1	1	1	1	6	4	5	1	1	1	1
461		1999	9	Bambino	M	1	1		1	1	1	1	1	1	1	1	1	1	1	1	1	1	1	1	1	1	1	1	1	1	1	1	1	1	1		1	1	1	1	1	1	1	1	1	1	1	1	1
462		1999	8	Bambino	M	1	1		1	1	1	1	1	1	1	1	1	1	1	1	1	1	1	1	1	5	5	1	1	1	1	1	1	1	1		1	1	1	1	1	1	6	4	4	1	1	1	1
463		1999	14	Bambino	M	1	1		1	1	1	1	1	1	1	1	1	1	1	1	1	1	1	1	1	1	1	1	1	1	1	1	1	1	1		1	1	1	1	1	1	5	4	2	1	1	1	1
464		1999	11	Bambino	M	1	1		1	1	1	1	1	1	1	1	1	1	1	1	1	1	1	1	1	1	1	1	1	1	1	1	1	1	1		1	1	1	1	1	1	5	4	3	1	1	1	1
465		1999	11	Bambino	M	1	1		1	1	1	1	1	1	1	1	1	1	1	1	1	1	1	1	1	1	1	1	1	1	1	1	1	1	1		1	1	1	1	1	1	1	1	1	1	1	1	1
466		1999	9	Bambino	M	1	1		1	1	1	1	1	1	1	1	1	1	1	1	1	1	1	1	1	5	3	1	1	1	1	1	1	1	1		1	1	1	1	1	1	6	4	2	1	1	1	1
467		1999	9	Bambino	M	1	1		1	1	1	1	1	1	1	1	1	1	1	1	1	1	1	1	1	1	1	1	1	1	1	1	1	1	1		1	1	1	1	1	1	6	4	4	1	1	1	1
468		1999	6	Bambino	F	1	1		1	1	1	1	1	1	1	1	1	1	1	1	1	1	1	1	1	1	1	1	1	1	1	1	1	1	1		1	1	1	1	1	1	6	4	3	1	1	1	1
469		1999	12	Bambino	S	1	1		1	1	1	1	1	1	1	1	1	1	1	1	1	1	1	1	1	1	1	1	1	1	1	1	1	1	1		1	1	1	1	1	1	1	1	1	1	1	1	1
470		1999	10	Bambino	M	1	1		1	1	1	1	1	1	1	1	1	1	1	1	1	1	1	1	1	1	1	1	1	1	1	1	1	1	1		1	1	1	1	1	1	3	3	1	1	1	1	1
471		1999		Bambino	M	1	1		1	1	1	1	1	1	1	1	1	1	1	1	1	1	1	1	1	1	1	1	1	1	1	1	1	1	1		1	1	1	1	1	1	4	4	4	1	1	1	1
472		1999	6	Bambino	F	1	1		1	1	1	1	1	1	1	1	1	1	1	1	1	1	1	1	1	1	1	1	1	1	1	1	1	1	1		1	1	1	1	1	1	6	4	2	1	1	1	1
473		1999		Bambino	M	1	1		1	1	1	1	1	1	1	1	1	1	1	1	1	1	1	1	1	1	1	1	1	1	1	1	1	1	1		1	1	1	1	1	1	2	4	4	1	1	1	1
474		1999	9	Bambino	M	1	1		1	1	1	1	1	1	1	1	1	1	1	1	1	1	1	1	1	6	4	4	1	1	1	1	1	1	1	N.E.	1	1	1	1	1	1	5	2	2	1	1	1	1
475		1999	11	Bambino	F	1	1		1	1	1	1	1	1	1	1	1	1	1	1	1	1	1	1	1	1	1	1	1	1	1	1	1	1	1		1	1	1	1	1	1	5	4	1	1	1	1	1
476		1999	13	Bambino	M	1	1		1	1	1	1	1	1	1	1	1	1	1	1	1	1	1	1	1	1	1	1	1	1	1	1	1	1	1		1	1	1	1	1	1	1	1	1	1	1	1	1
477		1999	9	Bambino	F	1	1		1	1	1	1	1	1	1	1	1	1	1	1	1	1	1	1	1	1	1	1	1	1	1	1	1	1	1		1	1	1	1	1	1	5	2	2	1	1	1	1
478		1999	7	Bambino	M	1	1		1	1	1	1	1	1	1	1	1	1	1	1	1	1	1	1	1	1	1	1	1	1	1	1	1	1	1		1	1	1	1	1	1	1	1	1	1	1	1	1
479		1999	10	Bambino	F	1	1		1	1	1	1	1	1	1	1	1	1	1	1	1	1	1	1	1	1	1	1	1	1	1	1	1	1	1		1	1	1	1	1	1	1	1	1	1	1	1	1
480		1999	7	Bambino	M	1	1		1	1	1	1	1	1	1	1	1	1	1	1	1	1	1	1	1	6	4	3	1	3	1	1	1	1	1		1	1	1	1	1	1	6	4	5	1	1	1	1
481		1999	9	Bambino	M	1	1		1	1	1	1	1	1	1	1	1	1	1	1	1	1	1	1	1	5	4	1	1	4	1	1	1	1	1		1	1	1	1	1	1	7	4	4	1	1	1	1
482		1999	7	Bambino	F	1	1		1	1	1	1	1	1	1	1	1	1	1	1	1	1	4	1	1	4	1	1	1	4	1	1	1	1	1		1	1	1	1	1	1	6	4	1	1	1	1	1
483		1999	10	Bambino	F	1	1		1	1	1	1	1	1	1	1	1	1	1	1	1	1	1	1	3	4	4	1	1	4	1	1	1	1	1		1	1	1	1	1	1	6	2	1	1	1	1	1
484		1999	8	Bambino	M	1	1		1	1	1	1	1	1	1	1	1	1	1	1	1	1	1	1	1	4	1	1	1	1	1	4	1	1	1		1	1	1	1	1	1	5	2	2	1	1	1	1
485		1999	11	Bambino	M	1	1		1	1	1	1	1	1	1	1	1	1	1	1	1	1	1	1	4	4	4	1	1	1	1	1	1	1	1	Tricostrogylus!!	1	1	1	1	1	1	5	1	4	1	1	1	1
486		1999	10	Bambino	M	1	1		1	1	1	1	1	1	1	1	1	1	1	1	1	1	1	1	1	1	1	1	1	1	1	1	1	1	1	Alcune cisti indiagnosticabili	1	1	1	1	1	1	5	3	1	1	1	1	1
487		1999	8	Bambino	M	1	1		1	1	1	1	1	1	1	1	1	1	1	1	1	1	1	1	1	1	1	1	1	1	1	1	1	1	1		1	1	1	1	1	1	1	1	4	1	1	1	1
488		1999	7	Bambino	M	1	1		1	1	1	1	1	1	1	1	1	1	1	1	1	1	1	1	4	4	1	1	1	2	1	1	1	1	1		1	1	4	1	1	1	6	2	3	1	1	1	1
489		1999	11	Bambino	F	1	1		1	1	1	1	1	1	1	1	1	1	1	1	1	1	1	1	1	1	1	1	1	1	1	1	1	1	1		1	1	1	1	1	1	1	1	1	1	1	1	1
490		1999	9	Bambino	F	1	1		1	1	1	1	1	1	1	1	1	1	1	1	1	1	1	1	1	1	1	1	1	1	1	1	1	1	1	Manca campione	1	1	1	1	1	1	1	1	1	1	1	1	1
491		1999	7	Bambino	M	1	1		1	1	1	1	1	1	1	1	1	1	1	1	1	1	1	1	1	1	1	1	1	1	1	1	1	1	1		1	1	1	1	1	1	1	1	1	1	1	1	1
492		1999	11	Bambino	F	1	1		1	1	1	1	1	1	1	1	1	1	1	1	1	1	1	1	1	1	4	1	1	1	1	1	1	1	1		1	1	1	4	1	1	4	4	1	1	1	1	1
493		1999	8	Bambino	F	1	1		1	1	1	1	1	1	1	1	1	1	1	1	1	1	1	1	1	4	3	2	1	4	1	1	1	1	1	Cisti 12 mic. Indiagnosticabili	1	1	1	3	1	1	5	4	1	1	1	1	1
494		1999	13	Bambino	F	1	1		1	1	1	1	1	1	1	1	1	1	1	1	1	1	1	1	1	1	1	1	1	1	1	1	1	1	1		1	1	1	1	1	1	1	1	1	1	1	1	1
495		1999	9	Bambino	M	1	1		1	1	1	1	1	1	1	1	1	1	1	1	1	1	1	1	1	1	1	1	1	1	1	1	1	1	1		1	1	1	1	1	1	1	1	1	1	1	1	1
496		1999	8	Bambino	F	1	1		1	1	1	1	1	1	1	1	1	1	1	1	1	1	1	1	1	4	1	1	1	5	1	4	1	1	1	N.E.	1	1	1	1	1	1	5	4	1	1	1	1	1
497		1999	9	Bambino	F	1	1		1	1	1	1	1	1	1	1	1	1	1	1	1	1	1	1	1	1	1	1	1	1	1	1	1	1	1		1	1	1	1	1	1	1	1	1	1	1	1	1
498		1999	6	Bambino	M	1	1		1	1	1	1	1	1	1	1	1	1	1	1	1	1	1	1	1	1	1	1	1	1	1	1	1	1	1	N.E.	1	1	1	4	1	1	6	1	1	1	1	1	1
499		1999	12	Bambino	M	1	1		1	1	1	1	1	1	1	1	1	1	1	1	1	1	1	1	1	1	1	1	1	1	1	1	1	1	1		1	1	1	1	1	1	1	1	1	1	1	1	1
500		1999	10	Bambino	M	1	1		1	1	1	1	1	1	1	1	1	1	1	1	1	1	1	1	1	1	2	5	1	1	1	1	1	1	1		1	1	1	1	1	1	5	1	5	1	1	1	1
501		1999	9	Bambino	M	1	1		1	1	1	1	1	1	1	1	1	1	1	1	1	1	5	1	1	1	1	1	1	5	1	1	1	1	1	Numerose C. E. polecki	1	1	1	1	1	1	5	1	5	1	1	1	1
502		1999	8	Bambino	F	1	1		1	1	1	1	1	1	1	1	1	1	1	1	1	1	1	1	1	5	6	5	1	6	1	1	1	1	1		1	1	1	1	1	1	5	3	5	1	1	1	1
503		1999	10	Bambino	M	1	1		1	1	1	1	1	1	1	1	1	1	1	1	1	1	1	1	1	5	5	4	1	1	1	3	1	1	1		1	1	1	3	1	1	5	2	2	1	1	1	1
504		1999	7	Bambino	F	1	1		1	1	1	1	1	1	1	1	1	1	1	1	1	1	1	1	1	6	1	1	1	1	1	1	1	1	1		1	1	1	1	1	1	6	2	1	1	1	1	1
505		1999	10	Bambino	F	1	1		1	1	1	1	1	1	1	1	1	1	1	1	1	1	1	1	4	1	1	4	1	4	1	1	1	1	1		1	1	1	1	1	1	4	1	3	1	1	1	1
506		1999	7	Bambino	F	1	1		1	1	1	1	1	1	1	1	1	1	1	1	1	1	1	1	1	1	1	1	1	1	1	1	1	1	1		1	1	1	1	1	1	1	1	1	1	1	1	1
507		1999		Bambino	S	1	1		1	1	1	1	1	1	1	1	1	1	1	1	1	1	1	1	1	1	1	1	1	1	1	1	1	1	1		1	1	1	1	1	1	4	1	1	1	1	1	1
508		1999	8	Bambino	M	1	1		1	1	1	1	1	1	1	1	1	1	1	1	1	1	1	1	1	6	1	5	1	5	1	1	1	1	1		1	1	1	1	1	1	1	4	4	1	1	1	1
509		1999	13	Bambino	M	1	1		1	1	1	1	1	1	1	1	1	1	1	1	1	1	1	1	1	6	4	1	1	1	1	1	1	1	1		1	1	1	1	1	1	1	4	3	1	1	1	1
510		1999	11	Bambino	M	1	1		1	1	1	1	1	1	1	1	1	1	1	1	1	1	1	1	1	4	1	1	1	1	1	1	1	1	1		1	1	1	1	1	1	1	2	3	1	1	1	1
511		1999	10	Bambino	M	1	1		1	1	1	1	1	1	1	1	1	1	1	1	1	1	1	1	1	6	4	2	1	1	1	1	1	1	1		1	1	2	1	1	1	4	5	1	1	1	1	1
512		1999	8	Bambino	M	1	1		1	1	1	1	1	1	1	1	1	1	1	1	1	1	1	1	1	4	4	4	1	4	1	1	1	1	1		4	1	1	1	1	1	1	4	4	1	1	1	1
513		1999	12	Bambino	M	1	1		1	1	1	1	1	1	1	1	1	1	1	1	1	1	1	1	1	1	1	4	1	1	1	1	1	1	1		1	1	1	1	1	1	5	1	2	1	1	1	1
514		1999	8	Bambino	F	1	1		1	1	1	1	1	1	1	1	1	1	1	1	1	1	1	1	1	1	1	1	1	1	1	1	1	1	1		1	1	1	1	1	1	6	2	2	1	1	1	1
515		1999	8	Bambino	M	1	1		1	1	1	1	1	1	1	1	1	1	1	1	1	1	1	1	1	4	1	1	1	4	1	1	1	1	1		1	1	1	1	1	1	5	1	5	1	1	1	1
516		1999	10	Bambino	M	1	1		1	1	1	1	1	1	1	1	1	1	1	1	1	1	1	1	4	1	1	1	1	1	1	1	1	1	1		1	1	1	1	1	1	6	3	3	1	1	1	1
517		1999		Bambino	M	1	1		1	1	1	1	1	1	1	1	1	1	1	1	1	1	1	1	1	1	1	1	1	1	1	1	1	1	1		1	1	1	1	1	1	1	1	1	1	1	1	1
518		1999	13	Bambino	M	1	1		1	1	1	1	1	1	1	1	1	1	1	1	1	1	1	1	1	3	4	1	1	1	1	1	1	1	1		1	1	1	1	1	1	5	3	3	1	1	3	1
519		1999	7	Bambino	M	1	1		1	1	1	1	1	1	1	1	1	1	1	1	1	1	1	1	1	1	1	1	1	1	1	1	1	1	1		1	1	1	1	1	1	1	3	3	1	1	1	1
520		1999	15	Bambino	M	1	1		1	1	1	1	1	1	1	1	1	1	1	1	1	1	1	1	1	4	4	1	1	1	1	1	1	1	1		1	1	1	1	1	1	5	1	2	1	1	1	1
521		1999	11	Bambino	F	1	1		1	1	1	1	1	1	1	1	1	1	1	1	1	1	1	1	1	1	1	1	1	1	1	1	1	1	1		1	1	1	1	1	1	1	1	1	1	1	1	1
522		1999	9	Bambino	F	1	1		1	1	1	1	1	1	1	1	1	1	1	1	1	1	1	1	1	4	4	4	1	1	1	4	1	1	1		1	1	1	1	1	1	6	1	4	1	1	1	1
523		1999	7	Bambino	F	1	1		1	1	1	1	1	1	1	1	1	1	1	1	1	1	2	1	1	1	1	4	1	4	1	1	1	1	1		1	1	1	1	1	1	5	1	1	1	1	1	1
524		1999	12	Bambino	M	1	1		1	1	1	1	1	1	1	1	1	1	1	1	1	1	1	1	1	2	1	1	1	4	1	1	1	1	1		1	1	4	4	1	1	4	1	1	1	1	1	1
525		1999	13	Bambino	M	1	1		1	1	1	1	1	1	1	1	1	1	1	1	1	1	1	1	1	6	4	1	1	3	1	1	1	1	1		3	1	1	1	1	1	1	1	1	1	1	1	1
526		1999	7	Bambino	M	1	1		1	1	1	1	1	1	1	1	1	1	1	1	1	1	1	1	1	1	1	1	1	1	1	1	1	1	1		1	1	1	1	1	1	1	1	1	1	1	1	1
527		1999	6	Bambino	M	1	1		1	1	1	1	1	1	1	1	1	1	1	1	1	1	1	1	1	1	1	1	1	1	1	1	1	1	1		1	1	1	1	1	1	1	1	1	1	1	1	1
528		1999	8	Bambino	M	1	1		1	1	1	1	1	1	1	1	1	1	1	1	1	1	1	1	1	1	1	1	1	1	1	1	1	1	1	Manca campione	1	1	1	1	1	1	1	1	1	1	1	1	1
529		1999	7	Bambino	M	1	1		1	1	1	1	1	1	1	1	1	1	1	1	1	1	1	1	1	5	4	1	1	1	1	1	1	1	1	N.E.	1	1	4	1	1	1	5	2	4	1	1	1	1
[truncated: 11 more columns]

## Sheet: 1996_Children
IDContator		Anno	Eta	Genere	EMDNHnana	EMDNHdimin	EMDNAltro	EMDNCGlamb	EMDNTGlamb	EMDNCCmesn	EMDNTCmesn	EMDNIbelli	EMDNShomin	EMDNAlumbr	EMDNTtrich	EMDNAncilo	EMDNSsterc	EMDNCapill	EMDNEvermi	EMDNCBcoli	EMDNTBcoli	EMCNCEhist	EMCNTEhist	EMCNCalter	EMCNCEcoli	EMCNTEcoli	EMCNCEnana	EMCNTEnana	EMCNCIbuts	EMCNTIbuts	EMCNCEhart	EMCNTEhart	EMCNHnana	EMCNHdimin	EMCNAltro	EMCNCGlamb	EMCNTGlamb	EMCNCCmesn	EMCNTCmesn	EMCNIbelli	EMCNShomin	EMCNAlumbr	EMCNTtrich	EMCNAncilo	EMCNSsterc	EMCNCapill	EMCNEvermi	EMCNCBcoli	EMCNTBcoli
1		1996	6	F	1	1		1	1	1	1	1	1	1	1	1	1	1	1	1	1	1	1	4	4	4	1	1	1	1	1	1	1	1		1	1	1	1	1	1	6	6	4	4	1	1	1	1
2		1996	6	F	1	1		1	1	1	1	1	1	1	1	1	1	1	1	1	1	1	1	1	6	1	1	1	4	1	1	1	1	1		1	1	4	1	1	1	7	1	1	1	1	1	1	1
3		1996	6	S	1	1		1	1	1	1	1	1	1	1	1	1	1	1	1	1	1	1	4	4	4	1	1	1	1	1	1	1	1		6	1	1	1	1	1	5	4	1	1	1	1	1	1
4		1996	6	F	1	1		1	1	1	1	1	1	1	1	1	1	1	1	1	1	1	1	1	7	7	1	1	1	1	1	1	1	1		1	1	4	4	1	1	5	4	1	1	1	1	1	1
5		1996	6	F	1	1		1	1	1	1	1	1	1	1	1	1	1	1	1	1	1	1	1	5	5	4	1	1	1	1	1	1	1		5	1	1	1	1	1	5	5	1	5	1	1	1	1
6		1996	5	M	1	1		1	1	1	1	1	1	1	1	1	1	1	1	1	1	1	1	1	1	1	1	1	1	1	1	1	1	1		1	1	1	1	1	1	5	6	1	1	1	1	1	1
7		1996	11	M	1	1		1	1	1	1	1	1	1	1	1	1	1	1	1	1	1	1	1	1	4	1	1	1	1	1	1	1	1		1	1	4	1	1	1	7	4	1	1	1	1	1	1
8		1996	7	M	1	1		1	1	1	1	1	1	1	1	1	1	1	1	1	1	1	1	1	1	1	1	1	1	1	1	1	1	1	B. hominis	1	1	1	1	1	1	1	1	1	1	1	1	1	1
9		1996	6	F	1	1		1	1	1	1	1	1	1	1	1	1	1	1	1	1	1	1	1	1	4	1	1	1	1	1	1	1	1		1	1	1	1	1	1	6	1	1	4	1	1	1	1
10		1996	5	F	1	1		1	1	1	1	1	1	1	1	1	1	1	1	1	1	1	1	1	1	1	1	1	1	1	1	1	1	1		1	1	1	1	1	1	6	4	5	1	1	1	1	1
11		1996	6	M	1	1		1	1	1	1	1	1	1	1	1	1	1	1	1	1	1	1	1	6	6	1	1	1	1	1	1	1	1		1	1	1	1	1	1	1	1	1	4	1	1	1	1
12		1996	8	M	1	1		1	1	1	1	1	1	1	1	1	1	1	1	1	1	1	1	1	1	1	1	1	1	1	1	1	1	1	Numerose B. hominis	1	1	1	1	1	1	6	4	1	1	1	1	1	1
13		1996	6	M	1	1		1	1	1	1	1	1	1	1	1	1	1	1	1	1	1	1	1	5	5	1	1	1	1	1	1	1	1		5	1	4	1	1	1	1	4	1	1	1	1	1	1
14		1996	6	M	1	1		1	1	1	1	1	1	1	1	1	1	1	1	1	1	1	1	1	5	5	4	1	1	1	4	1	1	1	1 uovo D. dendriticum	1	1	1	1	1	1	7	4	1	1	1	1	1	1
15		1996	6	M	1	1		1	1	1	1	1	1	1	1	1	1	1	1	1	1	1	1	1	4	1	1	1	1	1	1	1	1	1		1	1	5	1	1	1	5	7	1	1	1	1	1	1
16		1996	6	F	1	1		1	1	1	1	1	1	1	1	1	1	1	1	1	1	1	1	1	1	1	1	1	1	1	1	1	1	1		1	1	1	1	1	1	6	4	4	1	1	1	1	1
17		1996	6	M	1	1		1	1	1	1	1	1	1	1	1	1	1	1	1	1	1	1	1	1	4	1	1	1	1	1	1	1	1		1	1	1	1	1	1	6	4	4	1	1	1	1	1
18		1996		F	1	1		1	1	1	1	1	1	1	1	1	1	1	1	1	1	1	1	4	5	1	1	1	1	1	1	1	1	1		1	1	1	1	1	1	1	6	1	1	1	1	1	1
19		1996	5	F	1	1		1	1	1	1	1	1	1	1	1	1	1	1	1	1	1	1	1	4	1	1	1	1	1	1	1	1	1		5	1	1	1	1	1	7	5	1	1	1	1	1	1
20		1996	7	M	1	1		1	1	1	1	1	1	1	1	1	1	1	1	1	1	1	1	1	4	6	4	1	1	1	1	1	4	1		1	1	5	1	1	1	4	4	1	4	1	1	1	1
21		1996	7	F	1	1		1	1	1	1	1	1	1	1	1	1	1	1	1	1	1	1	5	7	6	1	1	5	1	1	1	1	1		1	1	1	1	1	1	1	1	1	1	1	1	1	1
22		1996	10	M	1	1		1	1	1	1	1	1	1	1	1	1	1	1	1	1	1	1	1	5	5	1	1	1	1	1	1	1	1		1	1	1	1	1	1	1	4	1	1	1	1	1	1
23		1996	9	F	1	1		1	1	1	1	1	1	5	5	1	5	1	1	1	1	1	1	1	7	7	1	1	1	1	1	1	1	1		1	1	1	1	1	1	7	6	1	6	1	1	1	1
24		1996	7	F	1	1		1	1	1	1	1	1	6	5	1	1	1	1	1	1	1	1	1	1	1	1	1	1	1	1	1	1	1		1	1	4	4	1	1	5	5	1	1	1	1	1	1
25		1996	6	M	1	1		1	1	1	1	1	1	1	1	1	1	1	1	1	1	1	1	1	5	1	1	1	1	1	1	1	1	1		1	1	1	1	1	1	6	7	1	1	1	1	1	1
26		1996	7	M	1	1		1	1	1	1	1	1	1	1	1	1	1	1	1	1	1	1	1	1	5	1	1	1	1	1	1	1	1		1	1	1	1	1	1	6	7	1	1	1	1	1	1
27		1996	7	M	1	1		1	1	1	1	1	1	4	4	1	1	1	1	1	1	1	1	1	1	1	1	1	1	1	1	1	1	1		1	1	1	1	1	1	7	6	1	1	1	1	1	1
28		1996	7	F	1	1		1	1	1	1	1	1	1	1	1	1	1	1	1	1	1	1	1	1	1	1	1	1	1	1	1	1	1		5	1	1	1	1	1	1	5	1	1	1	1	1	1
29		1996	6	M	1	1		1	1	1	1	1	1	1	1	1	1	1	1	1	1	1	1	1	6	1	1	1	1	1	1	1	1	1		1	1	1	1	1	1	6	5	1	1	1	1	1	1
30		1996	8	M	1	1		1	1	1	1	1	1	1	1	1	1	1	1	1	1	1	1	1	1	1	1	1	1	1	1	1	1	1		5	1	1	1	1	1	1	5	5	1	1	1	1	1
31		1996	5	M	1	1		1	1	1	1	1	1	1	1	1	1	1	1	1	1	1	1	1	1	1	1	1	1	1	1	1	1	1		1	1	1	1	1	1	5	5	1	1	1	1	1	1
32		1996	7	M	1	1		1	1	1	1	1	1	1	1	1	1	1	1	1	1	1	1	1	1	1	1	1	1	1	1	1	1	1		1	1	1	1	1	1	5	5	1	1	1	1	1	1
33		1996	11	F	1	1		1	1	1	1	1	1	5	5	1	1	1	1	1	1	1	1	1	5	1	1	5	5	1	1	1	1	1		1	1	1	1	1	1	5	5	1	1	1	1	1	1
34		1996	6	M	1	1		4	1	1	1	1	1	1	4	1	1	1	1	1	1	1	1	1	5	5	1	1	1	1	1	1	1	1		5	1	1	1	1	1	1	5	1	1	1	1	1	1
35		1996	6	F	1	1		1	1	1	1	1	1	1	1	1	1	1	1	1	1	1	1	1	1	1	1	1	1	1	1	1	1	1		5	1	1	1	1	1	5	1	1	1	1	1	1	1
36		1996	7	F	1	1		1	1	1	1	1	1	1	1	1	1	1	1	1	1	1	1	1	7	1	5	1	1	1	1	1	1	1		1	1	5	1	1	1	5	5	1	1	1	1	1	1
37		1996	6	M	1	1		1	1	1	1	1	1	1	1	1	1	1	1	1	1	1	1	1	5	1	1	1	5	1	1	1	1	1		1	1	1	1	1	1	5	1	1	1	1	1	1	1
38		1996	6	F	1	1		1	1	1	1	1	1	1	1	1	1	1	1	1	1	1	1	1	7	1	1	1	1	1	1	1	1	1		1	1	6	1	1	1	5	5	1	1	1	1	1	1
39		1996	7	M	1	1		1	1	1	1	1	1	1	1	1	1	1	1	1	1	1	1	1	1	1	1	1	1	1	1	1	1	1		1	1	1	1	1	1	5	5	1	7	1	1	1	1
40		1996	9	M	1	1		5	1	1	1	1	1	5	5	1	1	1	1	1	1	1	1	1	1	1	5	1	1	1	1	1	1	1		5	1	1	1	1	1	5	4	1	1	1	1	1	1
41		1996	7	M	1	1		1	1	1	1	1	1	1	1	1	1	1	1	1	1	1	1	1	1	1	1	1	1	1	1	1	1	1		1	1	1	1	1	1	5	7	1	1	1	1	1	1
42		1996	12	M	1	1		1	1	1	1	1	1	5	5	1	1	1	1	1	1	1	1	1	5	5	1	1	1	1	1	1	1	1		1	1	1	1	1	1	5	6	1	1	1	1	1	1
43		1996	6	F	1	1		1	1	1	1	1	1	1	1	1	1	1	1	1	1	1	1	5	6	5	1	1	1	1	1	1	1	1		1	1	1	1	1	1	5	5	1	1	1	1	1	1
44		1996	7	F	1	1		1	1	1	1	1	1	1	1	1	1	1	1	1	1	1	1	6	6	1	5	1	1	1	1	1	1	1		1	1	1	1	1	1	7	7	1	1	1	1	1	1
45		1996	9	M	1	1		1	1	1	1	1	1	1	1	1	1	1	1	1	1	1	1	5	6	1	1	1	1	1	1	1	1	1		1	1	1	1	1	1	7	7	6	5	1	1	1	1
46		1996	11	M	1	1		1	1	1	1	1	1	1	1	1	1	1	1	1	1	1	1	1	6	1	1	1	1	1	1	1	1	1		1	1	1	1	1	1	7	6	1	5	1	1	1	1
47		1996	9	F	1	1		1	1	1	1	1	1	1	1	1	1	1	1	1	1	1	1	1	1	1	1	1	1	1	1	1	1	1		1	1	1	1	1	1	7	7	1	7	1	1	1	1
48		1996	7	M	1	1		1	1	1	1	1	1	1	1	1	1	1	1	1	1	1	1	1	1	1	1	1	1	1	1	1	1	1		1	1	1	1	1	1	6	5	1	1	1	1	1	1
49		1996	10	M	1	1		1	1	1	1	1	1	1	1	1	1	1	1	1	1	1	1	1	1	1	1	1	1	1	1	1	1	1		1	1	1	1	1	1	7	7	5	1	1	1	1	1
50		1996	8	M	1	1		1	1	1	1	1	1	1	1	1	1	1	1	1	1	1	1	6	6	4	5	1	1	1	1	1	1	1		1	1	1	1	1	1	6	6	5	6	1	1	1	1
51		1996	10	F	1	1		1	1	1	1	1	1	1	1	1	1	1	1	1	1	1	1	1	1	1	1	1	1	1	1	1	1	1		1	1	1	1	1	1	7	7	5	1	1	1	1	1
52		1996	11	M	1	1		4	1	1	1	1	1	5	4	1	1	1	1	1	1	1	1	1	1	1	1	1	1	1	1	1	1	1		1	1	1	1	1	1	6	5	5	1	1	1	1	1
53		1996	10	M	1	1		1	1	1	1	1	1	1	1	1	1	1	1	1	1	1	1	1	1	1	1	7	1	1	1	1	1	1		1	1	1	1	1	1	7	6	1	5	1	1	1	1
54		1996	8	M	1	1		1	1	1	1	1	1	1	1	1	1	1	1	1	1	1	1	1	1	1	1	1	1	1	1	1	1	1		1	1	1	1	1	1	7	7	6	5	1	1	1	1
55		1996	8	F	1	1		1	1	1	1	1	1	4	4	4	1	1	1	1	1	1	1	1	1	1	1	1	1	1	1	1	1	1		1	1	1	1	1	1	6	6	1	1	1	1	1	1
56		1996	6	M	1	1		1	1	1	1	1	1	1	1	1	1	1	1	1	1	1	1	1	5	5	1	1	1	1	1	1	1	1		1	1	1	1	1	1	7	5	1	1	1	1	1	1
57		1996	9	F	1	1		1	1	1	1	1	1	1	1	1	1	1	1	1	1	4	1	5	5	1	5	1	5	1	1	1	1	1		1	1	1	1	1	1	6	6	1	5	1	1	1	1
58		1996	9	M	1	1		1	1	1	1	1	1	1	1	1	1	1	1	1	1	1	1	1	7	1	1	1	5	1	1	1	1	1		1	1	5	1	1	1	1	5	1	1	1	1	1	1
59		1996	8	M	1	1		1	1	1	1	1	1	1	1	1	1	1	1	1	1	1	1	5	5	1	1	1	1	1	1	1	1	1		6	1	6	1	1	1	5	5	1	1	1	1	1	1
60		1996	6	F	1	1		1	1	1	1	1	1	1	1	1	1	1	1	1	1	1	1	1	1	1	1	1	1	1	1	1	1	1		1	1	1	1	1	1	1	1	1	1	1	1	1	1
61		1996	6	F	1	1		1	1	1	1	1	1	4	4	1	1	1	1	1	1	1	1	1	1	1	1	1	1	1	1	1	1	1		1	1	1	1	1	1	1	4	1	1	1	1	1	1
62		1996	6	F	1	1		1	1	1	1	1	1	4	4	1	4	1	1	1	1	1	1	1	1	1	1	1	1	1	1	1	1	1		1	1	1	1	1	1	7	6	1	5	1	1	1	1
63		1996	8	M	1	1		1	1	1	1	1	1	1	1	1	1	1	1	1	1	1	1	1	1	1	1	1	1	1	1	1	1	1		1	1	1	1	1	1	6	5	1	6	1	1	1	1
64		1996	7	M	1	1		1	1	1	1	1	1	4	4	1	1	1	1	1	1	1	1	1	1	1	1	1	1	1	1	1	1	1		1	1	1	1	1	1	6	5	1	1	1	1	1	1
65		1996	6	F	1	1		1	1	1	1	1	1	1	4	1	1	1	1	1	1	1	1	1	1	1	1	1	1	1	1	1	1	1		1	1	1	1	1	1	1	5	1	1	1	1	1	1
66		1996	11	M	1	1		1	1	1	1	1	1	1	1	1	1	1	1	1	1	1	1	1	4	4	4	1	1	1	1	1	1	1		4	1	1	1	1	1	1	6	5	1	1	1	1	1
67		1996	11	M	1	1		1	1	1	1	1	1	1	1	1	1	1	1	1	1	1	1	1	7	1	1	1	1	1	1	1	1	1		1	1	1	1	1	1	5	4	1	5	1	1	1	1
68		1996	6	F	1	1		1	1	1	1	1	1	1	1	1	1	1	1	1	1	1	1	7	1	1	1	1	5	1	1	1	1	1		1	1	1	1	1	1	5	7	1	5	1	1	1	1
69		1996	6	M	1	1		1	1	1	1	1	1	1	1	1	1	1	1	1	1	1	1	1	7	7	5	1	1	1	1	1	1	1		5	1	1	1	1	1	1	6	1	1	1	1	1	1
70		1996	8	M	1	1		1	1	1	1	1	1	4	4	1	1	1	1	1	1	1	1	1	1	1	6	1	1	1	1	1	1	1		1	1	5	1	1	1	7	6	1	1	1	1	1	1
71		1996	6	F	1	1		1	1	1	1	1	1	1	1	1	1	1	1	1	1	1	1	1	1	1	1	1	1	1	1	1	1	1		1	1	1	1	1	1	5	5	1	1	1	1	1	1
72		1996	6	F	1	1		1	1	1	1	1	1	1	1	1	1	1	1	1	1	1	1	1	1	1	1	1	1	1	1	1	1	1		1	1	1	1	1	1	7	6	1	5	1	1	1	1
73		1996	8	M	1	1		1	1	1	1	1	1	1	1	1	1	1	1	1	1	1	1	4	5	4	1	1	1	1	1	1	1	1		1	1	1	1	1	1	5	5	1	4	1	1	1	1
74		1996	10	F	1	1		1	1	1	1	1	1	1	1	1	1	1	1	1	1	1	1	1	5	1	1	1	1	1	1	1	1	1		1	1	1	1	1	1	5	7	6	1	1	1	1	1
75		1996	8	F	1	1		1	1	1	1	1	1	1	1	1	1	1	1	1	1	1	1	1	5	1	1	1	5	1	1	1	1	1		1	1	1	1	1	1	5	6	1	1	1	1	1	1
76		1996	8	F	1	1		1	1	1	1	1	1	1	1	1	1	1	1	1	1	1	1	1	6	1	5	1	1	1	1	1	1	1		5	1	5	1	1	1	7	5	1	5	1	1	1	1
77		1996	8	M	1	1		1	1	1	1	1	1	1	1	1	1	1	1	1	1	1	1	1	1	1	1	1	1	1	1	1	1	1		1	1	1	1	1	1	7	5	1	5	1	1	1	1
78		1996	9	F	1	1		1	1	1	1	1	1	1	1	1	1	1	1	1	1	1	1	1	5	1	1	1	1	1	1	1	1	1		1	1	1	1	1	1	5	5	1	7	1	1	1	1
79		1996	7	F	1	1		1	1	1	1	1	1	1	1	1	1	1	1	1	1	1	1	1	7	1	5	1	5	1	1	1	1	1		1	1	1	1	1	1	1	5	1	5	1	1	1	1
80		1996	6	F	1	1		1	1	1	1	1	1	1	1	1	1	1	1	1	1	1	1	1	5	1	1	1	1	1	1	1	1	1		1	1	1	1	1	1	1	1	1	5	1	1	1	1
81		1996	8	F	1	1		1	1	1	1	1	1	1	1	1	1	1	1	1	1	1	1	1	1	1	3	1	1	1	1	1	1	1		1	1	1	1	1	1	6	5	1	1	1	1	1	1
82		1996	12	F	1	1		1	1	1	1	1	1	1	1	1	1	1	1	1	1	1	1	1	1	1	1	1	1	1	1	1	1	1		1	1	2	1	1	1	5	5	1	1	1	1	1	1
83		1996	8	F	1	1		1	1	1	1	1	1	1	1	1	1	1	1	1	1	1	1	1	5	1	4	1	5	1	1	1	1	1		7	1	1	1	1	1	5	5	1	1	1	1	1	1
84		1996	5	M	1	1		1	1	1	1	1	1	1	1	1	1	1	1	1	1	1	1	1	1	1	1	1	1	1	1	1	1	1		1	1	1	1	1	1	1	4	1	1	1	1	1	1
85		1996	9	F	1	1		1	1	1	1	1	1	1	1	1	1	1	1	1	1	1	1	1	1	1	1	1	1	1	1	1	1	1		1	1	1	1	1	1	1	4	1	1	1	1	1	1
86		1996	6	F	1	1		1	1	1	1	1	1	1	1	1	1	1	1	1	1	1	1	1	1	1	1	1	1	1	1	1	1	1		1	1	1	1	1	1	6	5	4	4	1	1	1	1
87		1996	7	M	1	1		1	1	1	1	1	1	1	1	1	1	1	1	1	1	1	1	1	1	1	1	1	1	1	1	1	1	1		1	1	1	1	1	1	5	6	4	4	1	1	1	1
88		1996	10	M	1	1		1	1	1	1	1	1	1	1	1	1	1	1	1	1	1	1	1	1	1	1	1	1	1	1	1	1	1	Cisti piccole alterate	4	1	1	1	1	1	5	6	1	1	1	1	1	1
89		1996	5	M	1	1		1	1	1	1	1	1	1	1	1	1	1	1	1	1	1	1	1	6	5	1	1	4	1	1	1	1	1		1	1	1	1	1	1	7	4	1	4	1	1	1	1
90		1996	10	M	1	1		1	1	1	1	1	1	1	1	1	1	1	1	1	1	1	1	1	1	1	1	1	1	1	1	1	1	1		1	1	1	1	1	1	5	5	1	4	1	1	1	1
91		1996	10	F	1	1		1	1	1	1	1	1	1	1	1	1	1	1	1	1	1	1	5	5	1	6	1	1	1	1	1	1	1		1	1	1	1	1	1	7	7	5	6	1	1	1	1
92		1996	8	M	1	1		1	1	1	1	1	1	1	1	1	1	1	1	1	1	1	1	1	1	1	1	1	1	1	1	1	1	1		7	1	1	1	1	1	7	7	1	1	1	1	1	1
93		1996	8	F	1	1		1	1	1	1	1	1	1	1	1	1	1	1	1	1	1	1	1	1	1	1	1	1	1	1	1	1	1	Numerosissime B. hominis	1	1	1	1	1	1	7	7	5	1	1	1	1	1
94		1996	8	F	1	1		1	1	1	1	1	1	1	1	1	1	1	1	1	1	1	1	1	4	1	1	1	1	1	1	1	1	1	Cisti E. hominis	1	1	1	1	1	1	1	1	1	1	1	1	1	1
95		1996	11	F	1	1		1	1	1	1	1	1	1	1	1	1	1	1	1	1	1	1	5	6	1	1	1	1	1	1	1	1	1		1	1	1	1	1	1	7	6	5	1	1	1	1	1
96		1996	11	F	1	1		1	1	1	1	1	1	1	1	1	1	1	1	1	1	1	1	1	1	1	1	1	6	1	1	1	1	1		1	1	1	1	1	1	1	6	1	1	1	1	1	1
97		1996	9	M	1	1		1	1	1	1	1	1	1	1	1	1	1	1	1	1	1	1	1	1	1	1	1	1	1	1	1	1	1		1	1	1	1	1	1	5	6	1	1	1	1	1	1
98		1996	7	M	1	1		1	1	1	1	1	1	1	1	1	1	1	1	1	1	1	1	1	1	1	1	1	1	1	1	1	1	1		1	1	1	1	1	1	7	5	1	7	1	1	1	1
99		1996	10	M	1	1		1	1	1	1	1	1	1	1	1	1	1	1	1	1	1	1	5	6	1	1	1	1	1	1	1	1	1		1	1	1	1	1	1	6	6	5	1	1	1	1	1
100		1996	7	M	1	1		1	1	1	1	1	1	1	1	1	1	1	1	1	1	1	1	5	6	4	5	1	1	1	1	1	1	1		1	1	5	1	1	1	1	1	1	1	1	1	1	1
101		1996	7	F	1	1		1	1	1	1	1	1	1	1	1	1	1	1	1	1	1	1	4	7	1	1	1	1	1	1	1	1	1		1	1	5	1	1	1	1	6	1	6	1	1	1	1
102		1996	8	M	1	1		1	1	1	1	1	1	1	1	1	1	1	1	1	1	1	1	1	4	1	1	1	1	1	1	1	1	1		1	1	1	1	1	1	1	5	1	1	1	1	1	1
103		1996	7	F	1	1		1	1	1	1	1	1	1	1	1	1	1	1	1	1	1	1	1	6	1	1	1	1	1	1	1	7	1		7	1	5	1	1	1	1	1	1	1	1	1	1	1
104		1996	12	M	1	1		1	1	1	1	1	1	1	1	1	1	1	1	1	1	1	1	1	4	4	1	1	1	1	1	1	1	1		1	1	1	1	1	1	7	7	5	6	1	1	1	1
105		1996	6	M	1	1		1	1	1	1	1	1	1	1	1	1	1	1	1	1	1	1	1	1	1	1	1	1	1	1	1	1	1		1	1	1	1	1	1	1	5	1	1	1	1	1	1
106		1996	8	F	1	1		1	1	1	1	1	1	1	1	1	1	1	1	1	1	1	1	1	4	1	1	1	1	1	1	1	1	1		1	1	1	1	1	1	7	6	1	1	1	1	1	1
107		1996	6	F	1	1		1	1	1	1	1	1	6	6	1	1	1	1	1	1	1	1	1	1	1	1	1	1	1	1	1	1	1		1	1	1	1	1	1	6	6	1	1	1	1	1	1
108		1996	9	M	1	1		1	1	1	1	1	1	5	5	1	1	1	1	1	1	1	1	1	1	1	1	1	1	1	1	1	1	1		1	1	1	1	1	1	5	5	1	1	1	1	1	1
109		1996	11	F	1	1		1	1	1	1	1	1	6	5	1	1	1	1	1	1	1	1	1	2	1	1	1	1	1	1	1	1	1		1	1	1	1	1	1	6	5	5	1	1	1	1	1
110		1996	11	F	1	1		1	1	1	1	1	1	1	1	1	1	1	1	1	1	1	1	1	4	4	1	1	1	1	1	1	1	1		1	1	1	1	1	1	6	5	1	5	1	1	1	1
111		1996	7	F	1	1		1	1	1	1	1	1	5	5	5	1	1	1	1	1	1	1	1	1	1	1	1	1	1	1	1	1	1		1	1	1	1	1	1	5	5	4	1	1	1	1	1
112		1996	8	M	1	1		1	1	1	1	1	1	5	5	1	1	1	1	1	1	1	1	1	1	1	1	1	1	1	1	1	1	1		1	1	1	1	1	1	5	5	1	1	1	1	1	1
113		1996	6	F	1	1		1	1	1	1	1	1	6	6	1	1	1	1	1	1	1	1	1	1	1	1	1	1	1	1	1	1	1		1	1	1	1	1	1	6	6	1	1	1	1	1	1
114		1996	10	F	1	1		1	1	1	1	1	1	5	1	1	1	1	1	1	1	1	1	1	5	5	5	1	1	1	1	1	1	1		1	1	1	1	1	1	5	4	1	1	1	1	1	1
115		1996	11	M	1	1		1	1	1	1	1	1	1	1	1	1	1	1	1	1	1	1	1	1	1	1	1	1	1	1	1	1	1		1	1	1	1	1	1	1	1	1	1	1	1	1	1
116		1996	12	F	1	1		1	1	1	1	1	1	5	1	1	5	1	1	1	1	1	1	1	1	1	1	1	1	1	1	1	1	1		1	1	1	1	1	1	5	5	5	5	1	1	1	1
117		1996	9	M	1	1		1	1	1	1	1	1	5	1	5	1	1	1	1	1	1	1	1	1	1	1	1	1	1	1	1	1	1		1	1	1	1	1	1	5	5	5	1	1	1	1	1
118		1996	7	F	1	1		5	1	1	1	1	1	1	1	1	1	1	1	1	1	1	1	1	1	1	1	1	1	1	1	1	1	1		5	1	1	1	1	1	1	1	1	1	1	1	1	1
119		1996	8	F	1	1		1	1	1	1	1	1	5	1	1	1	1	1	1	1	1	1	1	1	1	1	1	1	1	1	1	1	1		1	1	1	1	1	1	5	5	1	1	1	1	1	1
120		1996	8	F	1	1		1	1	1	1	1	1	5	1	1	1	1	1	1	1	5	5	1	1	1	1	1	1	1	1	1	1	1	Trof. E. hominis	1	1	5	1	1	1	5	5	1	1	1	1	1	1
121		1996	10	M	1	1		1	1	1	1	1	1	5	1	1	1	1	1	1	1	1	1	1	1	1	1	1	1	1	1	1	1	1		1	1	1	1	1	1	5	5	1	1	1	1	1	1
122		1996	9	F	1	1		1	1	1	1	1	1	5	1	1	1	1	1	1	1	4	1	1	1	1	1	1	1	1	1	1	1	1		1	1	1	1	1	1	4	4	1	1	1	1	1	1
123		1996	7	F	1	1		1	1	1	1	1	1	5	5	1	1	1	1	1	1	1	1	1	1	1	1	1	1	1	1	1	1	1		1	1	1	1	1	1	5	5	1	1	1	1	1	1
124		1996	8	M	1	1		1	1	1	1	1	1	5	5	1	1	1	1	1	1	1	1	1	1	1	1	1	1	1	1	1	1	1		1	1	1	1	1	1	6	6	1	1	1	1	1	1
125		1996	7	F	1	1	Parecchie B. hominis	1	1	1	1	1	1	1	1	1	1	1	1	1	1	1	1	1	1	1	1	1	1	1	1	1	1	1	Parecchie B. hominis	1	1	1	1	1	1	1	1	1	1	1	1	1	1
126		1996	10	F	1	1		1	1	1	1	1	1	5	5	1	1	1	1	1	1	1	1	1	1	1	1	1	1	1	1	1	1	1		1	1	1	1	1	1	5	5	1	1	1	1	1	1
127		1996	9	M	1	1		1	1	1	1	1	1	5	1	1	1	1	1	1	1	6	1	1	6	1	1	1	1	1	1	1	1	1		1	1	1	1	1	1	5	1	1	1	1	1	1	1
128		1996	9	F	1	1		1	1	1	1	1	1	5	1	5	1	1	1	1	1	1	1	1	5	5	1	1	1	1	1	1	1	1		1	1	1	1	1	1	6	5	5	1	1	1	1	1
129		1996	7	M	1	1		6	1	1	1	1	1	1	1	1	1	1	1	1	1	1	1	1	1	1	5	1	1	1	1	1	1	1		6	1	1	1	1	1	1	1	1	1	1	1	1	1
130		1996	6	M	1	1		1	1	5	1	1	1	1	1	1	1	1	1	1	1	1	1	1	6	6	1	1	5	1	1	1	1	1		1	1	5	1	1	1	1	1	1	1	1	1	1	1
131		1996	13	M	1	1	Manca campione	1	1	1	1	1	1	1	1	1	1	1	1	1	1	1	1	1	1	1	1	1	1	1	1	1	1	1		1	1	1	1	1	1	1	1	1	1	1	1	1	1
132		1996	8	M	1	1		1	1	5	1	1	1	1	5	1	1	1	1	1	1	1	1	1	5	5	5	1	1	1	1	1	1	1		1	1	5	1	1	1	1	5	1	1	1	1	1	1
133		1996	9	M	1	1		1	1	1	1	1	1	5	1	1	1	1	1	1	1	1	1	1	5	5	1	1	1	1	1	1	1	1		1	1	1	1	1	1	6	4	1	1	1	1	1	1
134		1996	6	F	1	1		1	1	1	1	1	1	1	1	1	1	1	1	1	1	1	1	1	5	5	1	1	1	1	1	1	1	1		1	1	1	1	1	1	1	5	1	1	1	1	1	1
135		1996	8	M	1	1		1	1	1	1	1	1	1	4	1	1	1	1	1	1	1	1	1	5	1	5	1	1	1	1	1	1	1		1	1	1	1	1	1	1	5	1	1	1	1	1	1
136		1996	7	F	1	1		1	1	1	1	1	1	1	5	1	1	1	1	1	1	1	1	1	1	1	1	1	1	1	1	1	1	1		1	1	1	1	1	1	1	5	1	1	1	1	1	1
137		1996	10	M	1	1		1	1	1	1	1	1	7	5	5	1	1	1	1	1	1	1	1	1	1	1	1	1	1	1	1	1	1		1	1	1	1	1	1	7	5	5	1	1	1	1	1
138		1996	9	F	1	1		1	1	1	1	1	1	1	1	1	1	1	1	1	1	1	1	1	1	1	5	1	1	1	1	1	1	1		1	1	1	1	1	1	1	1	1	1	1	1	1	1
139		1996	11	M	1	1		1	1	1	1	1	1	5	1	1	1	1	1	1	1	1	1	1	1	1	1	1	1	1	1	1	1	1		1	1	1	1	1	1	5	1	1	1	1	1	1	1
140		1996	10	M	1	1		1	1	1	1	1	1	5	5	1	1	1	1	1	1	1	1	1	1	1	5	1	5	1	1	1	1	1		1	1	1	1	1	1	5	5	1	1	1	1	1	1
141		1996	9	F	1	1		1	1	1	1	1	1	5	5	1	5	1	1	1	1	1	1	1	1	1	1	1	1	1	1	1	1	1		1	1	1	1	1	1	5	6	1	6	1	1	1	1
142		1996	7	M	1	1		1	1	1	1	1	1	5	5	1	5	1	1	1	1	1	1	1	5	5	1	1	5	1	1	1	1	1		1	1	1	1	1	1	5	5	1	5	1	1	1	1
143		1996	8	M	1	1		5	1	1	1	1	1	5	5	5	1	1	5	1	1	1	1	1	1	1	5	1	1	1	1	1	1	1		5	1	1	1	1	1	5	5	5	1	1	5	1	1
144		1996	7	F	1	1		1	1	1	1	1	1	1	1	1	5	1	1	1	1	1	1	1	5	5	1	1	1	1	1	1	1	1		5	1	1	1	1	1	1	1	1	1	1	1	1	1
145		1996	8	M	1	1		1	1	1	1	1	1	1	1	1	1	1	1	1	1	1	1	1	2	1	1	1	5	1	1	1	1	1		5	1	1	1	1	1	1	4	5	1	1	1	1	1
146		1996	8	F	1	1		1	1	1	1	1	1	6	6	1	1	1	1	1	1	1	1	1	1	1	1	1	1	1	1	1	1	1		1	1	1	1	1	1	5	6	5	1	1	1	1	1
147		1996	7	F	1	1		1	1	1	1	1	1	5	5	1	5	1	1	1	1	1	1	1	1	1	1	1	1	1	1	1	1	1		1	1	1	1	1	1	5	5	1	5	1	1	1	1
148		1996	11	F	1	1		1	1	1	1	1	1	5	1	1	1	1	1	1	1	1	1	1	5	1	1	1	5	1	1	1	1	1		1	1	1	1	1	1	5	5	1	1	1	1	1	1
149		1996	11	M	1	1		1	1	1	1	1	1	5	5	6	1	1	1	1	1	1	1	1	1	1	1	1	1	1	1	1	1	1		1	1	1	1	1	1	5	5	5	1	1	1	1	1
150		1996	7	F	1	1		1	1	1	1	1	1	5	5	1	1	1	1	1	1	1	1	1	6	1	5	1	5	1	1	1	1	1		1	1	1	1	1	1	5	5	1	1	1	1	1	1
151		1996	7	F	1	1		1	1	1	1	1	1	6	5	1	1	1	1	1	1	1	1	1	1	1	1	1	1	1	1	1	1	1		1	1	1	1	1	1	7	5	1	1	1	1	1	1
152		1996	9	M	1	1		1	1	1	1	1	1	1	5	1	1	1	1	1	5	1	1	1	1	1	1	1	1	1	1	1	1	1		1	1	1	1	1	1	1	5	5	1	1	1	1	5
153		1996	9	F	1	1		1	1	1	1	1	1	1	5	1	1	1	1	1	1	1	1	1	5	1	1	1	6	1	1	1	1	1		1	1	1	1	1	1	1	5	1	1	1	1	1	1
154		1996	8	M	1	1		1	1	1	1	1	1	1	1	1	1	1	1	1	1	1	1	7	1	1	1	1	5	1	1	1	1	1		1	1	1	1	1	1	1	1	1	1	1	1	1	1
155		1996	8	F	1	1		1	1	1	1	1	1	5	5	1	1	1	1	1	1	1	1	1	1	1	1	1	1	1	1	1	1	1		5	1	1	1	1	1	6	5	5	1	1	1	1	1
156		1996	7	F	1	1		1	1	1	1	1	1	5	5	1	1	1	1	1	1	1	1	1	1	1	1	1	1	1	1	1	1	1		1	1	1	1	1	1	5	5	1	1	1	1	1	1
157		1996	8	M	1	1		1	1	1	1	1	1	5	4	1	5	1	1	1	1	1	1	1	1	1	1	1	1	1	1	1	1	1		1	1	1	1	1	1	5	5	1	5	1	1	1	1
158		1996	7	F	1	1		1	1	1	1	1	1	5	1	1	1	1	1	1	1	1	1	1	5	1	1	1	1	1	1	1	1	1		1	1	1	1	1	1	5	5	1	1	1	1	1	1
159		1996	12	F	1	1		5	1	1	1	1	1	5	5	1	1	1	1	1	1	1	1	1	1	1	1	1	1	1	1	1	1	1		5	1	1	1	1	1	5	5	1	1	1	1	1	1
160		1996	8	F	1	1		1	1	1	1	1	1	5	5	1	1	1	1	1	1	1	1	1	1	1	1	1	1	1	1	1	1	1		1	1	1	1	1	1	5	5	1	1	1	1	1	1
161		1996	9	M	1	1		1	1	1	1	1	1	5	1	1	1	1	1	1	1	1	1	1	6	1	4	1	1	1	1	1	1	1		1	1	1	1	1	1	5	5	1	1	1	1	1	1
162		1996	7	M	1	1		1	1	5	1	1	1	5	5	1	1	1	1	1	1	1	1	1	6	1	1	1	1	1	1	1	1	1		1	1	6	1	1	1	5	5	5	1	1	1	1	1
163		1996	7	M	1	1		1	1	1	1	1	1	5	5	1	1	1	1	1	1	1	1	1	1	1	1	1	1	1	1	1	1	1		1	1	1	1	1	1	5	5	1	1	1	1	1	1
164		1996	8	F	1	1		1	1	1	1	1	1	6	5	1	1	1	1	1	1	1	1	5	1	1	1	1	1	1	1	1	1	1		1	1	1	1	1	1	6	5	1	1	1	1	1	1
165		1996	11	F	1	1		1	1	1	1	1	1	6	5	1	1	1	1	1	1	1	1	1	1	1	1	1	1	1	1	1	1	1		1	1	1	1	1	1	6	5	1	1	1	1	1	1
166		1996	11	F	1	1		1	1	1	1	1	1	6	5	1	1	1	1	1	1	1	1	1	1	1	1	1	1	1	1	1	1	1		1	1	1	1	1	1	6	5	1	1	1	1	1	1
167		1996	9	M	1	1		1	1	1	1	1	1	6	5	1	1	1	1	1	1	1	1	1	5	1	1	1	1	1	1	1	1	1		1	1	1	1	1	1	5	5	1	1	1	1	1	1
168		1996	8	M	1	1		1	1	1	1	1	1	6	5	1	1	1	1	1	1	1	1	1	5	5	1	1	1	1	1	1	1	1		1	1	1	1	1	1	5	5	1	1	1	1	1	1
169		1996	10	F	1	1		1	1	1	1	1	1	5	5	1	1	1	1	1	1	1	1	1	5	1	5	1	5	1	1	1	1	1		1	1	1	1	1	1	5	5	1	1	1	1	1	1
170		1996	7	F	1	1		1	1	1	1	1	1	1	1	1	1	1	1	1	1	1	1	1	5	1	1	1	1	1	1	1	1	1		1	1	1	1	1	1	1	1	1	1	1	1	1	1
171		1996	6	F	1	1		1	1	1	1	1	1	5	5	1	5	1	1	1	1	1	1	1	1	1	1	1	1	1	1	1	1	1		1	1	1	1	1	1	5	5	1	5	1	1	1	1
172		1996	7	F	1	1		1	1	1	1	1	1	5	5	1	1	1	1	1	1	1	1	1	4	1	5	1	1	1	1	1	1	1		1	1	1	1	1	1	6	5	1	1	1	1	1	1
173		1996	8	F	1	1		1	1	1	1	1	1	1	5	1	5	1	1	1	1	1	1	1	4	1	1	1	1	1	1	1	1	1		1	1	1	1	1	1	1	5	1	5	1	1	1	1
174		1996	7	M	1	1		1	1	1	1	1	1	5	5	1	1	1	1	1	1	1	1	1	1	1	1	1	1	1	1	1	1	1		1	1	1	1	1	1	5	6	1	1	1	1	1	1
175		1996	6	F	1	1		1	1	1	1	1	1	1	1	1	1	1	1	1	1	1	1	1	1	1	1	1	1	1	1	1	1	1		1	1	1	1	1	1	1	1	1	1	1	1	1	1
176		1996	10	M	1	1		1	1	1	1	1	1	5	5	1	1	1	1	1	1	1	1	1	5	1	1	1	1	1	1	1	1	1		1	1	1	1	1	1	5	5	1	5	1	1	1	1
177		1996	8	M	1	1		5	1	1	1	1	1	5	5	1	1	1	1	1	1	1	1	1	5	5	1	1	1	1	1	1	1	1		5	5	1	1	1	1	5	5	1	1	1	1	1	1
178		1996	8	M	1	1		1	1	1	1	1	1	1	5	1	1	1	1	1	1	1	1	1	5	1	1	1	1	1	1	1	1	1		1	1	1	1	1	1	1	5	1	1	1	1	1	1
179		1996	8	F	1	1		1	1	1	1	1	1	5	5	1	1	1	1	1	1	1	1	1	6	1	1	1	5	1	1	1	1	1		1	1	1	1	1	1	6	5	1	1	1	1	1	1
180		1996	9	M	1	1		5	1	1	1	1	1	5	5	1	1	1	1	1	1	1	1	1	1	1	1	1	1	1	1	1	1	1		5	1	1	1	1	1	6	5	1	1	1	1	1	1
181		1996	10	M	1	1		1	1	1	1	1	1	1	5	1	1	1	1	1	1	1	1	1	4	1	1	1	1	1	1	1	1	1		1	1	1	1	1	1	1	5	5	1	1	1	1	1
182		1996	6	F	1	1		1	1	1	1	1	1	1	1	1	1	1	1	1	1	1	1	1	1	1	1	1	1	1	1	1	1	1		1	1	1	1	1	1	1	5	1	1	1	1	1	1
183		1996	10	F	1	1		1	1	1	1	1	1	1	5	1	1	1	1	1	1	1	1	1	5	1	1	1	4	1	1	1	1	1		1	1	1	1	1	1	1	6	5	5	1	1	1	1
184		1996	7	M	1	1		1	1	1	1	1	1	1	5	1	1	1	1	1	1	1	1	1	1	1	1	1	1	1	1	1	1	1		1	1	1	1	1	1	1	5	1	1	1	1	1	1
185		1996	10	F	1	1		1	1	1	1	1	1	5	5	1	1	1	1	1	1	1	1	1	5	1	5	1	1	1	1	1	1	1	Cisti molto alterate	1	1	1	1	1	1	5	6	1	5	1	1	1	1
186		1996	9	F	1	1		1	1	1	1	1	1	5	5	1	1	1	1	1	1	6	1	1	1	1	1	1	1	1	1	1	1	1		1	1	1	1	1	1	5	5	1	1	1	1	1	1
187		1996	8	F	1	1		1	1	1	1	1	1	5	1	1	5	1	1	1	1	1	1	1	1	1	1	1	1	1	1	1	1	1		1	1	1	1	1	1	5	1	1	5	1	1	1	1
188		1996	13	F	1	1		1	1	1	1	1	1	5	5	5	1	1	1	1	1	1	1	1	1	1	1	1	1	1	1	1	1	1		1	1	1	1	1	1	5	5	5	1	1	1	1	1
189		1996	11	F	1	1		1	1	1	1	1	1	5	5	1	1	1	1	1	1	6	1	1	6	1	5	1	1	1	1	1	1	1		1	1	1	1	1	1	5	5	1	1	1	1	1	1
190		1996	10	F	1	1		1	1	1	1	1	1	5	5	1	1	1	1	1	1	5	1	1	5	1	1	1	1	1	1	1	1	1		1	1	1	1	1	1	5	5	1	1	1	1	1	1
191		1996	10	M	1	1		5	1	1	1	1	1	5	5	1	1	1	1	1	1	1	1	1	5	1	1	1	1	1	1	1	1	1		5	5	1	1	1	1	5	5	1	1	1	1	1	1
192		1996	14	M	1	1		1	1	1	1	1	1	5	5	5	1	1	1	1	1	1	1	1	1	1	1	1	1	1	1	1	1	1		1	1	1	1	1	1	5	5	5	1	1	1	1	1
193		1996	13	F	1	1		1	1	1	1	1	1	6	5	1	1	1	1	1	1	1	1	1	1	1	1	1	1	1	1	1	1	1		1	1	1	1	1	1	6	5	1	1	1	1	1	1
194		1996	9	F	1	1		5	1	1	1	1	1	1	1	1	1	1	1	1	1	5	1	1	5	1	5	1	1	1	1	1	1	1		5	1	1	1	1	1	1	5	1	1	1	1	1	1
195		1996	12	F	1	1		5	1	1	1	1	1	5	1	1	1	1	1	1	1	1	1	1	1	1	1	1	1	1	1	1	1	1		5	1	1	1	1	1	5	5	1	1	1	1	1	1
196		1996	11	M	1	1		1	1	1	1	1	1	5	5	5	1	1	1	1	1	1	1	1	1	1	1	1	1	1	1	1	1	1		1	1	1	1	1	1	5	5	5	1	1	1	1	1
197		1996	11	M	1	1		1	1	1	1	1	1	5	5	1	1	1	1	1	1	1	1	1	1	1	1	1	1	1	1	1	1	1		1	1	1	1	1	1	5	5	1	1	1	1	1	1
198		1996	12	F	1	1		1	1	1	1	1	1	1	1	1	1	1	1	1	1	1	1	1	1	1	1	1	1	1	1	1	1	1		1	1	1	1	1	1	1	1	5	1	1	1	1	1
199		1996	11	M	1	1		1	1	1	1	1	1	1	1	1	5	1	1	1	1	1	1	1	1	1	1	1	1	1	1	1	1	1		1	1	1	1	1	1	1	1	1	5	1	1	1	1
200		1996	11	F	1	1		1	1	1	1	1	1	1	1	1	1	1	1	1	1	1	1	1	1	1	1	1	1	1	1	1	1	1		1	1	1	1	1	1	1	5	1	5	1	1	1	1
201		1996		S	1	1		1	1	1	1	1	1	1	1	1	1	1	1	1	1	1	1	1	1	1	1	1	1	1	1	1	1	1		1	1	1	1	1	1	5	1	5	1	1	1	1	1
202		1996		S	1	1		1	1	1	1	1	1	1	1	1	1	1	1	1	1	1	1	1	5	1	1	1	4	1	1	1	1	1		1	1	1	1	1	1	1	1	1	1	1	1	1	1
203		1996		S	1	1		1	1	1	1	1	1	1	1	1	1	1	1	1	1	1	1	1	5	1	1	1	1	1	1	1	1	1		1	1	1	1	1	1	1	1	1	1	1	1	1	1
204		1996		S	1	1		1	1	1	1	1	1	1	1	1	1	1	1	1	1	1	1	1	1	1	1	1	1	1	1	1	1	1		1	1	1	1	1	1	1	1	1	1	1	1	1	1
205		1996	13	M	1	1		1	1	1	1	1	1	1	1	1	1	1	1	1	1	1	1	1	1	1	1	1	1	1	1	1	1	1		1	1	1	1	1	1	5	1	5	1	1	1	1	1
206		1996		S	1	1		1	1	1	1	1	1	1	1	1	1	1	1	1	1	1	1	1	5	1	5	1	5	1	1	1	1	1		1	1	1	1	1	1	1	1	1	1	1	1	1	1
207		1996	10	M	1	1		1	1	1	1	1	1	1	1	1	1	1	1	1	1	1	1	1	5	1	1	1	1	1	1	1	1	1		1	1	1	1	1	1	5	1	1	1	1	1	1	1
208		1996		S	1	1		1	1	1	1	1	1	1	1	1	1	1	1	1	1	1	1	1	1	1	1	1	1	1	1	1	1	1		1	1	1	1	1	1	5	1	1	1	1	1	1	1
209		1996		S	1	1		1	1	1	1	1	1	1	1	1	1	1	1	1	1	1	1	1	1	1	1	1	1	1	1	1	1	1		6	1	1	1	1	1	5	1	1	1	1	1	1	1
210		1996		S	1	1		1	1	1	1	1	1	1	1	1	1	1	1	1	1	1	1	1	5	1	1	1	1	1	1	1	1	1		1	1	5	1	1	1	6	1	1	1	1	1	1	1
211		1996		S	1	1		1	1	1	1	1	1	1	1	1	1	1	1	1	1	1	1	1	5	5	1	1	1	1	1	1	1	1		1	1	1	1	1	1	1	1	5	1	1	1	1	1
212		1996		S	1	1		1	1	1	1	1	1	1	1	1	1	1	1	1	1	1	1	1	6	1	1	1	1	1	1	1	1	1		1	1	1	1	1	1	1	1	1	1	1	1	1	1
213		1996		S	1	1		1	1	1	1	1	1	1	1	1	1	1	1	1	1	1	1	1	5	1	1	1	1	1	1	1	1	1		1	1	1	1	1	1	5	1	5	1	1	1	1	1
214		1996	16	S	1	1		1	1	1	1	1	1	1	1	1	1	1	1	1	1	1	1	1	1	1	1	1	4	1	1	1	1	1		1	1	1	1	1	1	1	1	1	1	1	1	1	1
215		1996	16	S	1	1		1	1	1	1	1	1	1	1	1	1	1	1	1	1	1	1	1	1	1	1	1	6	1	1	1	1	1		1	1	5	1	1	1	1	1	5	1	1	1	1	1
216		1996	15	S	1	1		1	1	1	1	1	1	1	1	1	1	1	1	1	1	1	1	1	6	6	5	1	1	1	1	1	1	1		1	1	1	1	1	1	1	1	1	1	1	1	1	1
217		1996	14	S	1	1		1	1	1	1	1	1	1	1	1	1	1	1	1	1	1	1	1	1	1	1	1	1	1	1	1	1	1		5	1	1	1	1	1	5	1	1	1	1	1	1	1
218		1996	16	S	1	1		1	1	1	1	1	1	1	1	1	1	1	1	1	1	1	1	1	1	1	1	1	1	1	1	1	1	1		1	1	1	1	1	1	5	1	1	1	1	1	1	1
219		1996	11	M	1	1		1	1	1	1	1	1	1	1	1	1	1	1	1	1	1	1	6	1	1	1	1	1	1	1	1	1	1		1	1	1	1	1	1	5	1	1	1	1	1	1	1
220		1996	15	S	1	1		1	1	1	1	1	1	1	1	1	1	1	1	1	1	5	1	1	5	1	1	1	1	1	1	1	1	1		1	1	1	1	1	1	1	1	1	1	1	1	1	1
221		1996	13	S	1	1		1	1	1	1	1	1	1	1	1	1	1	1	1	1	1	1	1	5	5	1	1	5	1	1	1	1	1		1	1	1	1	1	1	1	1	5	1	1	1	1	1
223		1996		S	1	1		1	1	1	1	1	1	1	1	1	1	1	1	1	1	5	1	1	1	1	1	1	1	1	1	1	1	1		1	1	1	1	1	1	1	1	1	1	1	1	1	1
224		1996	8	M	1	1		1	1	1	1	1	1	1	1	1	1	1	1	1	1	1	1	1	1	1	1	1	1	1	1	1	1	1		1	1	1	1	1	1	5	5	1	1	1	1	1	1
225		1996	8	S	1	1		1	1	1	1	1	1	1	1	1	1	1	1	1	1	1	1	1	1	1	1	1	1	1	1	1	1	1		1	1	1	1	1	1	1	1	1	1	1	1	1	1
226		1996		S	1	1		1	1	1	1	1	1	1	1	1	1	1	1	1	1	1	1	1	1	1	1	1	1	1	1	1	1	1		1	1	1	1	1	1	5	1	5	1	1	1	1	1
227		1996		S	1	1		1	1	1	1	1	1	1	1	1	1	1	1	1	1	1	1	4	7	1	1	1	1	1	1	1	1	1		1	1	1	1	1	1	6	1	5	1	1	1	1	1
228		1996		S	1	1		1	1	1	1	1	1	1	1	1	1	1	1	1	1	1	1	1	5	1	1	1	5	1	1	1	1	1		1	1	1	1	1	1	5	1	5	1	1	1	1	1
229		1996		S	1	1		1	1	1	1	1	1	1	1	1	1	1	1	1	1	6	1	1	1	1	1	1	5	1	1	1	1	1		5	1	1	1	1	1	1	5	1	1	1	1	1	1
230		1996	11	S	1	1		1	1	1	1	1	1	1	1	1	1	1	1	1	1	5	1	1	1	1	1	1	1	1	1	1	1	1		1	1	1	1	1	1	1	1	1	1	1	1	1	1
231		1996		S	1	1		1	1	1	1	1	1	1	1	1	1	1	1	1	1	1	1	1	1	1	1	1	1	1	1	1	1	1		1	1	1	1	1	1	5	1	1	1	1	1	1	1
232		1996		S	1	1		1	1	1	1	1	1	1	1	1	1	1	1	1	1	1	1	1	1	1	1	1	1	1	1	1	1	1		1	1	1	1	1	1	5	1	1	1	1	1	1	1
233		1996	5	F	1	1		1	1	1	1	1	1	1	1	1	1	1	1	1	1	1	1	1	1	1	1	1	1	1	1	1	1	1		1	1	1	1	1	1	1	1	1	1	1	1	1	1
239		1996		S	1	1		1	1	1	1	1	1	1	1	1	1	1	1	1	1	1	1	1	1	1	1	1	1	1	1	1	1	1		1	1	1	1	1	1	5	1	5	1	1	1	1	1
247		1996	6	S	1	1		1	1	1	1	1	1	1	1	1	1	1	1	1	1	1	1	1	1	1	1	1	1	1	1	1	1	1		6	1	1	1	1	1	5	1	1	1	1	1	1	1
252		1996	11	S	1	1		1	1	1	1	1	1	1	1	1	1	1	1	1	1	1	1	1	1	1	1	1	1	1	1	1	1	1		1	1	1	1	1	1	1	1	1	1	1	1	1	1
260		1996		S	1	1		1	1	1	1	1	1	1	1	1	1	1	1	1	1	1	1	1	1	1	1	1	1	1	1	1	1	1		1	1	1	1	1	1	1	1	1	1	1	1	1	1
262		1996	4	M	1	1		1	1	1	1	1	1	1	1	1	1	1	1	1	1	1	1	1	1	1	1	1	5	1	1	1	1	1		1	1	1	1	1	1	1	1	1	1	1	1	1	1
265		1996	11	M	1	1		1	1	1	1	1	1	1	1	1	1	1	1	1	1	1	1	1	1	1	1	1	1	1	1	1	1	1		1	1	1	1	1	1	1	1	1	1	1	1	1	1
267		1996	5	M	1	1		1	1	1	1	1	1	1	1	1	1	1	1	1	1	1	1	1	1	1	1	1	1	1	1	1	1	1		1	1	1	1	1	1	5	1	1	1	1	1	1	1
272		1996	12	F	1	1		1	1	1	1	1	1	1	1	1	1	1	1	1	1	1	1	1	1	1	1	1	5	1	1	1	1	1		1	1	1	1	1	1	1	1	1	1	1	1	1	1
273		1996	11	M	1	1		1	1	1	1	1	1	1	1	1	1	1	1	1	1	1	1	1	5	5	1	1	5	1	1	1	1	1	Parecchie B. hominis	1	1	1	1	1	1	5	1	1	1	1	1	1	1
285		1996	14	F	1	1		1	1	1	1	1	1	1	1	1	1	1	1	1	1	1	1	1	5	1	1	1	1	1	1	1	1	1		1	1	1	1	1	1	4	1	4	1	1	1	1	1
286		1996	14	S	1	1		1	1	1	1	1	1	1	1	1	1	1	1	1	1	1	1	1	1	1	1	1	1	1	1	1	1	1		1	1	1	1	1	1	7	2	1	1	1	1	1	1
287		1996	13	F	1	1		1	1	1	1	1	1	1	1	1	1	1	1	1	1	1	1	1	5	1	1	1	1	1	1	1	1	1		1	1	1	1	1	1	4	1	3	1	1	1	1	1
288		1996	7	F	1	1		1	1	1	1	1	1	1	1	1	1	1	1	1	1	1	1	1	1	1	1	1	1	1	1	1	1	1		1	1	1	1	1	1	5	1	4	1	1	1	1	1
289		1996	6	F	1	1		1	1	1	1	1	1	1	1	1	1	1	1	1	1	1	1	1	1	1	1	1	1	1	1	1	1	1		1	1	1	1	1	1	6	3	1	1	1	1	1	1
290		1996	14	S	1	1		1	1	1	1	1	1	1	1	1	1	1	1	1	1	1	1	1	1	1	1	1	1	1	1	1	1	1		1	1	1	1	1	1	4	1	1	1	1	1	1	1
292		1996	12	F	1	1		1	1	1	1	1	1	1	1	1	1	1	1	1	1	1	1	1	1	1	1	1	1	1	1	1	1	1		1	1	1	1	1	1	7	4	4	1	1	1	1	1
293		1996	7	S	1	1		1	1	1	1	1	1	1	1	1	1	1	1	1	1	1	1	1	1	1	1	1	1	1	1	1	1	1		1	1	1	1	1	1	3	1	1	1	1	1	1	1
294		1996	11	S	1	1		1	1	1	1	1	1	1	1	1	1	1	1	1	1	1	1	1	6	1	5	1	1	1	1	1	1	1		1	1	1	1	1	1	6	1	1	1	1	1	1	1
296		1996	8	F	1	1		1	1	1	1	1	1	1	1	1	1	1	1	1	1	1	1	1	6	1	6	1	1	1	1	1	1	1		1	1	1	1	1	1	7	1	3	1	1	1	1	1
297		1996	6	S	1	1		1	1	1	1	1	1	1	1	1	1	1	1	1	1	1	1	1	1	1	1	1	1	1	1	1	1	1		1	1	1	1	1	1	7	2	2	1	1	1	1	1
298		1996	8	M	1	1		1	1	1	1	1	1	1	1	1	1	1	1	1	1	1	1	1	1	1	1	1	1	1	1	1	1	1		5	1	1	1	1	1	1	1	1	1	1	1	1	1
299		1996	15	M	1	1		1	1	1	1	1	1	1	1	1	1	1	1	1	1	1	1	1	1	1	1	1	6	1	1	1	1	1		1	1	1	1	1	1	6	2	1	1	1	1	1	1
300		1996	7	M	1	1		1	1	1	1	1	1	1	1	1	1	1	1	1	1	1	1	1	5	5	1	1	5	1	1	1	1	1		1	1	1	1	1	1	4	1	2	1	1	1	1	1
301		1996	9	M	1	1		1	1	1	1	1	1	1	1	1	1	1	1	1	1	1	1	1	6	1	1	1	1	1	1	1	1	1		1	1	1	1	1	1	6	5	5	1	1	1	1	1
302		1996	6	F	1	1		1	1	1	1	1	1	1	1	1	1	1	1	1	1	1	1	1	1	1	1	1	1	1	1	1	1	1		1	1	1	1	1	1	4	3	3	1	1	1	1	1
303		1996	10	M	1	1		1	1	1	1	1	1	1	1	1	1	1	1	1	1	1	1	1	1	1	1	1	1	1	1	1	1	1		1	1	1	1	1	1	3	3	1	1	1	1	1	1
304		1996	11	M	1	1		1	1	1	1	1	1	1	1	1	1	1	1	1	1	1	1	1	1	1	1	1	1	1	1	1	1	1		1	1	1	1	1	1	7	2	1	1	1	1	1	1
305		1996	8	M	1	1		1	1	1	1	1	1	1	1	1	1	1	1	1	1	1	1	1	1	1	1	1	1	1	1	1	1	1		1	1	1	1	1	1	7	1	1	1	1	1	1	1
306		1996	6	S	1	1		1	1	1	1	1	1	1	1	1	1	1	1	1	1	1	1	1	1	1	1	1	1	1	1	1	1	1		1	1	1	1	1	1	8	1	1	1	1	1	1	1
307		1996	6	M	1	1		1	1	1	1	1	1	1	1	1	1	1	1	1	1	1	1	1	6	1	1	1	1	1	1	1	1	1		1	1	1	1	1	1	1	2	4	1	1	1	1	1
309		1996	17	F	1	1		1	1	1	1	1	1	1	1	1	1	1	1	1	1	1	1	1	1	1	1	1	5	1	1	1	1	1		1	1	1	1	1	1	4	3	1	1	1	1	1	1
310		1996	14	M	1	1		1	1	1	1	1	1	1	1	1	1	1	1	1	1	1	1	1	1	1	1	1	1	1	1	1	1	1		1	1	1	1	1	1	7	3	3	1	1	1	1	1
312		1996	6	M	1	1		1	1	1	1	1	1	1	1	1	1	1	1	1	1	1	1	1	6	1	5	1	6	1	1	1	1	1		1	1	1	1	1	1	7	2	1	1	1	1	1	1
313		1996	5	M	1	1		1	1	1	1	1	1	1	1	1	1	1	1	1	1	1	1	1	1	1	1	1	1	1	1	1	1	1		1	1	1	1	1	1	8	4	2	1	1	1	1	1
315		1996	12	M	1	1		1	1	1	1	1	1	1	1	1	1	1	1	1	1	1	1	1	1	1	1	1	1	1	1	1	1	1		1	1	1	1	1	1	1	1	1	1	1	1	1	1
324		1996	5	M	1	1		1	1	1	1	1	1	1	1	1	1	1	1	1	1	1	1	1	1	1	1	1	1	1	1	1	1	1		1	1	1	1	1	1	7	2	2	1	1	1	1	1
325		1996	6	S	1	1		1	1	1	1	1	1	1	1	1	1	1	1	1	1	1	1	1	5	1	1	1	1	1	1	1	1	1		1	1	1	1	1	1	7	1	4	1	1	1	1	1
328		1996	17	S	1	1		1	1	1	1	1	1	1	1	1	1	1	1	1	1	1	1	1	1	1	1	1	1	1	1	1	1	1		1	1	1	1	1	1	6	1	1	1	1	1	1	1
329		1996	14	S	1	1		1	1	1	1	1	1	1	1	1	1	1	1	1	1	1	1	1	1	1	1	1	1	1	1	1	1	1		1	1	1	1	1	1	6	1	3	1	1	1	1	1
333		1996	13	S	1	1		1	1	1	1	1	1	1	1	1	1	1	1	1	1	1	1	1	1	1	1	1	1	1	1	1	1	1		1	1	1	1	1	1	1	1	1	1	7	1	1	1
338		1996	15	F	1	1		1	1	1	1	1	1	1	1	1	1	1	1	1	1	1	1	1	2	1	1	1	1	1	1	1	1	1		1	1	1	1	1	1	5	1	1	1	1	1	1	1
342		1996	14	F	1	1		1	1	1	1	1	1	1	1	1	1	1	1	1	1	1	1	1	6	1	1	1	5	1	1	1	1	1		1	1	1	1	1	1	6	5	5	1	1	1	1	1
346		1996	13	M	1	1		1	1	1	1	1	1	1	1	1	1	1	1	1	1	1	1	1	1	1	1	1	1	1	1	1	1	1		1	1	1	1	1	1	4	3	2	1	1	1	1	1
347		1996	10	F	1	1		1	1	1	1	1	1	1	1	1	1	1	1	1	1	1	1	1	1	1	1	1	1	1	1	1	1	1		1	1	1	1	1	1	6	1	1	1	1	1	1	1
348		1996	9	M	1	1		1	1	1	1	1	1	1	1	1	1	1	1	1	1	1	1	1	1	1	6	1	1	1	1	1	1	1		1	1	5	1	1	1	6	2	3	1	1	1	1	1
349		1996	8	F	1	1		1	1	1	1	1	1	1	1	1	1	1	1	1	1	1	1	1	1	1	1	1	1	1	1	1	1	1		1	1	1	1	1	1	1	1	3	1	1	1	1	1
350		1996	9	M	1	1		1	1	1	1	1	1	1	1	1	1	1	1	1	1	1	1	1	1	1	1	1	1	1	1	1	1	1		1	1	1	1	1	1	6	4	4	1	1	1	1	1
351		1996	15	F	1	1		1	1	1	1	1	1	1	1	1	1	1	1	1	1	1	1	1	1	1	1	1	1	1	1	1	1	1		6	1	1	1	1	1	1	1	1	1	1	1	1	1
352		1996	8	F	1	1		1	1	1	1	1	1	1	1	1	1	1	1	1	1	1	1	1	1	1	5	1	6	1	1	1	1	1		1	1	1	1	1	1	4	1	1	1	1	1	1	1
356		1996	8	M	1	1		1	1	1	1	1	1	1	1	1	1	1	1	1	1	1	1	1	5	1	1	1	1	1	1	1	1	1	Cisti indiagnosticabili	1	1	1	1	1	1	5	1	1	1	1	1	1	1
357		1996	12	M	1	1		1	1	1	1	1	1	1	1	1	1	1	1	1	1	1	1	1	1	1	1	1	1	1	1	1	1	1		1	1	1	1	1	1	6	3	3	1	1	1	1	1
358		1996	13	M	1	1		1	1	1	1	1	1	1	1	1	1	1	1	1	1	1	1	1	4	1	1	1	1	1	1	1	1	1		3	1	1	1	1	1	5	1	3	1	1	1	1	1
360		1996	7	F	1	1		1	1	1	1	1	1	1	1	1	1	1	1	1	1	1	1	1	1	1	1	1	1	1	1	1	1	1		1	1	1	1	1	1	4	8	1	1	1	1	1	1
361		1996	10	M	1	1		1	1	1	1	1	1	1	1	1	1	1	1	1	1	1	1	1	5	1	1	1	1	1	1	1	1	1		1	1	1	1	1	1	4	1	1	1	1	1	1	1
362		1996	8	M	1	1		1	1	1	1	1	1	1	1	1	1	1	1	1	1	1	1	1	1	1	1	1	1	1	1	1	1	1		1	1	1	1	1	1	3	4	4	1	1	1	1	1
365		1996	6	M	1	1		1	1	1	1	1	1	1	1	1	1	1	1	1	1	1	1	1	1	1	1	1	1	1	1	1	1	1		1	1	1	1	1	1	1	1	1	1	1	1	1	1
366		1996	5	F	1	1		1	1	1	1	1	1	1	1	1	1	1	1	1	1	1	1	1	5	1	1	1	1	1	1	1	1	1		1	1	1	1	1	1	1	1	1	1	1	1	1	1
368		1996	15	M	1	1		1	1	1	1	1	1	1	1	1	1	1	1	1	1	1	1	1	1	1	1	1	1	1	1	1	1	1		1	1	1	1	1	1	4	1	2	1	1	1	1	1
379		1996	12	M	1	1		1	1	1	1	1	1	1	1	1	1	1	1	1	1	1	1	1	1	1	1	1	1	1	1	1	1	1		1	1	1	1	1	1	6	5	1	1	1	1	1	1
385		1996	11	M	1	1		1	1	1	1	1	1	1	1	1	1	1	1	1	1	1	1	1	6	6	1	1	1	1	1	1	1	1		1	1	1	1	1	1	6	2	4	1	1	1	1	1
386		1996	11	M	1	1		1	1	1	1	1	1	1	1	1	1	1	1	1	1	1	1	1	5	5	1	1	1	1	1	1	1	1	Cisti indiagnosticabili	1	1	1	1	1	1	5	3	3	1	1	1	1	1
388		1996	11	M	1	1		1	1	1	1	1	1	1	1	1	1	1	1	1	1	1	1	1	1	1	1	1	1	1	1	1	1	1		1	1	1	1	1	1	1	1	1	1	1	1	1	1
390		1996	8	M	1	1		1	1	1	1	1	1	1	1	1	1	1	1	1	1	1	1	1	1	1	1	1	1	1	1	1	1	1		1	1	1	1	1	1	6	1	3	1	1	1	1	1
391		1996	8	M	1	1		1	1	1	1	1	1	1	1	1	1	1	1	1	1	1	1	1	5	1	1	1	1	1	1	1	1	1		1	1	1	1	1	1	1	1	2	1	1	1	1	1
392		1996	13	M	1	1		1	1	1	1	1	1	1	1	1	1	1	1	1	1	1	1	1	5	1	5	1	5	1	1	1	1	1		1	1	1	1	1	1	6	3	3	1	1	1	1	1
393		1996	10	M	1	1		1	1	1	1	1	1	1	1	1	1	1	1	1	1	1	1	1	1	1	1	1	1	1	1	1	1	1		1	1	1	1	1	1	4	1	1	1	1	1	1	1
394		1996	14	F	1	1		1	1	1	1	1	1	1	1	1	1	1	1	1	1	1	1	1	6	1	1	1	1	1	1	1	1	1		1	1	1	1	1	1	5	1	1	1	1	1	1	1
395		1996	8	M	1	1		1	1	1	1	1	1	1	1	1	1	1	1	1	1	1	1	1	1	1	1	1	1	1	1	1	1	1		1	1	1	1	1	1	6	1	1	1	1	1	1	1
396		1996	12	F	1	1		1	1	1	1	1	1	1	1	1	1	1	1	1	1	1	1	1	5	1	1	1	1	1	1	1	1	1		1	1	1	1	1	1	6	1	1	1	1	1	1	1
398		1996	10	F	1	1		1	1	1	1	1	1	1	1	1	1	1	1	1	1	1	1	1	1	1	1	1	1	1	1	1	1	1		1	1	1	1	1	1	1	1	1	1	1	1	1	1
404		1996	9	M	1	1		1	1	1	1	1	1	1	1	1	1	1	1	1	1	1	1	1	1	1	1	1	1	1	1	1	1	1	Barattolo vuoto	1	1	1	1	1	1	1	1	1	1	1	1	1	1
405		1996	8	F	1	1		1	1	1	1	1	1	1	1	1	1	1	1	1	1	1	1	1	1	1	1	1	1	1	1	1	1	1		1	1	1	1	1	1	1	4	4	1	1	1	1	1
406		1996	7	F	1	1		1	1	1	1	1	1	1	1	1	1	1	1	1	1	1	1	1	1	1	1	1	1	1	1	1	1	1		1	1	1	1	1	1	4	2	4	1	1	1	1	1
407		1996	8	M	1	1		1	1	1	1	1	1	1	1	1	1	1	1	1	1	1	1	1	6	1	1	1	1	1	1	1	1	1		1	1	1	1	1	1	4	4	2	1	1	1	1	1
410		1996	6	M	1	1		1	1	1	1	1	1	1	1	1	1	1	1	1	1	1	1	1	1	1	1	1	1	1	1	1	1	1		1	1	1	1	1	1	4	1	1	1	1	1	1	1
414		1996	13	M	1	1		1	1	1	1	1	1	1	1	1	1	1	1	1	1	1	1	1	1	1	1	1	1	1	1	1	1	1		1	1	1	1	1	1	4	1	1	1	1	1	1	1
415		1996	12	F	1	1		1	1	1	1	1	1	1	1	1	1	1	1	1	1	1	1	1	5	1	1	1	5	1	1	1	1	1		1	1	1	1	1	1	5	1	1	1	1	1	1	1
418		1996	9	M	1	1		1	1	1	1	1	1	1	1	1	1	1	1	1	1	1	1	1	1	1	1	1	1	1	1	1	1	1		1	1	1	1	1	1	1	1	1	1	1	1	1	1
419		1996	9	M	1	1		1	1	1	1	1	1	1	1	1	1	1	1	1	1	1	1	1	1	1	1	1	1	1	1	1	1	1		1	1	1	1	1	1	6	1	1	1	1	1	1	1
420		1996	5	F	1	1		1	1	1	1	1	1	1	1	1	1	1	1	1	1	1	1	1	1	1	1	1	1	1	1	1	1	1		1	1	1	1	1	1	7	1	2	1	1	1	1	1
423		1996	12	M	1	1		1	1	1	1	1	1	1	1	1	1	1	1	1	1	1	1	1	5	1	1	1	1	1	1	1	1	1		1	1	1	1	1	1	1	3	3	1	1	1	1	1
[truncated: 10 more columns]

## Sheet: 1996_Adults
IDContator		Anno	Eta	Genere	EMDNHnana	EMDNHdimin	EMDNAltro	EMDNCGlamb	EMDNTGlamb	EMDNCCmesn	EMDNTCmesn	EMDNIbelli	EMDNShomin	EMDNAlumbr	EMDNTtrich	EMDNAncilo	EMDNSsterc	EMDNCapill	EMDNEvermi	EMDNCBcoli	EMDNTBcoli	EMCNCEhist	EMCNTEhist	EMCNCalter	EMCNCEcoli	EMCNTEcoli	EMCNCEnana	EMCNTEnana	EMCNCIbuts	EMCNTIbuts	EMCNCEhart	EMCNTEhart	EMCNHnana	EMCNHdimin	EMCNAltro	EMCNCGlamb	EMCNTGlamb	EMCNCCmesn	EMCNTCmesn	EMCNIbelli	EMCNShomin	EMCNAlumbr	EMCNTtrich	EMCNAncilo	EMCNSsterc	EMCNCapill	EMCNEvermi	EMCNCBcoli	EMCNTBcoli
222		1996	18	M	1	1		1	1	1	1	1	1	1	1	1	1	1	1	1	1	1	1	1	4	1	1	1	1	1	1	1	1	1		1	1	1	1	1	1	1	1	1	1	1	1	1	1
234		1996	67	S	1	1		1	1	1	1	1	1	1	1	1	1	1	1	1	1	5	1	1	1	1	1	1	1	1	1	1	1	1		1	1	1	1	1	1	5	1	1	1	1	1	1	1
235		1996	28	S	1	1		1	1	1	1	1	1	1	1	1	1	1	1	1	1	1	1	1	1	1	1	1	5	1	1	1	1	1		1	1	1	1	1	1	1	1	1	1	1	1	1	1
236		1996		S	1	1		1	1	1	1	1	1	1	1	1	1	1	1	1	1	1	1	1	1	1	1	1	1	1	1	1	1	1		1	1	1	1	1	1	1	1	1	1	1	1	1	1
237		1996	44	S	1	1		1	1	1	1	1	1	1	1	1	1	1	1	1	1	1	1	1	1	1	1	1	1	1	1	1	1	1		1	1	1	1	1	1	1	1	1	1	1	1	1	1
238		1996	22	S	1	1		1	1	1	1	1	1	1	1	1	1	1	1	1	1	1	1	1	1	1	1	1	1	1	1	1	1	1		1	1	1	1	1	1	1	5	1	1	1	1	1	1
240		1996		S	1	1		1	1	1	1	1	1	1	1	1	1	1	1	1	1	1	1	1	1	1	1	1	1	1	1	1	1	1		1	1	1	1	1	1	1	1	1	1	1	1	1	1
241		1996	98	S	1	1		1	1	1	1	1	1	1	1	1	1	1	1	1	1	1	1	5	6	5	1	1	5	1	1	1	1	1		1	1	1	1	1	1	5	5	5	1	1	1	1	1
242		1996	31	S	1	1		1	1	1	1	1	1	1	1	1	1	1	1	1	1	1	1	1	5	1	1	1	1	1	1	1	1	1		1	1	1	1	1	1	5	1	1	1	1	1	1	1
243		1996	26	S	1	1		1	1	1	1	1	1	1	1	1	1	1	1	1	1	6	1	1	1	1	1	1	1	1	1	1	1	1		1	1	1	1	1	1	1	1	1	1	1	1	1	1
244		1996	50	S	1	1		1	1	1	1	1	1	1	1	1	1	1	1	1	1	1	1	1	5	1	1	1	1	1	1	1	1	1		1	1	5	1	1	1	4	1	1	1	1	1	1	1
245		1996		S	1	1		1	1	1	1	1	1	1	1	1	1	1	1	1	1	1	1	1	1	1	1	1	1	1	1	1	1	1		5	1	1	1	1	1	5	1	5	1	1	1	1	1
246		1996	60	S	1	1		1	1	1	1	1	1	1	1	1	1	1	1	1	1	6	1	1	1	1	5	1	1	1	1	1	1	1		1	1	1	1	1	1	1	1	5	1	1	1	1	1
248		1996		S	1	1		1	1	1	1	1	1	1	1	1	1	1	1	1	1	1	1	1	1	1	1	1	1	1	1	1	1	1		1	1	1	1	1	1	1	1	5	1	1	1	1	1
249		1996		M	1	1		1	1	1	1	1	1	1	1	1	1	1	1	1	1	1	1	1	1	1	1	1	1	1	1	1	1	1		1	1	1	1	1	1	1	1	5	1	1	1	1	1
250		1996	48	S	1	1		1	1	1	1	1	1	1	1	1	1	1	1	1	1	1	1	1	6	1	1	1	1	1	1	1	1	1		1	1	1	1	1	1	5	1	1	1	1	1	1	1
251		1996	67	S	1	1		1	1	1	1	1	1	1	1	1	1	1	1	1	1	1	1	1	1	1	1	1	1	1	1	1	1	1		1	1	1	1	1	1	1	1	1	1	1	1	1	1
253		1996		S	1	1		1	1	1	1	1	1	1	1	1	1	1	1	1	1	6	6	1	1	1	1	1	1	1	1	1	1	1		1	1	1	1	1	1	1	1	1	1	1	1	1	1
254		1996		S	1	1		1	1	1	1	1	1	1	1	1	1	1	1	1	1	1	1	1	5	1	1	1	1	1	1	1	1	1		5	1	1	1	1	1	1	1	1	1	1	1	1	1
255		1996	70	S	1	1		1	1	1	1	1	1	1	1	1	1	1	1	1	1	5	1	1	6	1	1	1	1	1	1	1	1	1		1	1	1	1	1	1	1	1	1	1	1	1	1	1
256		1996	52	S	1	1		1	1	1	1	1	1	1	1	1	1	1	1	1	1	1	1	1	1	1	1	1	1	1	1	1	1	1		1	1	1	1	1	1	1	1	1	1	1	1	1	1
257		1996	65	S	1	1		1	1	1	1	1	1	1	1	1	1	1	1	1	1	1	1	1	5	1	1	1	1	1	1	1	1	1		1	1	1	1	1	1	1	1	5	1	1	1	1	1
258		1996	41	S	1	1		1	1	1	1	1	1	1	1	1	1	1	1	1	1	1	1	1	6	1	1	1	1	1	1	1	1	1		1	1	1	1	1	1	1	1	1	1	1	1	1	1
259		1996		S	1	1		1	1	1	1	1	1	1	1	1	1	1	1	1	1	1	1	1	1	1	1	1	1	1	1	1	1	1		1	1	1	1	1	1	1	1	1	1	1	1	1	1
261		1996	23	S	1	1		1	1	1	1	1	1	1	1	1	1	1	1	1	1	1	1	1	5	1	1	1	1	1	1	1	1	1		1	1	1	1	1	1	1	1	1	1	1	1	1	1
263		1996	36	M	1	1		1	1	1	1	1	1	1	1	1	1	1	1	1	1	5	1	1	6	1	1	1	1	1	1	1	1	1		1	1	6	1	1	1	1	1	5	1	1	1	1	1
264		1996	59	M	1	1		1	1	1	1	1	1	1	1	1	1	1	1	1	1	1	1	1	6	1	1	1	1	1	1	1	1	1		1	1	1	1	1	1	5	1	1	1	1	1	1	1
266		1996	23	M	1	1		1	1	1	1	1	1	1	1	1	1	1	1	1	1	1	1	1	1	1	1	1	1	1	1	1	1	1		1	1	1	1	1	1	1	1	1	1	1	1	1	1
268		1996	29	M	1	1		1	1	1	1	1	1	1	1	1	1	1	1	1	1	1	1	1	5	1	1	1	5	1	1	1	1	1	Cisti molto alterate indiagnosticabili	1	1	1	1	1	1	5	1	4	1	1	1	1	1
269		1996	29	F	1	1		1	1	1	1	1	1	1	1	1	1	1	1	1	1	1	1	1	1	1	1	1	5	1	1	1	1	1	Cisti indiagnosticabili	1	1	1	1	1	1	1	1	5	1	1	1	1	1
270		1996	29	M	1	1		1	1	1	1	1	1	1	1	1	1	1	1	1	1	1	1	1	5	5	1	1	5	1	1	1	1	1		1	1	1	1	1	1	1	1	1	1	1	1	1	1
271		1996	54	F	1	1		1	1	1	1	1	1	1	1	1	1	1	1	1	1	1	1	1	1	1	1	1	1	1	1	1	1	1		1	1	1	1	1	1	1	1	1	1	1	1	1	1
274		1996	34	F	1	1		1	1	1	1	1	1	1	1	1	1	1	1	1	1	1	1	1	5	1	1	1	1	1	1	1	1	1		1	1	1	1	1	1	1	1	1	1	1	1	1	1
275		1996	50	M	1	1		1	1	1	1	1	1	1	1	1	1	1	1	1	1	5	1	1	1	1	1	1	1	1	1	1	1	1		1	1	1	1	1	1	1	1	1	1	1	1	1	1
276		1996		F	1	1		1	1	1	1	1	1	1	1	1	1	1	1	1	1	5	1	1	1	1	1	1	5	1	1	1	1	1		1	1	1	1	1	1	5	1	1	1	1	1	1	1
277		1996	88	F	1	1		1	1	1	1	1	1	1	1	1	1	1	1	1	1	1	1	1	1	1	1	1	1	1	1	1	1	1		1	1	1	1	1	1	5	1	1	1	1	1	1	1
278		1996	60	M	1	1		1	1	1	1	1	1	1	1	1	1	1	1	1	1	1	1	1	1	1	1	1	1	1	1	1	1	1		1	1	1	1	1	1	5	1	1	1	1	1	1	1
279		1996		M	1	1		1	1	1	1	1	1	1	1	1	1	1	1	1	1	4	1	1	1	1	1	1	1	1	1	1	1	1		1	1	1	1	1	1	6	5	1	1	1	1	1	1
280		1996	64	F	1	1		1	1	1	1	1	1	1	1	1	1	1	1	1	1	1	1	1	1	1	1	1	1	1	1	1	1	1		1	1	1	1	1	1	5	1	1	1	1	1	1	1
281		1996	79	M	1	1		1	1	1	1	1	1	1	1	1	1	1	1	1	1	1	1	1	5	1	1	1	5	1	1	1	1	1		1	1	1	1	1	1	6	5	1	1	1	1	1	1
282		1996		F	1	1		1	1	1	1	1	1	1	1	1	1	1	1	1	1	1	1	1	1	1	1	1	1	1	1	1	1	1		1	1	1	1	1	1	6	1	1	1	1	1	1	1
283		1996	81	F	1	1		1	1	1	1	1	1	1	1	1	1	1	1	1	1	5	1	1	6	1	1	1	1	1	1	1	1	1		1	1	1	1	1	1	5	1	1	1	1	1	1	1
284		1996	70	F	1	1		1	1	1	1	1	1	1	1	1	1	1	1	1	1	1	1	1	5	1	6	1	1	1	1	1	1	1		1	1	1	1	1	1	4	1	1	1	1	1	1	1
291		1996		S	1	1		1	1	1	1	1	1	1	1	1	1	1	1	1	1	1	1	1	1	1	5	1	1	1	1	1	1	1		1	1	1	1	1	1	6	2	1	1	1	1	1	1
295		1996	33	M	1	1		1	1	1	1	1	1	1	1	1	1	1	1	1	1	1	1	1	6	1	5	1	5	1	1	1	1	1		1	1	1	1	1	1	4	3	2	1	1	1	1	1
308		1996	51	S	1	1		1	1	1	1	1	1	1	1	1	1	1	1	1	1	1	1	1	1	1	1	1	5	1	1	1	1	1		1	1	1	1	1	1	4	2	1	1	1	1	1	1
311		1996	48	F	1	1		1	1	1	1	1	1	1	1	1	1	1	1	1	1	1	1	1	1	1	1	1	1	1	1	1	1	1		1	1	1	1	1	1	6	1	1	1	1	1	1	1
314		1996	43	M	1	1		1	1	1	1	1	1	1	1	1	1	1	1	1	1	1	1	1	5	1	1	1	6	1	1	1	1	1		1	1	1	1	1	1	6	3	1	1	1	1	1	1
316		1996	32	F	1	1		1	1	1	1	1	1	1	1	1	1	1	1	1	1	1	1	1	1	1	1	1	1	1	1	1	1	1		1	1	1	1	1	1	1	1	1	1	1	1	1	1
317		1996	32	F	1	1		1	1	1	1	1	1	1	1	1	1	1	1	1	1	1	1	1	1	1	1	1	1	1	1	1	1	1		1	1	1	1	1	1	1	1	1	1	1	1	1	1
318		1996		S	1	1		1	1	1	1	1	1	1	1	1	1	1	1	1	1	1	1	1	5	1	1	1	1	1	1	1	1	1		1	1	1	1	1	1	1	1	1	1	1	1	1	1
319		1996	57	F	1	1		1	1	1	1	1	1	1	1	1	1	1	1	1	1	1	1	1	5	5	1	1	1	1	1	1	1	1		1	1	1	1	1	1	4	1	3	1	1	1	1	1
320		1996	39	F	1	1		1	1	1	1	1	1	1	1	1	1	1	1	1	1	1	1	1	1	1	1	1	1	1	1	1	1	1		1	1	1	1	1	1	4	3	1	1	1	1	1	1
321		1996	19	M	1	1		1	1	1	1	1	1	1	1	1	1	1	1	1	1	1	1	1	1	1	1	1	1	1	1	1	1	1		1	1	1	1	1	1	4	2	2	1	1	1	1	1
322		1996	43	F	1	1		1	1	1	1	1	1	1	1	1	1	1	1	1	1	1	1	1	1	1	1	1	1	1	1	1	1	1		1	1	1	1	1	1	4	1	1	1	1	1	1	1
323		1996	38	F	1	1		1	1	1	1	1	1	1	1	1	1	1	1	1	1	1	1	1	2	2	1	1	1	1	1	1	1	1		1	1	1	1	1	1	5	2	2	1	1	1	1	1
326		1996	26	S	1	1		1	1	1	1	1	1	1	1	1	1	1	1	1	1	1	1	1	1	1	1	1	1	1	1	1	1	1		1	1	1	1	1	1	7	1	1	1	1	1	1	1
327		1996	57	S	1	1		1	1	1	1	1	1	1	1	1	1	1	1	1	1	1	1	1	1	1	1	1	1	1	1	1	1	1	Cisti molto alterate	1	1	1	1	1	1	4	1	1	1	1	1	1	1
330		1996	43	S	1	1		1	1	1	1	1	1	1	1	1	1	1	1	1	1	1	1	1	5	1	1	1	1	1	1	1	1	1		1	1	1	1	1	1	4	4	2	1	5	1	1	1
331		1996	39	S	1	1		1	1	1	1	1	1	1	1	1	1	1	1	1	1	1	1	1	6	6	1	1	5	1	1	1	1	1	Cisti alterate	1	1	1	1	1	1	5	1	5	1	4	1	1	1
332		1996	38	S	1	1		1	1	1	1	1	1	1	1	1	1	1	1	1	1	1	1	1	5	1	5	1	5	1	1	1	1	1		1	1	1	1	1	1	5	1	1	1	5	1	1	1
334		1996	50	M	1	1		1	1	1	1	1	1	1	1	1	1	1	1	1	1	1	1	1	5	1	1	1	6	1	1	1	1	1	Alcune cisti indiagnosticabili	1	1	1	1	1	1	1	1	1	1	1	1	1	1
335		1996	48	M	1	1		1	1	1	1	1	1	1	1	1	1	1	1	1	1	1	1	1	1	1	1	1	1	1	1	1	1	1		1	1	1	1	1	1	1	1	5	1	1	1	1	1
336		1996	39	M	1	1		1	1	1	1	1	1	1	1	1	1	1	1	1	1	1	1	1	1	1	1	1	1	1	1	1	1	1		1	1	1	1	1	1	6	1	5	1	1	1	1	1
337		1996	46	M	1	1		1	1	1	1	1	1	1	1	1	1	1	1	1	1	7	5	1	1	1	1	1	5	1	1	1	1	1		1	1	1	1	1	1	1	1	1	1	1	1	1	1
339		1996	42	F	1	1		1	1	1	1	1	1	1	1	1	1	1	1	1	1	1	1	1	5	1	1	1	1	1	1	1	1	1		1	1	1	1	1	1	1	1	1	1	1	1	1	1
340		1996	44	M	1	1		1	1	1	1	1	1	1	1	1	1	1	1	1	1	1	1	1	1	1	1	1	1	1	1	1	1	1	Cisti molto alterate	1	1	1	1	1	1	5	1	1	1	1	1	1	1
341		1996	19	F	1	1		1	1	1	1	1	1	1	1	1	1	1	1	1	1	1	1	1	5	1	1	1	1	1	1	1	1	1		1	1	1	1	1	1	6	1	5	1	1	1	1	1
343		1996	29	F	1	1		1	1	1	1	1	1	1	1	1	1	1	1	1	1	1	1	1	1	1	1	1	1	1	1	1	1	1		1	1	1	1	1	1	1	1	1	1	1	1	1	1
344		1996	39	M	1	1		1	1	1	1	1	1	1	1	1	1	1	1	1	1	1	1	1	1	1	1	1	1	1	1	1	1	1		1	1	1	1	1	1	6	3	4	1	1	1	1	1
345		1996	53	F	1	1		1	1	1	1	1	1	1	1	1	1	1	1	1	1	1	1	1	5	1	1	1	1	1	1	1	1	1		1	1	1	1	1	1	4	1	1	1	1	1	1	1
353		1996	60	F	1	1		1	1	1	1	1	1	1	1	1	1	1	1	1	1	1	1	1	1	1	1	1	5	1	1	1	1	1		1	1	1	1	1	1	6	1	1	1	1	1	1	1
354		1996	51	F	1	1		1	1	1	1	1	1	1	1	1	1	1	1	1	1	1	1	1	1	1	1	1	1	1	1	1	1	1		1	1	1	1	1	1	6	3	1	1	1	1	1	1
355		1996	59	M	1	1		1	1	1	1	1	1	1	1	1	1	1	1	1	1	1	1	1	1	6	1	1	2	1	1	1	1	1		1	1	1	1	1	1	5	2	1	1	1	1	1	1
359		1996	22	F	1	1		1	1	1	1	1	1	1	1	1	1	1	1	1	1	1	1	1	5	1	1	1	1	1	1	1	1	1		1	1	1	1	1	1	1	1	1	1	1	1	1	1
363		1996	32	M	1	1		1	1	1	1	1	1	1	1	1	1	1	1	1	1	1	1	1	1	1	1	1	1	1	1	1	1	1	Cisti alterate	1	1	1	1	1	1	1	1	1	1	1	1	1	1
364		1996	32	F	1	1		1	1	1	1	1	1	1	1	1	1	1	1	1	1	1	1	1	1	1	1	1	1	1	1	1	1	1		1	1	1	1	1	1	4	1	1	1	1	1	1	1
367		1996	35	F	1	1		1	1	1	1	1	1	1	1	1	1	1	1	1	1	1	1	1	5	1	1	1	1	1	1	1	1	1		1	1	1	1	1	1	6	3	3	1	1	1	1	1
369		1996	48	M	1	1		1	1	1	1	1	1	1	1	1	1	1	1	1	1	1	1	1	5	5	1	1	5	1	1	1	1	1		1	1	1	1	1	1	4	1	2	1	1	1	1	1
370		1996	53	M	1	1		1	1	1	1	1	1	1	1	1	1	1	1	1	1	1	1	1	6	1	1	1	1	1	1	1	1	1		1	1	1	1	1	1	4	2	1	1	1	1	1	1
371		1996	39	F	1	1		1	1	1	1	1	1	1	1	1	1	1	1	1	1	1	1	1	1	1	1	1	1	1	1	1	1	1		1	1	1	1	1	1	6	1	1	1	1	1	1	1
372		1996	50	M	1	1		1	1	1	1	1	1	1	1	1	1	1	1	1	1	1	1	1	6	1	1	1	1	1	1	1	1	1		1	1	1	1	1	1	4	1	1	1	1	1	1	1
373		1996	58	F	1	1		1	1	1	1	1	1	1	1	1	1	1	1	1	1	1	1	1	1	1	1	1	1	1	1	1	1	1		1	1	1	1	1	1	1	1	1	1	1	1	1	1
374		1996	34	F	1	1		1	1	1	1	1	1	1	1	1	1	1	1	1	1	1	1	1	1	1	1	1	1	1	1	1	1	1		1	1	1	1	1	1	5	1	3	1	1	1	1	1
375		1996	42	F	1	1		1	1	1	1	1	1	1	1	1	1	1	1	1	1	1	1	1	1	1	1	1	1	1	1	1	1	1		1	1	1	1	1	1	1	1	1	1	1	1	1	1
376		1996	18	M	1	1		1	1	1	1	1	1	1	1	1	1	1	1	1	1	1	1	1	1	1	1	1	1	1	1	1	1	1		1	1	1	1	1	1	5	1	1	1	1	1	1	1
377		1996	70	M	1	1		1	1	1	1	1	1	1	1	1	1	1	1	1	1	1	1	5	6	1	1	1	1	1	1	1	1	1		1	1	1	1	1	1	1	5	1	1	1	1	1	1
378		1996	41	F	1	1		1	1	1	1	1	1	1	1	1	1	1	1	1	1	1	1	1	6	1	1	1	5	1	1	1	1	5	Cisti indiagnosticabili	1	1	1	1	1	1	1	5	1	1	1	1	1	1
380		1996	50	M	1	1		1	1	1	1	1	1	1	1	1	1	1	1	1	1	1	1	1	1	1	1	1	1	1	1	1	1	1		1	1	1	1	1	1	1	3	1	1	1	1	1	1
381		1996	37	F	1	1		1	1	1	1	1	1	1	1	1	1	1	1	1	1	1	1	1	1	1	1	1	1	1	1	1	1	3		1	1	1	1	1	1	5	1	1	1	1	1	1	1
382		1996	44	F	1	1		1	1	1	1	1	1	1	1	1	1	1	1	1	1	1	1	1	5	1	1	1	1	1	1	1	1	1		1	1	1	1	1	1	4	6	1	1	1	1	1	1
383		1996	28	F	1	1		1	1	1	1	1	1	1	1	1	1	1	1	1	1	5	1	1	6	1	5	1	1	1	1	1	1	1		1	1	1	1	1	1	4	1	1	1	1	1	1	1
384		1996	48	F	1	1		1	1	1	1	1	1	1	1	1	1	1	1	1	1	1	1	1	1	1	1	1	1	1	1	1	1	1		1	1	1	1	1	1	5	3	3	1	1	1	1	1
387		1996	44	M	1	1		1	1	1	1	1	1	1	1	1	1	1	1	1	1	1	1	1	1	1	1	1	1	1	1	1	1	1	Cisti indiagnosticabili	1	1	1	1	1	1	5	1	3	1	1	1	1	1
389		1996	32	F	1	1		1	1	1	1	1	1	1	1	1	1	1	1	1	1	1	1	1	1	1	1	1	1	1	1	1	1	1		1	1	1	1	1	1	1	1	1	1	1	1	1	1
397		1996	38	F	1	1		1	1	1	1	1	1	1	1	1	1	1	1	1	1	1	1	1	5	1	1	1	1	1	1	1	1	1	Cisti alterate	1	1	1	1	1	1	5	1	1	1	1	1	1	1
399		1996	20	F	1	1		1	1	1	1	1	1	1	1	1	1	1	1	1	1	1	1	1	5	1	1	1	1	1	1	1	1	1		1	1	1	1	1	1	4	1	1	1	1	1	1	1
400		1996	26	F	1	1		1	1	1	1	1	1	1	1	1	1	1	1	1	1	5	1	1	5	1	1	1	5	1	1	1	1	1		1	1	1	1	1	1	5	1	1	1	1	1	1	1
401		1996	48	F	1	1		1	1	1	1	1	1	1	1	1	1	1	1	1	1	1	1	1	6	1	1	1	1	1	1	1	1	1		1	1	1	1	1	1	4	1	1	1	1	1	1	1
402		1996	43	F	1	1		1	1	1	1	1	1	1	1	1	1	1	1	1	1	1	1	1	1	1	1	1	1	1	1	1	1	1		1	1	1	1	1	1	4	1	3	1	1	1	1	1
403		1996	36	F	1	1		1	1	1	1	1	1	1	1	1	1	1	1	1	1	1	1	1	1	1	1	1	1	1	1	1	1	1		1	1	1	1	1	1	6	1	4	1	1	1	1	1
408		1996	38	M	1	1		1	1	1	1	1	1	1	1	1	1	1	1	1	1	1	1	1	1	1	1	1	1	1	1	1	1	1		1	1	1	1	1	1	4	1	4	1	1	1	1	1
409		1996	39	M	1	1		1	1	1	1	1	1	1	1	1	1	1	1	1	1	1	1	1	1	1	1	1	5	1	1	1	1	1		1	1	1	1	1	1	5	1	4	1	1	1	1	1
411		1996	20	M	1	1		1	1	1	1	1	1	1	1	1	1	1	1	1	1	1	1	1	1	1	1	1	1	1	1	1	1	1		1	1	1	1	1	1	4	1	2	1	1	1	1	1
412		1996	42	M	1	1		1	1	1	1	1	1	1	1	1	1	1	1	1	1	1	1	1	5	1	1	1	1	1	1	1	1	1		1	1	1	1	1	1	3	3	1	1	1	1	1	1
413		1996	27	M	1	1		1	1	1	1	1	1	1	1	1	1	1	1	1	1	1	1	1	5	1	1	1	1	1	1	1	1	1	Cisti molto alterate	1	1	1	1	1	1	4	1	2	1	1	1	1	1
416		1996	65	F	1	1		1	1	1	1	1	1	1	1	1	1	1	1	1	1	1	1	1	1	1	1	1	1	1	1	1	1	1		1	1	1	1	1	1	5	1	1	1	1	1	1	1
417		1996	40	F	1	1		1	1	1	1	1	1	1	1	1	1	1	1	1	1	1	1	1	6	1	1	1	5	1	1	1	1	1		1	1	1	1	1	1	4	1	1	1	1	1	1	1
421		1996	38	F	1	1		1	1	1	1	1	1	1	1	1	1	1	1	1	1	1	1	1	6	5	1	1	1	1	1	1	1	1		1	1	1	1	1	1	4	1	1	1	1	1	1	1
422		1996	40	F	1	1		1	1	1	1	1	1	1	1	1	1	1	1	1	1	1	1	1	6	1	1	1	1	1	1	1	1	1		1	1	1	1	1	1	1	1	1	1	1	1	1	1
424		1996	38	F	1	1		1	1	1	1	1	1	1	1	1	1	1	1	1	1	1	1	1	6	1	1	1	1	1	1	1	1	1		1	1	1	1	1	1	6	3	1	1	1	1	1	1
425		1996	68	M	1	1		1	1	1	1	1	1	1	1	1	1	1	1	1	1	1	1	1	5	1	5	1	1	1	1	1	1	1	Cisti alterate indiagnosticabili	1	1	1	1	1	1	1	1	1	1	1	1	1	1
[truncated: 2 more columns]

## Sheet: 1990_Adults
IDContatore	ANNO	EMDCEhisto_dispar	EMDCEcoli	EMDCIbutschlii	EMDNAlumbricoides	EMDNTtrichiura	EMDNAncilostomatide	EMDNSstercoralis	EMCNCCmesnili	Comunidad
1	1990	1	1	1	0	0	0	0	0	PLOR
2	1990	1	1	0	0	0	0	0	0	PLOR
3	1990	1	1	0	0	0	0	0	0	PLOR
4	1990	1	0	0	0	0	1	0	0	PLOR
5	1990	1	0	0	0	0	0	0	0	PLOR
6	1990	0	0	0	1	0	0	0	0	PLOR
7	1990	1	1	0	0	0	1	1	0	PLOR
8	1990	0	1	0	1	0	1	0	0	PLOR
9	1990	1	0	0	0	0	0	0	0	PLOR
10	1990	1	1	0	1	1	1	0	0	PLOR
11	1990	1	1	0	1	0	1	1	0	PLOR
12	1990	1	1	0	0	1	0	0	0	PLOR
13	1990	1	1	1	0	0	0	0	0	PLOR
14	1990	1	1	0	0	0	0	0	0	PLOR
15	1990	1	1	0	1	0	0	0	0	PLOR
16	1990	1	0	0	1	0	0	0	0	PLOR
17	1990	1	1	0	1	0	0	0	0	PLOR
18	1990	1	1	0	1	0	0	0	0	PLOR
19	1990	1	1	0	1	0	0	1	0	PLOR
20	1990	0	0	0	0	0	1	0	0	PLOR
21	1990	0	1	0	1	0	1	1	0	PLOR
22	1990	1	1	0	1	0	0	0	0	PLOR
23	1990	1	1	0	0	0	0	0	0	PLOR
25	1990	0	0	0	1	0	0	0	0	PLOR
26	1990	0	1	0	0	0	0	0	0	PLOR
27	1990	1	0	0	0	0	0	0	0	PLOR
28	1990	1	1	0	1	1	0	0	0	PLOR
29	1990	1	0	0	1	0	0	0	0	PLOR
30	1990	1	1	0	1	0	0	0	0	PLOR
31	1990	1	0	0	1	0	0	0	0	PLOR
33	1990	1	1	0	1	0	1	0	0	PLOR
34	1990	0	1	0	1	1	0	0	0	PLOR
35	1990	0	1	0	1	0	0	0	0	PLOR
36	1990	0	0	0	0	0	0	0	0	PLOR
37	1990	0	1	0	0	0	0	0	0	PLOR
38	1990	0	1	0	1	0	0	0	0	PLOR
39	1990	0	1	0	1	1	1	0	0	PLOR
40	1990	0	0	0	1	0	0	0	0	PLOR
41	1990	0	1	1	0	0	0	0	0	PLOR
42	1990	0	0	0	0	0	0	0	0	PLOR
43	1990	1	1	1	0	0	0	0	0	PLOR
44	1990	0	1	0	1	0	0	0	0	PLOR
45	1990	0	1	0	0	0	0	1	0	PLOR
46	1990	1	0	1	1	0	0	0	0	PLOR
47	1990	1	1	1	0	0	0	0	0	PLOR
48	1990	0	0	0	0	0	0	0	0	PLOR
49	1990	1	0	0	0	0	0	0	0	PLOR
50	1990	0	0	0	0	0	1	0	0	PLOR
51	1990	0	1	0	0	0	0	0	1	PLOR
52	1990	1	0	1	0	0	0	0	1	PLOR
53	1990	0	0	0	0	0	0	0	0	PLOR
54	1990	1	1	0	0	0	0	0	0	PLOR
56	1990	0	0	0	0	0	0	0	0	PLOR
57	1990	0	1	0	1	0	1	0	0	PLOR
58	1990	0	1	0	1	0	0	0	0	PLOR
59	1990	1	1	0	1	0	1	0	0	PLOR
60	1990	1	1	0	1	0	0	0	0	PLOR
61	1990	1	0	0	1	0	0	0	0	PLOR
62	1990	1	1	0	0	0	0	0	0	ANGO
63	1990	1	0	0	1	0	0	0	0	ANGO
64	1990	1	1	0	0	0	1	0	0	ANGO
65	1990	1	1	0	1	0	0	0	0	ANGO
66	1990	1	0	0	1	1	0	0	0	ANGO
67	1990	1	1	1	1	0	0	0	0	ANGO
68	1990	0	0	0	1	0	0	0	0	ANGO
69	1990	1	1	0	1	0	1	0	0	ANGO
71	1990	1	1	1	0	0	0	0	0	ANGO
73	1990	0	1	0	0	0	0	0	0	ANGO
74	1990	0	1	1	1	0	0	0	0	ANGO
75	1990	0	1	0	0	0	0	0	0	ANGO
76	1990	0	1	0	1	0	0	0	0	PLTI
77	1990	1	1	0	1	0	0	1	0	PLTI
78	1990	0	1	0	1	1	0	0	0	PLTI
81	1990	0	1	0	1	1	0	0	0	PLTI
82	1990	1	1	0	1	0	1	0	0	PLTI
83	1990	1	1	1	1	1	0	0	0	PLTI
84	1990	0	1	0	0	1	1	0	0	PLTI
85	1990	1	0	0	1	1	0	0	0	PLTI
86	1990	0	1	0	1	1	0	0	0	PLTI
87	1990	0	0	0	1	0	0	0	0	PLTI
88	1990	0	0	0	0	1	0	0	0	PLTI
89	1990	0	1	0	1	0	0	0	0	PLTI
90	1990	0	1	0	1	0	0	0	0	PLTI
91	1990	0	0	0	1	0	0	0	0	PLTI
92	1990	1	0	0	1	0	0	0	0	PLTI
93	1990	0	0	0	1	1	0	1	0	PLNU
94	1990	1	1	0	1	0	1	0	0	PLNU
95	1990	1	1	0	1	0	0	0	0	PLNU
97	1990	1	1	0	0	0	0	0	0	ZAPO
98	1990	1	1	0	1	0	0	0	0	ZAPO
99	1990	1	1	0	1	1	0	0	0	ZAPO
100	1990	0	1	0	1	0	0	0	0	ZAPO
101	1990	1	1	0	1	0	0	0	0	PARE
102	1990	1	1	0	1	0	0	0	0	PARE
103	1990	0	0	0	1	0	1	0	0	PARE
105	1990	1	1	0	1	0	0	0	0	PARE
106	1990	1	1	0	1	0	1	0	0	PARE
107	1990	0	0	0	1	0	0	0	0	GUAY
108	1990	1	0	0	1	0	0	0	0	GUAY
109	1990	1	1	1	1	0	1	0	0	GUAY
110	1990	0	0	0	1	0	0	1	0	GUAY
111	1990	1	1	0	1	0	0	0	0	GUAY
112	1990	1	1	0	1	0	0	0	0	GUAY
113	1990	1	1	1	0	1	0	0	0	GUAY
114	1990	1	1	0	1	1	0	0	0	GUAY
115	1990	1	0	0	1	0	0	0	0	GUAY
116	1990	1	0	0	1	0	0	0	0	GUAY
117	1990	1	1	0	1	1	0	0	0	GUAY
118	1990	0	1	0	1	1	0	0	0	GUAY
120	1990	1	0	0	1	0	0	0	0	GUAY
121	1990	1	0	0	1	0	0	0	0	GUAY
122	1990	1	1	0	1	0	0	0	0	GUAY
123	1990	1	1	0	1	1	0	0	0	GUAY
124	1990	1	0	0	1	1	0	0	0	GUAY
128	1990	1	1	0	1	0	0	0	0	GUAY
129	1990	0	1	0	1	0	0	0	0	GUAY
130	1990	0	0	0	0	0	0	0	0	PENI
131	1990	1	0	0	0	1	0	0	0	PICA
